# Supplementary material for: Age-associated miRNA Alterations in Skeletal Muscle from Rhesus Monkeys reversed by caloric restriction
Source: Aging (Albany NY). 2013 Sep 9;5(9):692–703. doi: 10.18632/aging.100598 (PMC3808701; doi:10.18632/aging.100598)
Supplement: Supplementary file 1 [file aging-05-692-s001.xlsx]

## Sheet: Samples
Young group
1Y
3Y
33Y
64Y
65Y	Removed from the differential expression analysis after data QC
Old group
652O
192O
509O
12352O
22383O
17517O

## Sheet: Differentia Expression
miRNA ID	baseMean	baseMean (Young group)	baseMean (Old group)	foldChange	log2FoldChange	pval	padj (FDR)
mml-miR-18a:mml-mir-18a	37.772	5.85688	59.0488	10.082	3.3337	9.27235e-05	0.0418183
mml-miR-144:mml-mir-144	906.665	27.8491	1492.54	53.5939	5.744	0.000407799	0.058328
mml-miR-223:mml-mir-223	49.5992	16.6791	71.5459	4.28954	2.10082	0.00044245	0.058328
mml-miR-451:mml-mir-451	19261.7	375.837	31852.3	84.7504	6.40515	0.000595612	0.058328
mml-miR-194:mml-mir-194-1	36.4671	12.5042	52.4424	4.19398	2.06832	0.000646652	0.058328
mml-miR-1271:mml-mir-1271	559.81	243.551	770.649	3.16423	1.66185	0.000783648	0.0589042
mml-miR-1323:mml-mir-1323	30.3209	53.1887	15.0758	0.283439	-1.81889	0.00126792	0.0816903
mml-miR-194:mml-mir-194-2	32.8983	11.4771	47.1791	4.11072	2.03939	0.00184583	0.0888734
mml-miR-142-3p:mml-mir-142	86.1159	19.7148	130.383	6.61345	2.7254	0.00187658	0.0888734
mml-miR-141:mml-mir-141	116.402	10.2651	187.16	18.2326	4.18845	0.00197059	0.0888734
mml-miR-489:mml-mir-489	63.5662	105.133	35.8553	0.341048	-1.55195	0.0028492	0.116817
mml-miR-20a:mml-mir-20a	391.723	165.572	542.49	3.27646	1.71214	0.00346923	0.130385
mml-miR-17-5p:mml-mir-17	306.57	122.609	429.211	3.50064	1.80762	0.00419482	0.145528
mml-miR-106b:mml-mir-106b	281.992	66.9028	425.385	6.35826	2.66863	0.00459665	0.148078
mml-miR-221:mml-mir-221	369.633	177.279	497.869	2.80839	1.48974	0.00530493	0.15017
mml-miR-339-5p:mml-mir-339	63.611	31.1097	85.2785	2.74122	1.45482	0.00532755	0.15017
mml-miR-142-5p:mml-mir-142	2805.37	373.5	4426.61	11.8517	3.56702	0.00590973	0.156782
mml-miR-15a:mml-mir-15a	969.046	517.079	1270.36	2.4568	1.29678	0.00671754	0.168312
mml-miR-215:mml-mir-215	39.289	13.1646	56.7052	4.30739	2.10681	0.0113943	0.270464
mml-miR-192:mml-mir-192	722.156	405.885	933.004	2.29869	1.20081	0.0154087	0.347467
mml-miR-93:mml-mir-93	1487.26	541.029	2118.08	3.91492	1.96898	0.0165014	0.354388
mml-miR-34a:mml-mir-34a	45.2668	22.9349	60.1548	2.62285	1.39114	0.0198927	0.393579
mml-miR-32:mml-mir-32	71.3884	29.2407	99.4869	3.40234	1.76653	0.0200717	0.393579
mml-miR-200c:mml-mir-200c	6.75164	0.365632	11.009	30.1094	4.91214	0.0215039	0.404094
mml-miR-942:mml-mir-942	15.9351	1.39276	25.63	18.4024	4.20182	0.0248945	0.449096
mml-miR-181a-3p:mml-mir-181a-1	189.25	281.821	127.535	0.452538	-1.14389	0.0295079	0.496601
mml-miR-409-5p:mml-mir-409	35.3755	12.2178	50.814	4.15902	2.05624	0.02973	0.496601
mml-miR-653:mml-mir-653	66.9217	101.204	44.0667	0.435424	-1.19951	0.0327615	0.506679
mml-miR-17-3p:mml-mir-17	26.9992	12.3134	36.7898	2.98778	1.57907	0.0362181	0.506679
mml-miR-181a-5p:mml-mir-181a-1	20471.2	29376.2	14534.6	0.494776	-1.01515	0.0372002	0.506679
mml-miR-181a-5p:mml-mir-181a-2	20471.2	29376.2	14534.6	0.494776	-1.01515	0.0372002	0.506679
mml-miR-181a:mml-mir-181a-1	20471.2	29376.2	14534.6	0.494776	-1.01515	0.0372002	0.506679
mml-miR-181a:mml-mir-181a-2	20471.2	29376.2	14534.6	0.494776	-1.01515	0.0372002	0.506679
mml-miR-495:mml-mir-495	11.704	4.74038	16.3464	3.44834	1.7859	0.0422862	0.506679
mml-miR-19b:mml-mir-19b-1	328.985	208.493	409.313	1.9632	0.973204	0.0437941	0.506679
mml-miR-19b:mml-mir-19b-2	328.921	208.493	409.205	1.96268	0.972825	0.0439068	0.506679
mml-miR-129-5p:mml-mir-129-1	10.4185	0.365632	17.1204	46.8242	5.54918	0.0449383	0.506679
mml-miR-129-5p:mml-mir-129-2	10.4185	0.365632	17.1204	46.8242	5.54918	0.0449383	0.506679
mml-miR-129:mml-mir-129-1	10.4185	0.365632	17.1204	46.8242	5.54918	0.0449383	0.506679
mml-miR-129:mml-mir-129-2	10.4185	0.365632	17.1204	46.8242	5.54918	0.0449383	0.506679
mml-miR-15b:mml-mir-15b	266.645	84.2778	388.222	4.60646	2.20366	0.0461823	0.508005
mml-miR-19a:mml-mir-19a	62.9017	25.7721	87.6548	3.40115	1.76602	0.048424	0.519981
mml-miR-16:mml-mir-16-2	11787.6	5925.67	15695.5	2.64873	1.4053	0.0510162	0.524209
mml-miR-16:mml-mir-16-1	11776.4	5921.68	15679.6	2.64782	1.40481	0.0511423	0.524209
mml-miR-181b:mml-mir-181b-1	696.064	976.668	508.995	0.521155	-0.940217	0.0557818	0.554636
mml-miR-181b:mml-mir-181b-2	709.176	992.216	520.482	0.524565	-0.930806	0.0581037	0.554636
mml-miR-29b:mml-mir-29b-2	223.811	145.646	275.921	1.89446	0.921787	0.0581401	0.554636
mml-miR-29b:mml-mir-29b-1	223.978	145.926	276.013	1.89146	0.919501	0.05903	0.554636
mml-miR-150:mml-mir-150	328.361	427.392	262.34	0.613815	-0.704123	0.0631189	0.580952
mml-miR-338-3p:mml-mir-338	117.377	82.528	140.61	1.70378	0.768743	0.0694601	0.62653
mml-miR-628-3p:mml-mir-628	86.7289	122.28	63.0283	0.515444	-0.956112	0.0725494	0.641565
mml-miR-452:mml-mir-452	32.684	19.3521	41.572	2.1482	1.10313	0.0799561	0.693466
mml-miR-425:mml-mir-425	234.283	128.038	305.114	2.383	1.25278	0.0878679	0.747706
mml-miR-151-3p:mml-mir-151	3905.57	5250.37	3009.04	0.57311	-0.803115	0.0953208	0.796105
mml-miR-185:mml-mir-185	34.6006	21.6535	43.232	1.99653	0.997495	0.0996719	0.81731
mml-miR-128b:mml-mir-128b	1271.19	1703.91	982.709	0.576738	-0.794011	0.104021	0.83774
mml-miR-125a-5p:mml-mir-125a	4674.82	6153.67	3688.91	0.599465	-0.738252	0.111128	0.879274
mml-miR-107:mml-mir-107	534.454	387.078	632.704	1.63456	0.708905	0.114558	0.890786
mml-miR-381:mml-mir-381	1185.13	835.342	1418.33	1.6979	0.763755	0.119503	0.913486
mml-miR-551b:mml-mir-551b	1.85313	0	3.08855	Inf	Inf	0.123358	0.925831
mml-let-7e:mml-let-7e	387.215	485.869	321.446	0.66159	-0.59599	0.125767	0.925831
mml-miR-409-3p:mml-mir-409	286.549	368.622	231.833	0.628918	-0.669056	0.133361	0.925831
mml-miR-939:mml-mir-939	1.45024	3.34214	0.188969	0.0565412	-4.14455	0.134741	0.925831
mml-miR-134:mml-mir-134	49.9417	61.6688	42.1236	0.683062	-0.549912	0.135389	0.925831
mml-miR-100:mml-mir-100	7404.33	3948.73	9708.05	2.45852	1.29779	0.136931	0.925831
mml-miR-450b-5p:mml-mir-450b	20.3825	14.204	24.5014	1.72497	0.786569	0.140923	0.925831
mml-miR-27a:mml-mir-27a	57832.1	75548.2	46021.5	0.609167	-0.715091	0.144853	0.925831
mml-miR-27b:mml-mir-27b	112115	146343	89296.8	0.610188	-0.712674	0.145405	0.925831
mml-miR-133a:mml-mir-133a	111.298	161.995	77.4997	0.478406	-1.06369	0.148611	0.925831
mml-miR-145:mml-mir-145	502.898	360.478	597.846	1.65848	0.729862	0.150159	0.925831
mml-miR-584:mml-mir-584	63.4707	16.1014	95.0502	5.90322	2.5615	0.151087	0.925831
mml-miR-6134:mml-mir-6134	8.38661	13.2232	5.1622	0.390389	-1.35702	0.151144	0.925831
mml-miR-25:mml-mir-25	2976.24	1942.15	3665.64	1.88741	0.916409	0.151387	0.925831
mml-miR-92a:mml-mir-92a-2	13314.3	8564.1	16481.1	1.92444	0.944438	0.153456	0.925831
mml-miR-484:mml-mir-484	289.743	180.683	362.45	2.006	1.00432	0.158583	0.925831
mml-miR-92a:mml-mir-92a-1	13834.2	8974.98	17073.7	1.90237	0.927794	0.160334	0.925831
mml-miR-505:mml-mir-505	31.8256	20.378	39.4574	1.93627	0.953283	0.161263	0.925831
mml-miR-206:mml-mir-206	143.542	185.424	115.621	0.623549	-0.681425	0.16133	0.925831
mml-miR-889:mml-mir-889	112.087	142.026	92.1273	0.648665	-0.624455	0.16566	0.925831
mml-miR-184:mml-mir-184	1.50328	0	2.50547	Inf	Inf	0.180221	0.925831
mml-miR-9:mml-mir-9-1	39.5701	19.741	52.7895	2.6741	1.41905	0.180603	0.925831
mml-miR-9:mml-mir-9-2	39.5701	19.741	52.7895	2.6741	1.41905	0.180603	0.925831
mml-miR-9:mml-mir-9-3	39.5701	19.741	52.7895	2.6741	1.41905	0.180603	0.925831
mml-miR-3200:mml-mir-3200	3.62075	1.37041	5.12097	3.73681	1.90181	0.180637	0.925831
mml-miR-1240:mml-mir-1240	4.63103	7.14908	2.95233	0.412967	-1.2759	0.181523	0.925831
mml-miR-210:mml-mir-210	88.7598	64.5258	104.916	1.62595	0.701284	0.191433	0.925831
mml-miR-374a:mml-mir-374a	118.465	94.5024	134.441	1.42262	0.508548	0.19508	0.925831
mml-miR-10a:mml-mir-10a	93161.9	109320	82390.1	0.753662	-0.40801	0.195639	0.925831
mml-miR-155:mml-mir-155	65.9767	47.1369	78.5366	1.66614	0.73651	0.196301	0.925831
mml-miR-205:mml-mir-205	1.24584	2.47348	0.427412	0.172798	-2.53285	0.196551	0.925831
mml-miR-331-3p:mml-mir-331	229.077	168.218	269.65	1.60298	0.680754	0.197952	0.925831
mml-miR-485-5p:mml-mir-485	5.91684	8.56761	4.14966	0.484343	-1.0459	0.198651	0.925831
mml-miR-140-3p:mml-mir-140	1181.15	922.225	1353.77	1.46794	0.553789	0.204877	0.925831
mml-miR-181c:mml-mir-181c	1040.34	1284.4	877.629	0.6833	-0.549409	0.207691	0.925831
mml-miR-193a-3p:mml-mir-193a	11.6756	6.05062	15.4255	2.54941	1.35016	0.207862	0.925831
mml-miR-302b:mml-mir-302b	1.53008	0	2.55013	Inf	Inf	0.209744	0.925831
mml-miR-576-5p:mml-mir-576	2.66889	0.64532	4.01793	6.22627	2.63837	0.210526	0.925831
mml-miR-125b:mml-mir-125b-2	5387.51	6814.71	4436.05	0.650952	-0.619378	0.211545	0.925831
mml-miR-125b:mml-mir-125b-1	5356.24	6771.25	4412.89	0.65171	-0.617697	0.213547	0.925831
mml-miR-486-5p:mml-mir-486	602397	486161	679887	1.39848	0.483859	0.213779	0.925831
mml-miR-551a:mml-mir-551a	0.722763	1.57033	0.15772	0.100438	-3.31563	0.215254	0.925831
mml-miR-375:mml-mir-375	11.6794	3.38888	17.2063	5.07729	2.34406	0.215489	0.925831
mml-miR-21:mml-mir-21	16874.1	12601.1	19722.7	1.56516	0.646306	0.22085	0.925831
mml-miR-95:mml-mir-95	312.645	253.13	352.323	1.39187	0.477022	0.223037	0.925831
mml-miR-138:mml-mir-138	1.30084	0	2.16806	Inf	Inf	0.225516	0.925831
mml-miR-18b:mml-mir-18b	1.296	0	2.16	Inf	Inf	0.226783	0.925831
mml-miR-222:mml-mir-222	109.113	85.1054	125.118	1.47016	0.555972	0.227192	0.925831
mml-miR-208b:mml-mir-208b	792.687	1173.7	538.677	0.458955	-1.12358	0.230713	0.925831
mml-miR-4803:mml-mir-4803	1.35972	0	2.26621	Inf	Inf	0.23314	0.925831
mml-miR-1249:mml-mir-1249	11.0823	6.88949	13.8776	2.01431	1.01029	0.235227	0.925831
mml-miR-92b:mml-mir-92b	219.497	160.692	258.7	1.60991	0.686983	0.237193	0.925831
mml-miR-450a:mml-mir-450a-1	5.73546	2.53659	7.86804	3.10182	1.63311	0.241213	0.925831
mml-miR-450a:mml-mir-450a-2	5.73546	2.53659	7.86804	3.10182	1.63311	0.241213	0.925831
mml-miR-592:mml-mir-592	2.62524	1.04947	3.67576	3.5025	1.80838	0.245382	0.925831
mml-miR-181d:mml-mir-181d	97.9423	117.422	84.956	0.723512	-0.466912	0.245556	0.925831
mml-miR-506:mml-mir-506	2.03495	0	3.39158	Inf	Inf	0.250053	0.925831
mml-miR-103:mml-mir-103-1	1314.08	1040.19	1496.67	1.43884	0.52491	0.250499	0.925831
mml-miR-103:mml-mir-103-2	1319.94	1047.63	1501.48	1.43322	0.519263	0.253865	0.925831
mml-miR-148b:mml-mir-148b	1527.3	1084.94	1822.21	1.67956	0.748079	0.255776	0.925831
mml-miR-30a-3p:mml-mir-30a	3301.01	4110.97	2761.04	0.671629	-0.574264	0.258023	0.925831
mml-miR-30e:mml-mir-30e	19379.6	23886.4	16375.1	0.68554	-0.544688	0.259892	0.925831
mml-let-7d:mml-let-7d	1479.96	1750.33	1299.71	0.742551	-0.429437	0.261668	0.925831
mml-miR-1:mml-mir-1-1	286.936	363.582	235.839	0.648654	-0.62448	0.263029	0.925831
mml-miR-147b:mml-mir-147b	1.21003	0	2.01672	Inf	Inf	0.266098	0.925831
mml-miR-378d:mml-mir-378d	19460.5	24264.4	16257.8	0.670028	-0.577708	0.272626	0.925831
mml-miR-29c:mml-mir-29c	1790.48	1463.94	2008.18	1.37176	0.456032	0.273909	0.925831
mml-miR-128a:mml-mir-128a	709.411	867.901	603.752	0.695646	-0.523575	0.275	0.925831
mml-miR-23a:mml-mir-23a	2218.82	2644.7	1934.9	0.731612	-0.45085	0.277035	0.925831
mml-miR-486-3p:mml-mir-486	1268.87	1573.89	1065.53	0.677002	-0.562769	0.279783	0.925831
mml-miR-190b:mml-mir-190b	36.894	49.7821	28.302	0.568517	-0.814726	0.28159	0.925831
mml-let-7c:mml-let-7c	3407.15	3932.66	3056.81	0.777287	-0.363481	0.285268	0.925831
mml-miR-1255b:mml-mir-1255b	5.4509	2.53659	7.39378	2.91485	1.54342	0.288167	0.925831
mml-miR-323-3p:mml-mir-323	1.48588	2.83294	0.587837	0.207501	-2.26881	0.289746	0.925831
mml-miR-199a-5p:mml-mir-199a-2	807.034	951.349	710.825	0.747176	-0.420481	0.291215	0.925831
mml-miR-199a:mml-mir-199a-2	807.034	951.349	710.825	0.747176	-0.420481	0.291215	0.925831
mml-miR-199a-5p:mml-mir-199a-1	807.09	951.349	710.917	0.747272	-0.420294	0.29143	0.925831
mml-miR-199a:mml-mir-199a-1	807.09	951.349	710.917	0.747272	-0.420294	0.29143	0.925831
mml-miR-3122:mml-mir-3122	1.12749	0	1.87916	Inf	Inf	0.292314	0.925831
mml-let-7f:mml-let-7f-1	33835.9	40221.1	29579.1	0.735413	-0.443374	0.29404	0.925831
mml-miR-130b:mml-mir-130b	7.49237	4.29772	9.62214	2.2389	1.16279	0.294098	0.925831
mml-miR-423-5p:mml-mir-423	284.468	357.464	235.804	0.659657	-0.600213	0.294218	0.925831
mml-let-7f:mml-let-7f-2	33972.5	40381.6	29699.7	0.735477	-0.443248	0.294313	0.925831
mml-miR-654-5p:mml-mir-654	6.24483	8.37661	4.82365	0.575848	-0.796241	0.294593	0.925831
mml-miR-532-5p:mml-mir-532	605.444	729.347	522.843	0.716865	-0.480227	0.296584	0.925831
mml-miR-499-3p:mml-mir-499	4.71181	6.78365	3.33058	0.490972	-1.02629	0.297662	0.925831
mml-miR-151-5p:mml-mir-151	5062.2	6054.13	4400.91	0.726928	-0.460117	0.315508	0.973283
mml-miR-34c-5p:mml-mir-34c	24.8879	10.6743	34.3636	3.21929	1.68674	0.321072	0.973283
mml-miR-26b:mml-mir-26b	9606.95	11755	8174.88	0.695436	-0.524011	0.322843	0.973283
mml-miR-193b:mml-mir-193b	2528.15	2065.29	2836.72	1.37352	0.457881	0.329451	0.973283
mml-miR-135a:mml-mir-135a-1	1.13595	0	1.89324	Inf	Inf	0.330257	0.973283
mml-miR-135a:mml-mir-135a-2	1.13595	0	1.89324	Inf	Inf	0.330257	0.973283
mml-miR-7:mml-mir-7-1	85.5111	74.4687	92.8726	1.24714	0.31862	0.33572	0.973283
mml-miR-7:mml-mir-7-2	85.5111	74.4687	92.8726	1.24714	0.31862	0.33572	0.973283
mml-miR-7:mml-mir-7-3	85.5111	74.4687	92.8726	1.24714	0.31862	0.33572	0.973283
mml-miR-508:mml-mir-508	50.089	8.54751	77.7834	9.10012	3.18588	0.336142	0.973283
mml-miR-301b:mml-mir-301b	2.25878	1.36767	2.85286	2.08593	1.06069	0.336657	0.973283
mml-miR-510:mml-mir-510	2.41574	0	4.02623	Inf	Inf	0.340084	0.974629
mml-miR-216b:mml-mir-216b	1.60167	2.6827	0.880986	0.328395	-1.6065	0.341444	0.974629
mml-miR-143:mml-mir-143	162429	187395	145785	0.777954	-0.362243	0.355263	0.997862
mml-miR-374b:mml-mir-374b	63.8836	52.0506	71.7723	1.37889	0.463512	0.355686	0.997862
mml-miR-98:mml-mir-98	2135.57	2412.49	1950.96	0.808691	-0.306339	0.357261	0.997862
mml-miR-299-5p:mml-mir-299	42.5295	33.0503	48.8489	1.47802	0.563664	0.360432	0.997862
mml-miR-502-3p:mml-mir-502	204.761	242.846	179.371	0.738619	-0.437097	0.360646	0.997862
mml-miR-513b:mml-mir-513b-1	0.97571	0	1.62618	Inf	Inf	0.370071	1
mml-miR-513b:mml-mir-513b-2	0.97571	0	1.62618	Inf	Inf	0.370071	1
mml-miR-99b:mml-mir-99b	7764.53	5539.47	9247.9	1.66945	0.739377	0.380712	1
mml-miR-30a-5p:mml-mir-30a	34330.6	40346.1	30320.2	0.751501	-0.412153	0.382974	1
mml-miR-338-5p:mml-mir-338	7.39501	4.70187	9.19044	1.95464	0.966901	0.388187	1
mml-miR-378a:mml-mir-378a	197524	233358	173634	0.744069	-0.426491	0.390493	1
mml-miR-671-3p:mml-mir-671	58.3525	75.7025	46.7859	0.618024	-0.694266	0.395351	1
mml-miR-652:mml-mir-652	66.0796	54.5255	73.7823	1.35317	0.436343	0.397371	1
mml-miR-1260b:mml-mir-1260b	295.375	339.147	266.193	0.784889	-0.34944	0.405694	1
mml-miR-449a:mml-mir-449a	0.958326	0	1.59721	Inf	Inf	0.406427	1
mml-miR-136:mml-mir-136	71.4819	80.4383	65.511	0.814426	-0.296145	0.406724	1
mml-miR-301a:mml-mir-301a	98.1633	84.6046	107.202	1.2671	0.341528	0.419737	1
mml-miR-424:mml-mir-424	39.1568	31.014	44.5854	1.43759	0.523652	0.422963	1
mml-miR-149:mml-mir-149	68.8901	81.7995	60.2838	0.736971	-0.440321	0.425904	1
mml-miR-496:mml-mir-496	2.09461	0.731265	3.0035	4.10727	2.03818	0.429076	1
mml-miR-212:mml-mir-212	24.3468	29.4849	20.9214	0.709562	-0.494999	0.429112	1
mml-miR-203:mml-mir-203	4.93481	8.04391	2.86208	0.355807	-1.49083	0.433279	1
mml-miR-10b:mml-mir-10b	1.05553e+06	1.15487e+06	989300	0.856633	-0.22325	0.438043	1
mml-miR-501:mml-mir-501	3.5956	5.27193	2.47804	0.470045	-1.08913	0.444987	1
mml-miR-154:mml-mir-154	7.88732	4.79075	9.9517	2.07727	1.05469	0.445227	1
mml-miR-23b:mml-mir-23b	3630.29	4224.73	3233.99	0.76549	-0.385544	0.448171	1
mml-miR-875-3p:mml-mir-875	0.385409	0.963522	0	0	#NAME?	0.449002	1
mml-miR-30c:mml-mir-30c-1	7318.07	8554.57	6493.73	0.759095	-0.397647	0.452013	1
mml-miR-30c:mml-mir-30c-2	7319.94	8556.66	6495.47	0.759113	-0.397614	0.452039	1
mml-let-7b:mml-let-7b	6929.78	7566.2	6505.5	0.85981	-0.21791	0.455057	1
mml-miR-22:mml-mir-22	301141	353735	266077	0.752193	-0.410825	0.455537	1
mml-miR-1:mml-mir-1-2	401.621	475.392	352.44	0.741366	-0.431742	0.457068	1
mml-miR-675:mml-mir-675	0.86314	0	1.43857	Inf	Inf	0.461488	1
mml-miR-676:mml-mir-676	60.1226	69.9476	53.5727	0.765897	-0.384777	0.469994	1
mml-miR-122a:mml-mir-122a	2.53755	1.37041	3.31564	2.41945	1.27468	0.472386	1
mml-miR-214:mml-mir-214	178.628	193.327	168.829	0.873281	-0.195483	0.477145	1
mml-miR-380:mml-mir-380	5.53457	6.7712	4.71016	0.695616	-0.523636	0.478857	1
mml-miR-885-5p:mml-mir-885	667.382	581.738	724.478	1.24537	0.316572	0.481995	1
mml-miR-499-5p:mml-mir-499	329.722	423.417	267.259	0.631196	-0.663839	0.48544	1
mml-miR-544:mml-mir-544	0.24919	0.622975	0	0	#NAME?	0.488498	1
mml-miR-455-5p:mml-mir-455	13.7765	10.902	15.6927	1.43943	0.525498	0.490445	1
mml-miR-324-5p:mml-mir-324	11.0546	8.0686	13.0453	1.6168	0.693143	0.498586	1
mml-miR-342-3p:mml-mir-342	324.456	348.731	308.272	0.883983	-0.17791	0.498818	1
mml-miR-127:mml-mir-127	7400.96	8164.01	6892.27	0.844226	-0.244299	0.501037	1
mml-let-7a:mml-let-7a-2	23114.3	24860.2	21950.3	0.882948	-0.1796	0.511104	1
mml-let-7a:mml-let-7a-3	23040.8	24773.7	21885.5	0.883416	-0.178835	0.511899	1
mml-miR-187:mml-mir-187	9.32379	7.24238	10.7114	1.47899	0.564611	0.512226	1
mml-let-7a:mml-let-7a-1	23018.4	24748.8	21864.8	0.883468	-0.17875	0.512623	1
mml-miR-660:mml-mir-660	328.323	359.517	307.526	0.855388	-0.22535	0.513314	1
mml-miR-376a:mml-mir-376a-1	9.89165	11.3208	8.93889	0.7896	-0.340806	0.516335	1
mml-miR-376a:mml-mir-376a-2	9.89165	11.3208	8.93889	0.7896	-0.340806	0.516335	1
mml-miR-369-5p:mml-mir-369	14.4783	17.3205	12.5835	0.726509	-0.460948	0.516667	1
mml-miR-758:mml-mir-758	4.29478	4.94304	3.86261	0.781423	-0.355824	0.517009	1
mml-miR-106a:mml-mir-106a	2.56103	1.18235	3.48015	2.94341	1.55749	0.519897	1
mml-miR-455-3p:mml-mir-455	6.78967	7.65152	6.2151	0.81227	-0.299969	0.520914	1
mml-miR-874:mml-mir-874	72.9674	63.1009	79.545	1.2606	0.334111	0.52193	1
mml-miR-590-3p:mml-mir-590	78.0603	68.8799	84.1806	1.22214	0.289406	0.532778	1
mml-miR-541:mml-mir-541	2.60972	3.672	1.90154	0.517848	-0.949401	0.534406	1
mml-miR-199a-3p:mml-mir-199a-1	4259.53	4690.99	3971.89	0.846706	-0.240066	0.534721	1
mml-miR-378j:mml-mir-378j	8.7609	10.4082	7.66269	0.736216	-0.441799	0.537227	1
mml-miR-199a-3p:mml-mir-199a-2	4215.31	4638.54	3933.15	0.847929	-0.237985	0.537608	1
mml-miR-511:mml-mir-511	6.52688	5.12562	7.46106	1.45564	0.541655	0.540134	1
mml-miR-29a:mml-mir-29a	2858.33	2589.77	3037.36	1.17283	0.229994	0.541733	1
mml-miR-454:mml-mir-454	24.988	20.6996	27.8469	1.34529	0.427912	0.544192	1
mml-miR-34c-3p:mml-mir-34c	0.69722	0	1.16203	Inf	Inf	0.544619	1
mml-miR-542-3p:mml-mir-542	7.2686	5.51584	8.4371	1.52961	0.613166	0.547222	1
mml-miR-302a:mml-mir-302a	0.787149	0	1.31192	Inf	Inf	0.551297	1
mml-miR-218:mml-mir-218-1	18.7335	14.7576	21.3841	1.44902	0.53508	0.552942	1
mml-miR-218:mml-mir-218-2	18.7335	14.7576	21.3841	1.44902	0.53508	0.552942	1
mml-miR-188:mml-mir-188	13.1207	10.4696	14.8881	1.42203	0.507953	0.554107	1
mml-miR-362-3p:mml-mir-362	6.93364	7.71189	6.41481	0.831808	-0.265678	0.558742	1
mml-miR-20b:mml-mir-20b	1.16127	0.365632	1.6917	4.62678	2.21001	0.559152	1
mml-miR-193a-5p:mml-mir-193a	15.2828	16.8265	14.2537	0.847095	-0.239405	0.559441	1
mml-miR-6128:mml-mir-6128	0.686349	0	1.14392	Inf	Inf	0.561238	1
mml-miR-361-5p:mml-mir-361	523.437	575.441	488.767	0.849379	-0.23552	0.565066	1
mml-miR-376b:mml-mir-376b	2.58835	1.32915	3.42781	2.57894	1.36678	0.566095	1
mml-miR-369-3p:mml-mir-369	15.7994	13.5991	17.2662	1.26966	0.344447	0.567501	1
mml-miR-654-3p:mml-mir-654	421.755	452.305	401.388	0.887428	-0.172299	0.577157	1
mml-miR-885-3p:mml-mir-885	6.62664	8.79165	5.18329	0.58957	-0.762264	0.577239	1
mml-miR-605:mml-mir-605	7.18272	4.72989	8.81794	1.8643	0.898635	0.577745	1
mml-miR-216a:mml-mir-216a	1.34979	1.99613	0.9189	0.460342	-1.11922	0.578127	1
mml-miR-129-3p:mml-mir-129-1	1.16484	0.365632	1.69764	4.64302	2.21506	0.593169	1
mml-miR-1235:mml-mir-1235	12.6564	16.098	10.3619	0.643678	-0.63559	0.593622	1
mml-miR-382:mml-mir-382	9.40331	10.5387	8.64641	0.820448	-0.285516	0.594021	1
mml-miR-196a:mml-mir-196a-2	1402.35	1545.09	1307.19	0.84603	-0.241219	0.599463	1
mml-miR-513a:mml-mir-513a-1	1.10357	0.365632	1.59553	4.36374	2.12557	0.607051	1
mml-miR-513a:mml-mir-513a-2	1.10357	0.365632	1.59553	4.36374	2.12557	0.607051	1
mml-miR-513a:mml-mir-513a-3	1.10357	0.365632	1.59553	4.36374	2.12557	0.607051	1
mml-miR-211:mml-mir-211	10.4756	5.36953	13.8797	2.5849	1.37011	0.608779	1
mml-miR-500:mml-mir-500	15.1776	17.6998	13.4961	0.762502	-0.391187	0.609682	1
mml-miR-34b:mml-mir-34b	1.14747	0.365632	1.66869	4.56385	2.19025	0.615542	1
mml-miR-370:mml-mir-370	7.40864	8.62553	6.59737	0.764866	-0.386721	0.617792	1
mml-miR-148a:mml-mir-148a	17682.8	19555.2	16434.5	0.840416	-0.250825	0.618777	1
mml-miR-532-3p:mml-mir-532	22.3296	24.75	20.716	0.837009	-0.256685	0.623805	1
mml-miR-365:mml-mir-365-1	919.017	1028.15	846.262	0.823091	-0.280876	0.628352	1
mml-miR-365:mml-mir-365-2	919.017	1028.15	846.262	0.823091	-0.280876	0.628352	1
mml-miR-4796:mml-mir-4796	17.3769	17.4185	17.3491	0.99602	-0.00575405	0.629152	1
mml-miR-335:mml-mir-335	118.894	130.033	111.468	0.857223	-0.222258	0.62963	1
mml-miR-1304:mml-mir-1304	8.41436	6.93368	9.40148	1.35591	0.439267	0.629816	1
mml-miR-887:mml-mir-887	16.0345	17.9657	14.747	0.820844	-0.28482	0.629967	1
mml-miR-433:mml-mir-433	3.44695	4.46069	2.77113	0.621233	-0.686794	0.630397	1
mml-miR-361-3p:mml-mir-361	181.774	201.824	168.408	0.834429	-0.261139	0.630872	1
mml-miR-28:mml-mir-28	882.393	963.232	828.5	0.860125	-0.217381	0.633391	1
mml-miR-514a:mml-mir-514a	2.70705	0.902663	3.90997	4.3316	2.1149	0.634001	1
mml-miR-320a:mml-mir-320a	576.648	639.296	534.882	0.836674	-0.257263	0.637659	1
mml-miR-302d:mml-mir-302d	1.08521	0.279687	1.62223	5.80014	2.53609	0.642362	1
mml-miR-191:mml-mir-191	51252	55825.5	48203	0.863459	-0.211801	0.642985	1
mml-miR-497:mml-mir-497	158.372	170.992	149.959	0.876993	-0.189363	0.644397	1
mml-miR-24-5p:mml-mir-24-1	36.3511	39.1924	34.4569	0.879172	-0.185782	0.645253	1
mml-miR-340:mml-mir-340	1770.19	1592.96	1888.33	1.18542	0.245401	0.645974	1
mml-miR-139-3p:mml-mir-139	2.03738	0.988608	2.73656	2.76809	1.46889	0.646126	1
mml-miR-423-3p:mml-mir-423	805.83	913.782	733.862	0.803105	-0.31634	0.648885	1
mml-miR-598:mml-mir-598	37.9417	46.4459	32.2723	0.694836	-0.525256	0.653444	1
mml-miR-628-5p:mml-mir-628	124.59	143.443	112.022	0.780948	-0.356702	0.654996	1
mml-miR-33a:mml-mir-33a	4.02169	4.61935	3.62324	0.784361	-0.350411	0.658484	1
mml-miR-708:mml-mir-708	121.812	110.347	129.455	1.17316	0.230397	0.659749	1
mml-miR-324-3p:mml-mir-324	8.82442	7.44612	9.74329	1.30851	0.38792	0.661543	1
mml-miR-132:mml-mir-132	45.1524	51.0735	41.205	0.806779	-0.309755	0.662726	1
mml-miR-504:mml-mir-504	7.33646	6.90312	7.62536	1.10463	0.143558	0.663113	1
mml-miR-362-5p:mml-mir-362	36.3776	39.3116	34.4216	0.87561	-0.19164	0.666349	1
mml-miR-126:mml-mir-126	2058.56	2250.38	1930.68	0.857938	-0.221055	0.667337	1
mml-miR-376c:mml-mir-376c	21.5338	18.9517	23.2553	1.22708	0.295227	0.668838	1
mml-miR-224:mml-mir-224	6.51433	4.87993	7.60392	1.5582	0.639884	0.671374	1
mml-miR-589:mml-mir-589	0.54691	0	0.911517	Inf	Inf	0.676785	1
mml-miR-671-5p:mml-mir-671	5.2802	6.35196	4.56569	0.718784	-0.476369	0.682568	1
mml-miR-182:mml-mir-182	183.867	209.477	166.794	0.79624	-0.328725	0.685822	1
mml-miR-383:mml-mir-383	5.02439	3.43288	6.08539	1.77268	0.825932	0.687153	1
mml-miR-196a:mml-mir-196a-1	877.917	929.15	843.762	0.908101	-0.139075	0.688287	1
mml-miR-548d-3p:mml-mir-548d	1.39055	0.686575	1.85986	2.7089	1.43771	0.692957	1
mml-miR-24-3p:mml-mir-24-1	4686.96	4873.13	4562.84	0.936325	-0.0949179	0.693559	1
mml-miR-24-3p:mml-mir-24-2	4686.96	4873.13	4562.84	0.936325	-0.0949179	0.693559	1
mml-miR-24:mml-mir-24-1	4686.96	4873.13	4562.84	0.936325	-0.0949179	0.693559	1
mml-miR-24:mml-mir-24-2	4686.96	4873.13	4562.84	0.936325	-0.0949179	0.693559	1
mml-miR-543:mml-mir-543	3.6494	2.97925	4.09616	1.37489	0.459321	0.696292	1
mml-miR-877:mml-mir-877	4.65123	5.91725	3.80722	0.643411	-0.636188	0.696347	1
mml-miR-219-5p:mml-mir-219-1	0.772116	1.37041	0.373253	0.272366	-1.87638	0.697226	1
mml-miR-219:mml-mir-219-1	0.772116	1.37041	0.373253	0.272366	-1.87638	0.697226	1
mml-miR-30d:mml-mir-30d	20170.8	22441.4	18657.1	0.831372	-0.266434	0.699089	1
mml-miR-339-3p:mml-mir-339	243.873	235.314	249.579	1.06062	0.0849087	0.700561	1
mml-miR-139-5p:mml-mir-139	81.1073	85.4858	78.1883	0.914634	-0.128733	0.702188	1
mml-miR-135b:mml-mir-135b	0.399661	0.622975	0.250785	0.40256	-1.31272	0.704421	1
mml-miR-330-5p:mml-mir-330	0.978441	0.365632	1.38698	3.79337	1.92348	0.708159	1
mml-miR-30b:mml-mir-30b	2328.56	2183.25	2425.44	1.11093	0.15177	0.722585	1
mml-miR-219-5p:mml-mir-219-2	0.137315	0.343288	0	0	#NAME?	0.729459	1
mml-miR-219:mml-mir-219-2	0.137315	0.343288	0	0	#NAME?	0.729459	1
mml-miR-640:mml-mir-640	0.273534	0.683835	0	0	#NAME?	0.730015	1
mml-miR-664:mml-mir-664	14.9747	15.3513	14.7236	0.959117	-0.0602217	0.730307	1
mml-miR-217b:mml-mir-217b	0.534603	0.686575	0.433287	0.631085	-0.664095	0.734858	1
mml-miR-1262:mml-mir-1262	1.8743	1.89127	1.86299	0.985045	-0.0217382	0.735694	1
mml-miR-133c:mml-mir-133c	337498	363120	320417	0.882402	-0.180492	0.738651	1
mml-let-7g:mml-let-7g	11448.6	12185.9	10957	0.899154	-0.15336	0.739612	1
mml-miR-665:mml-mir-665	1.89935	2.72191	1.35098	0.496334	-1.01062	0.739865	1
mml-miR-582-3p:mml-mir-582	11.5888	10.4343	12.3585	1.18441	0.244172	0.742481	1
mml-miR-1226:mml-mir-1226	5.1414	4.05675	5.86451	1.44562	0.531686	0.74413	1
mml-miR-1185:mml-mir-1185	4.44707	4.74332	4.24957	0.895906	-0.158581	0.748809	1
mml-miR-342-5p:mml-mir-342	2.11456	2.23456	2.03455	0.910495	-0.135277	0.757252	1
mml-miR-485-3p:mml-mir-485	2.31903	1.6501	2.76498	1.67565	0.74472	0.758042	1
mml-miR-493:mml-mir-493	4.79824	3.8434	5.4348	1.41406	0.499843	0.763384	1
mml-miR-3146:mml-mir-3146	0.825232	0.988608	0.716314	0.724569	-0.464805	0.764697	1
mml-miR-379:mml-mir-379	44.7869	46.0945	43.9151	0.952717	-0.0698803	0.768189	1
mml-miR-539:mml-mir-539	1.04158	2.05151	0.368301	0.179527	-2.47773	0.768972	1
mml-miR-296-5p:mml-mir-296	19.2571	16.9198	20.8153	1.23023	0.29893	0.774478	1
mml-miR-503:mml-mir-503	2.00396	1.20469	2.53681	2.10577	1.07435	0.777723	1
mml-miR-502-5p:mml-mir-502	10.9956	10.7793	11.1398	1.03344	0.0474605	0.779773	1
mml-miR-487b:mml-mir-487b	18.5305	16.673	19.7689	1.18568	0.245719	0.780972	1
mml-miR-190a:mml-mir-190a	54.1268	57.4203	51.9311	0.904402	-0.144963	0.782879	1
mml-miR-208a:mml-mir-208a	0.853992	0.279687	1.23686	4.4223	2.1448	0.789439	1
mml-miR-377:mml-mir-377	6.02234	4.70187	6.90265	1.46807	0.553918	0.790722	1
mml-miR-296-3p:mml-mir-296	2.82373	2.85753	2.80119	0.980281	-0.0287322	0.792097	1
mml-miR-331-5p:mml-mir-331	32.7049	32.7854	32.6512	0.995906	-0.00591835	0.792242	1
mml-miR-146a:mml-mir-146a	501.394	473.949	519.69	1.09651	0.132921	0.796513	1
mml-miR-491-3p:mml-mir-491	4.07403	3.58332	4.40117	1.22824	0.29659	0.802311	1
mml-miR-101:mml-mir-101-2	16231.4	15618.5	16640	1.0654	0.0913988	0.804705	1
mml-miR-548e:mml-mir-548e	1.22332	0.64532	1.60866	2.49281	1.31777	0.804808	1
mml-miR-101:mml-mir-101-1	16033.1	15429.4	16435.5	1.06521	0.0911328	0.806029	1
mml-miR-577:mml-mir-577	23.5457	22.5673	24.198	1.07226	0.100653	0.815725	1
mml-miR-421:mml-mir-421	72.2141	69.332	74.1354	1.06928	0.096641	0.817024	1
mml-miR-411:mml-mir-411	2010.55	2086.42	1959.96	0.93939	-0.0902046	0.819142	1
mml-miR-1234:mml-mir-1234	0.193154	0.343288	0.0930651	0.2711	-1.88311	0.839234	1
mml-miR-363:mml-mir-363	21.9115	22.3107	21.6453	0.970173	-0.0436864	0.840341	1
mml-miR-550:mml-mir-550	3.46455	3.09028	3.71406	1.20185	0.265258	0.845703	1
mml-miR-140-5p:mml-mir-140	27.2714	25.6627	28.3439	1.10448	0.143368	0.848677	1
mml-miR-99a:mml-mir-99a	3750.28	3470.74	3936.65	1.13424	0.181725	0.850008	1
mml-miR-431:mml-mir-431	7.37003	7.01738	7.60514	1.08376	0.116041	0.850265	1
mml-miR-410:mml-mir-410	225.967	217.516	231.601	1.06475	0.0905207	0.850354	1
mml-miR-320b:mml-mir-320b	19.4684	19.0004	19.7803	1.04104	0.0580312	0.852053	1
mml-miR-488:mml-mir-488	1.51633	1.61158	1.45283	0.90149	-0.149617	0.85236	1
mml-miR-432:mml-mir-432	19.9422	20.2004	19.7701	0.978695	-0.0310682	0.859493	1
mml-miR-4446:mml-mir-4446	0.384419	0	0.640698	Inf	Inf	0.86194	1
mml-miR-491-5p:mml-mir-491	11.0094	10.877	11.0976	1.02029	0.0289765	0.872305	1
mml-miR-195:mml-mir-195	700.05	694.112	704.009	1.01426	0.0204249	0.873124	1
mml-miR-186:mml-mir-186	8208.7	8702.82	7879.28	0.90537	-0.14342	0.873998	1
mml-miR-204:mml-mir-204	331.837	310.905	345.792	1.11221	0.153432	0.875505	1
mml-miR-146b-3p:mml-mir-146b	25.7997	26.419	25.3868	0.960929	-0.0574989	0.88207	1
mml-miR-548d-5p:mml-mir-548d	1.11246	0.686575	1.39638	2.03384	1.0242	0.88668	1
mml-miR-940:mml-mir-940	0.732558	0.343288	0.992071	2.88991	1.53103	0.893598	1
mml-miR-760:mml-mir-760	2.96187	2.75268	3.10134	1.12666	0.172056	0.897656	1
mml-miR-329:mml-mir-329-1	0.221731	0.279687	0.183093	0.654636	-0.611236	0.902657	1
mml-miR-329:mml-mir-329-2	0.221731	0.279687	0.183093	0.654636	-0.611236	0.902657	1
mml-miR-183:mml-mir-183	174.053	171.128	176.004	1.02849	0.0405328	0.90827	1
mml-miR-196b:mml-mir-196b	606.372	630.233	590.465	0.936899	-0.0940343	0.909986	1
mml-miR-656:mml-mir-656	7.00932	7.12469	6.93241	0.973013	-0.0394696	0.911898	1
mml-miR-26a:mml-mir-26a-2	199783	196087	202247	1.03141	0.0446211	0.912241	1
mml-miR-26a:mml-mir-26a-1	199774	196080	202237	1.0314	0.0446086	0.912249	1
mml-miR-582-5p:mml-mir-582	7.00287	6.78189	7.15019	1.05431	0.0762945	0.915001	1
mml-let-7i:mml-let-7i	3658.23	3621.74	3682.56	1.01679	0.0240278	0.924701	1
mml-miR-197:mml-mir-197	567.752	585.733	555.765	0.948837	-0.0757683	0.924952	1
mml-miR-1243:mml-mir-1243	7.15887	6.76797	7.41947	1.09626	0.132593	0.925207	1
mml-miR-514b:mml-mir-514b	0.331712	0	0.552853	Inf	Inf	0.93014	1
mml-miR-636:mml-mir-636	0.330837	0	0.551394	Inf	Inf	0.931144	1
mml-miR-615-5p:mml-mir-615	0.254406	0.365632	0.180255	0.492994	-1.02036	0.93211	1
mml-miR-944:mml-mir-944	2.62258	1.91361	3.09522	1.61747	0.693741	0.93539	1
mml-miR-31:mml-mir-31	66.5259	58.4235	71.9276	1.23114	0.299996	0.93753	1
mml-miR-337-3p:mml-mir-337	12.2332	11.4281	12.7699	1.11741	0.160162	0.944456	1
mml-miR-146b-5p:mml-mir-146b	4226.45	4067.47	4332.43	1.06514	0.091045	0.948807	1
mml-miR-3140:mml-mir-3140	0.313356	0	0.522259	Inf	Inf	0.96255	1
mml-miR-152:mml-mir-152	414.12	396.621	425.786	1.07353	0.102366	0.964291	1
mml-miR-490-3p:mml-mir-490	0.303887	0	0.506478	Inf	Inf	0.972882	1
mml-miR-624:mml-mir-624	3.32517	2.79119	3.68116	1.31885	0.399279	0.980152	1
mml-miR-130a:mml-mir-130a	222.902	220.076	224.787	1.0214	0.0305544	0.98252	1
mml-miR-133b:mml-mir-133b	36152.2	36116.5	36176	1.00165	0.00237778	0.989286	1
mml-miR-668:mml-mir-668	0.672839	0.343288	0.892539	2.59997	1.3785	0.999153	1
mml-miR-105:mml-mir-105-1	0.0552853	0	0.0921422	Inf	Inf	1	1
mml-miR-105:mml-mir-105-2	0.0552853	0	0.0921422	Inf	Inf	1	1
mml-miR-1225-3p:mml-mir-1225	0.0523137	0	0.0871896	Inf	Inf	1	1
mml-miR-1232:mml-mir-1232	0.0552853	0	0.0921422	Inf	Inf	1	1
mml-miR-124a:mml-mir-124a-1	1.32078	1.37658	1.28358	0.932438	-0.100921	1	1
mml-miR-124a:mml-mir-124a-2	1.32078	1.37658	1.28358	0.932438	-0.100921	1	1
mml-miR-125a-3p:mml-mir-125a	2.14336	1.99956	2.23923	1.11986	0.163317	1	1
mml-miR-1277:mml-mir-1277	0.629463	0.365632	0.80535	2.20262	1.13922	1	1
mml-miR-1284:mml-mir-1284	1.90335	1.88853	1.91323	1.01308	0.0187433	1	1
mml-miR-1296:mml-mir-1296	93.1557	95.4333	91.6373	0.960224	-0.0585578	1	1
mml-miR-1298:mml-mir-1298	0.566654	0.365632	0.700668	1.91632	0.938337	1	1
mml-miR-137:mml-mir-137	0.205756	0	0.342927	Inf	Inf	1	1
mml-miR-153:mml-mir-153-1	12.619	13.4901	12.0383	0.892384	-0.164263	1	1
mml-miR-153:mml-mir-153-2	12.619	13.4901	12.0383	0.892384	-0.164263	1	1
mml-miR-200a:mml-mir-200a	1.16944	1.0969	1.21779	1.11022	0.150842	1	1
mml-miR-2114:mml-mir-2114	0.0575423	0	0.0959039	Inf	Inf	1	1
mml-miR-219-3p:mml-mir-219-2	0.0523137	0	0.0871896	Inf	Inf	1	1
mml-miR-299-3p:mml-mir-299	71.6737	73.3363	70.5653	0.962216	-0.0555671	1	1
mml-miR-3151:mml-mir-3151	0.094632	0	0.15772	Inf	Inf	1	1
mml-miR-3154:mml-mir-3154	0.0575423	0	0.0959039	Inf	Inf	1	1
mml-miR-3173:mml-mir-3173	0.107599	0	0.179332	Inf	Inf	1	1
mml-miR-320c:mml-mir-320c	0.0575423	0	0.0959039	Inf	Inf	1	1
mml-miR-330-3p:mml-mir-330	0.404323	0.365632	0.430117	1.17636	0.234335	1	1
mml-miR-337-5p:mml-mir-337	2.54619	2.17145	2.79601	1.28762	0.364711	1	1
mml-miR-33b:mml-mir-33b	0.978402	0.64532	1.20046	1.86025	0.895496	1	1
mml-miR-367:mml-mir-367	0.152174	0	0.253624	Inf	Inf	1	1
mml-miR-371-5p:mml-mir-371-1	0.0575423	0	0.0959039	Inf	Inf	1	1
mml-miR-371-5p:mml-mir-371-2	0.0575423	0	0.0959039	Inf	Inf	1	1
mml-miR-372:mml-mir-372	0.263852	0	0.439754	Inf	Inf	1	1
mml-miR-3927:mml-mir-3927	0.112828	0	0.188046	Inf	Inf	1	1
mml-miR-429:mml-mir-429	0.592319	0.365632	0.743443	2.03331	1.02383	1	1
mml-miR-448:mml-mir-448	0.0575423	0	0.0959039	Inf	Inf	1	1
mml-miR-449b:mml-mir-449b	0.260488	0	0.434147	Inf	Inf	1	1
mml-miR-4650:mml-mir-4650	0.0558391	0	0.0930651	Inf	Inf	1	1
mml-miR-4743:mml-mir-4743	0.0558391	0	0.0930651	Inf	Inf	1	1
mml-miR-490-5p:mml-mir-490	0.0523137	0	0.0871896	Inf	Inf	1	1
mml-miR-494:mml-mir-494	0.792388	1.04947	0.621002	0.59173	-0.756988	1	1
mml-miR-509:mml-mir-509-1	0.094632	0	0.15772	Inf	Inf	1	1
mml-miR-509:mml-mir-509-2	0.094632	0	0.15772	Inf	Inf	1	1
mml-miR-512-3p:mml-mir-512	0.0523137	0	0.0871896	Inf	Inf	1	1
mml-miR-516a-5p:mml-mir-516a-1	0.110571	0	0.184284	Inf	Inf	1	1
mml-miR-516a-5p:mml-mir-516a-2	0.110571	0	0.184284	Inf	Inf	1	1
mml-miR-518a-5p:mml-mir-518a	0.0558391	0	0.0930651	Inf	Inf	1	1
mml-miR-519c:mml-mir-519c	0.0523137	0	0.0871896	Inf	Inf	1	1
mml-miR-525:mml-mir-525	0.215198	0	0.358664	Inf	Inf	1	1
mml-miR-542-5p:mml-mir-542	0.929766	0.731265	1.0621	1.45242	0.538454	1	1
mml-miR-548c:mml-mir-548c	0.0575423	0	0.0959039	Inf	Inf	1	1
mml-miR-578:mml-mir-578	0.107599	0	0.179332	Inf	Inf	1	1
mml-miR-580:mml-mir-580	0.268066	0	0.446776	Inf	Inf	1	1
mml-miR-590-5p:mml-mir-590	0.628294	0.279687	0.860699	3.07736	1.62169	1	1
mml-miR-599:mml-mir-599	0.397088	0.343288	0.432956	1.2612	0.334801	1	1
mml-miR-615-3p:mml-mir-615	28.9886	28.5271	29.2964	1.02697	0.03839	1	1
mml-miR-627:mml-mir-627	0.170924	0	0.284873	Inf	Inf	1	1
mml-miR-663:mml-mir-663-1	0.0523137	0	0.0871896	Inf	Inf	1	1
mml-miR-663:mml-mir-663-10	0.0523137	0	0.0871896	Inf	Inf	1	1
mml-miR-663:mml-mir-663-11	0.0523137	0	0.0871896	Inf	Inf	1	1
mml-miR-663:mml-mir-663-2	0.0523137	0	0.0871896	Inf	Inf	1	1
mml-miR-663:mml-mir-663-3	0.0523137	0	0.0871896	Inf	Inf	1	1
mml-miR-663:mml-mir-663-4	0.0523137	0	0.0871896	Inf	Inf	1	1
mml-miR-663:mml-mir-663-5	0.0523137	0	0.0871896	Inf	Inf	1	1
mml-miR-663:mml-mir-663-6	0.0523137	0	0.0871896	Inf	Inf	1	1
mml-miR-663:mml-mir-663-7	0.0523137	0	0.0871896	Inf	Inf	1	1
mml-miR-663:mml-mir-663-8	0.0523137	0	0.0871896	Inf	Inf	1	1
mml-miR-663:mml-mir-663-9	0.0523137	0	0.0871896	Inf	Inf	1	1
mml-miR-767-5p:mml-mir-767	0.221695	0	0.369492	Inf	Inf	1	1
mml-miR-770-5p:mml-mir-770	0.110571	0	0.184284	Inf	Inf	1	1
mml-miR-873:mml-mir-873	0.094632	0	0.15772	Inf	Inf	1	1
mml-miR-875-5p:mml-mir-875	0.111124	0	0.185207	Inf	Inf	1	1
mml-miR-933:mml-mir-933	0.150471	0	0.250785	Inf	Inf	1	1
mml-miR-937:mml-mir-937	0.170924	0	0.284873	Inf	Inf	1	1
mml-miR-96:mml-mir-96	6.28392	5.70595	6.66923	1.16882	0.225054	1	1

## Sheet: miRNA_in_miRBase_read_counts
miRNA_ID:precursor_ID	miRNAs_1Y	miRNAs_3Y	miRNAs_33Y	miRNAs_64Y	miRNAs_65Y	miRNAs_192O	miRNAs_509O	miRNAs_652O	miRNAs_12352O	miRNAs_17517O	miRNAs_22383O
mml-let-7a:mml-let-7a-1	18671	28207	6299	14291	946	28365	49626	26763	14561	22020	27601
mml-let-7a:mml-let-7a-2	18785	28312	6331	14347	949	28538	49840	26920	14613	22069	27718
mml-let-7a:mml-let-7a-3	18715	28216	6304	14308	949	28401	49645	26806	14585	22029	27652
mml-let-7b:mml-let-7b	6449	5679	1935	6883	346	10684	13690	10688	6368	4352	8764
mml-let-7c:mml-let-7c	2864	3721	967	3233	234	5064	6081	4897	2683	2306	4102
mml-let-7d:mml-let-7d	1450	1817	489	1008	31	1801	3350	1774	894	953	2221
mml-let-7e:mml-let-7e	375	445	144	349	36	508	588	465	299	259	467
mml-let-7f:mml-let-7f-1	40317	25291	14579	28338	1216	58268	42887	59789	28397	14932	55611
mml-let-7f:mml-let-7f-2	40448	25404	14640	28457	1218	58512	43097	59994	28518	14995	55822
mml-let-7g:mml-let-7g	11506	8120	4663	8186	355	19665	22031	19696	10860	5126	20189
mml-let-7i:mml-let-7i	2672	3497	1057	2543	197	5047	9124	4891	2480	2772	6664
mml-miR-1:mml-mir-1-1	322	187	175	249	4	520	300	635	236	86	368
mml-miR-1:mml-mir-1-2	426	240	235	314	4	742	390	944	453	125	487
mml-miR-100:mml-mir-100	2582	2657	989	4599	403	12497	9705	14445	12403	10392	8918
mml-miR-101:mml-mir-101-1	14856	8614	5921	11873	505	27007	31710	39219	16816	5548	30999
mml-miR-101:mml-mir-101-2	15039	8728	6001	11994	510	27379	32166	39721	17022	5606	31322
mml-miR-103:mml-mir-103-1	840	852	345	751	71	2519	4173	2724	1385	630	2218
mml-miR-103:mml-mir-103-2	843	856	350	756	71	2527	4187	2730	1391	632	2225
mml-miR-105:mml-mir-105-1	0	0	0	0	0	0	0	0	0	0	1
mml-miR-105:mml-mir-105-2	0	0	0	0	0	0	0	0	0	0	1
mml-miR-106a:mml-mir-106a	3	0	0	1	0	6	14	8	3	0	5
mml-miR-106b:mml-mir-106b	54	48	29	42	5	1062	1720	848	335	80	165
mml-miR-107:mml-mir-107	320	277	148	277	18	994	2018	1145	530	279	824
mml-miR-10a:mml-mir-10a	110530	82590	33593	73513	5821	119041	78781	98847	157997	52438	132436
mml-miR-10b:mml-mir-10b	1024867	659131	455545	919666	54359	786243	711591	1070970	2071529	784130	1713383
mml-miR-1179:mml-mir-1179	0	0	0	0	0	0	0	0	0	0	0
mml-miR-1185:mml-mir-1185	7	2	2	2	1	5	4	6	6	4	6
mml-miR-1224-3p:mml-mir-1224	0	0	0	0	0	0	0	0	0	0	0
mml-miR-1224-5p:mml-mir-1224	0	0	0	0	0	0	0	0	0	0	0
mml-miR-1225-3p:mml-mir-1225	0	0	0	0	0	0	1	0	0	0	0
mml-miR-1225-5p:mml-mir-1225	0	0	0	0	0	0	0	0	0	0	0
mml-miR-1226:mml-mir-1226	7	2	2	0	0	6	12	8	3	4	18
mml-miR-1227:mml-mir-1227	0	0	0	0	0	0	0	0	0	0	0
mml-miR-122a:mml-mir-122a	0	0	1	2	0	5	3	7	10	1	0
mml-miR-1230:mml-mir-1230	0	0	0	0	0	0	0	0	0	0	0
mml-miR-1232:mml-mir-1232	0	0	0	0	0	0	0	0	0	0	1
mml-miR-1233:mml-mir-1233	0	0	0	0	0	0	0	0	0	0	0
mml-miR-1234:mml-mir-1234	0	0	0	1	0	1	0	0	0	0	0
mml-miR-1235:mml-mir-1235	8	7	10	13	0	25	0	29	13	4	20
mml-miR-1239:mml-mir-1239	0	0	0	0	0	0	0	0	0	0	0
mml-miR-1240:mml-mir-1240	7	2	1	11	0	5	5	4	1	2	9
mml-miR-1241:mml-mir-1241	0	0	0	0	0	0	0	0	0	0	0
mml-miR-1243:mml-mir-1243	9	6	1	4	0	4	9	9	11	4	25
mml-miR-1249:mml-mir-1249	2	7	2	7	0	30	21	21	26	3	23
mml-miR-124a:mml-mir-124a-1	1	3	0	0	0	1	3	2	0	0	8
mml-miR-124a:mml-mir-124a-2	1	3	0	0	0	1	3	2	0	0	8
mml-miR-1250:mml-mir-1250	0	0	0	0	0	0	0	0	0	0	0
mml-miR-1255b:mml-mir-1255b	4	2	0	2	0	21	6	3	12	1	26
mml-miR-1258:mml-mir-1258	0	0	0	0	0	0	0	0	0	0	0
mml-miR-125a-3p:mml-mir-125a	2	3	0	1	2	7	2	5	3	0	5
mml-miR-125a-5p:mml-mir-125a	5121	4710	1894	4964	537	7729	7558	7440	2087	1509	8189
mml-miR-125b:mml-mir-125b-1	5512	4433	2461	5610	498	8614	10804	10514	2388	1824	7203
mml-miR-125b:mml-mir-125b-2	5545	4461	2473	5656	501	8661	10840	10578	2396	1842	7226
mml-miR-126:mml-mir-126	2376	1321	929	1362	125	2999	3155	3964	2193	659	4626
mml-miR-1260b:mml-mir-1260b	365	250	89	247	27	239	306	299	286	113	1140
mml-miR-1262:mml-mir-1262	3	1	0	2	0	0	1	1	4	2	4
mml-miR-127:mml-mir-127	5696	7061	2568	6505	794	12788	10888	7107	6234	4887	15469
mml-miR-1271:mml-mir-1271	207	130	81	241	5	1888	976	1335	1172	284	1089
mml-miR-1277:mml-mir-1277	0	1	0	0	0	2	1	2	0	1	0
mml-miR-1283:mml-mir-1283	0	0	0	0	0	0	0	0	0	0	0
mml-miR-1284:mml-mir-1284	3	1	1	0	0	5	3	4	1	0	7
mml-miR-128a:mml-mir-128a	751	496	369	653	21	883	1069	876	551	341	1535
mml-miR-128b:mml-mir-128b	1466	938	746	1284	37	1452	1660	1514	796	512	2799
mml-miR-129-3p:mml-mir-129-1	0	1	0	0	0	2	0	0	1	1	11
mml-miR-129-5p:mml-mir-129-1	0	1	0	0	0	16	32	7	8	2	111
mml-miR-129-5p:mml-mir-129-2	0	1	0	0	0	16	32	7	8	2	111
mml-miR-129:mml-mir-129-1	0	1	0	0	0	16	32	7	8	2	111
mml-miR-129:mml-mir-129-2	0	1	0	0	0	16	32	7	8	2	111
mml-miR-1296:mml-mir-1296	102	50	45	52	4	187	198	182	68	44	150
mml-miR-1298:mml-mir-1298	0	1	0	0	0	0	2	0	1	0	4
mml-miR-1304:mml-mir-1304	6	5	2	6	0	19	33	16	6	1	21
mml-miR-130a:mml-mir-130a	174	153	80	177	26	354	479	412	203	135	354
mml-miR-130b:mml-mir-130b	4	4	0	5	0	24	40	12	4	0	23
mml-miR-132:mml-mir-132	33	32	24	40	5	46	83	77	38	26	81
mml-miR-1323:mml-mir-1323	42	44	18	38	1	16	6	26	17	11	45
mml-miR-133a:mml-mir-133a	72	44	79	209	1	110	160	194	62	34	145
mml-miR-133b:mml-mir-133b	35533	23077	15462	20878	602	61557	51534	74370	50067	15982	59556
mml-miR-133c:mml-mir-133c	341923	237575	154098	219190	6109	564460	527123	679771	349985	141000	581304
mml-miR-134:mml-mir-134	44	60	14	52	9	58	59	53	38	47	49
mml-miR-135a:mml-mir-135a-1	0	0	0	0	0	4	1	1	3	2	2
mml-miR-135a:mml-mir-135a-2	0	0	0	0	0	4	1	1	3	2	2
mml-miR-135b:mml-mir-135b	1	0	0	1	0	1	0	0	1	0	0
mml-miR-136:mml-mir-136	53	81	17	71	9	114	86	107	64	47	120
mml-miR-137:mml-mir-137	0	0	0	0	0	1	0	0	1	0	1
mml-miR-138:mml-mir-138	0	0	0	0	0	5	7	4	0	1	4
mml-miR-139-3p:mml-mir-139	1	1	0	1	1	1	2	3	7	1	8
mml-miR-139-5p:mml-mir-139	74	46	33	74	3	106	73	86	154	38	179
mml-miR-140-3p:mml-mir-140	749	640	306	785	58	2628	3709	2644	1138	376	2440
mml-miR-140-5p:mml-mir-140	22	14	10	22	2	49	37	43	38	12	69
mml-miR-141:mml-mir-141	9	9	2	9	0	262	399	42	310	14	763
mml-miR-142-3p:mml-mir-142	17	10	9	15	1	388	447	283	63	30	87
mml-miR-142-5p:mml-mir-142	301	305	135	249	35	11794	20129	9802	1244	623	2450
mml-miR-143:mml-mir-143	186056	145280	56670	126673	15464	282051	175892	203652	133329	70541	430207
mml-miR-144:mml-mir-144	24	10	10	31	0	5578	5270	3961	532	129	68
mml-miR-145:mml-mir-145	340	308	123	200	32	1047	583	959	911	271	1321
mml-miR-146a:mml-mir-146a	333	482	133	331	103	686	928	1056	320	269	1429
mml-miR-146b-3p:mml-mir-146b	22	17	9	23	0	42	48	41	12	18	58
mml-miR-146b-5p:mml-mir-146b	3792	2746	1457	2932	187	7420	7164	5174	3633	3043	9906
mml-miR-147a:mml-mir-147a	0	0	0	0	0	0	0	0	0	0	0
mml-miR-147b:mml-mir-147b	0	0	0	0	0	4	5	0	2	1	6
mml-miR-148a:mml-mir-148a	15387	18075	6564	12101	1286	27929	37036	36782	13511	6906	28196
mml-miR-148b:mml-mir-148b	814	925	372	771	64	2477	2582	1764	3703	1269	1971
mml-miR-149:mml-mir-149	70	54	33	58	0	121	129	97	48	33	105
mml-miR-150:mml-mir-150	615	197	111	313	10	458	342	406	271	122	724
mml-miR-151-3p:mml-mir-151	5127	3078	2019	3817	210	5788	7995	5033	1995	1190	6198
mml-miR-151-5p:mml-mir-151	5744	3782	2288	4370	243	8826	7725	7696	4463	1900	8873
mml-miR-152:mml-mir-152	332	289	118	342	28	599	726	589	595	291	623
mml-miR-153:mml-mir-153-1	11	6	7	10	0	44	24	15	10	4	16
mml-miR-153:mml-mir-153-2	11	6	7	10	0	44	24	15	10	4	16
mml-miR-154:mml-mir-154	7	4	1	2	2	15	15	18	8	9	13
mml-miR-155:mml-mir-155	31	34	20	36	3	108	84	78	70	43	304
mml-miR-15a:mml-mir-15a	495	374	173	360	19	2231	3852	2831	818	618	1260
mml-miR-15b:mml-mir-15b	84	66	29	49	9	1213	1623	845	105	58	179
mml-miR-16:mml-mir-16-1	5656	4310	1975	4117	265	32749	61219	35584	6204	5382	11633
mml-miR-16:mml-mir-16-2	5659	4313	1976	4121	265	32786	61268	35619	6215	5389	11641
mml-miR-17-3p:mml-mir-17	13	5	6	8	2	104	125	91	16	7	28
mml-miR-17-5p:mml-mir-17	135	55	51	87	2	1108	1341	978	339	88	347
mml-miR-181a-3p:mml-mir-181a-1	182	192	104	261	9	144	261	377	87	41	299
mml-miR-181a-5p:mml-mir-181a-1	27077	16463	11158	23751	1239	31984	40689	28660	4866	5920	26917
mml-miR-181a-5p:mml-mir-181a-2	27077	16463	11158	23751	1239	31984	40689	28660	4866	5920	26917
mml-miR-181a:mml-mir-181a-1	27077	16463	11158	23751	1239	31984	40689	28660	4866	5920	26917
mml-miR-181a:mml-mir-181a-2	27077	16463	11158	23751	1239	31984	40689	28660	4866	5920	26917
mml-miR-181b:mml-mir-181b-1	924	528	393	747	41	1147	1579	969	249	232	580
mml-miR-181b:mml-mir-181b-2	931	538	401	760	41	1168	1593	990	267	240	588
mml-miR-181c:mml-mir-181c	1201	611	476	1164	68	1526	1187	1567	1060	397	1949
mml-miR-181d:mml-mir-181d	129	49	30	125	10	156	140	118	111	32	201
mml-miR-182:mml-mir-182	94	64	68	330	7	236	186	73	114	92	785
mml-miR-183:mml-mir-183	74	56	55	269	3	121	75	58	347	115	638
mml-miR-184:mml-mir-184	0	0	0	0	0	2	3	2	5	1	8
mml-miR-185:mml-mir-185	20	13	8	17	0	88	117	61	45	16	70
mml-miR-186:mml-mir-186	8512	4958	3673	5819	289	16138	20220	14580	5932	2593	15176
mml-miR-187:mml-mir-187	4	13	1	2	1	32	24	27	2	1	26
mml-miR-188:mml-mir-188	10	6	5	6	0	25	22	18	28	7	23
mml-miR-18a:mml-mir-18a	2	7	3	2	1	172	197	93	55	17	27
mml-miR-18b:mml-mir-18b	0	0	0	0	0	7	9	4	0	1	0
mml-miR-190a:mml-mir-190a	57	31	24	40	2	59	92	95	87	19	99
mml-miR-190b:mml-mir-190b	49	5	29	42	0	42	38	34	24	12	108
mml-miR-191:mml-mir-191	48723	36166	20056	44452	2135	103366	97662	70352	42557	22825	95976
mml-miR-192:mml-mir-192	404	270	173	221	15	1804	2747	1414	754	114	2521
mml-miR-193a-3p:mml-mir-193a	4	6	3	2	0	30	9	20	44	5	14
mml-miR-193a-5p:mml-mir-193a	18	6	5	18	0	16	27	24	16	11	20
mml-miR-193b:mml-mir-193b	1708	1710	834	1142	44	5110	4192	5742	3705	1592	3462
mml-miR-194:mml-mir-194-1	10	5	6	11	3	121	151	83	50	3	121
mml-miR-194:mml-mir-194-2	10	5	5	10	2	118	139	81	44	1	98
mml-miR-195:mml-mir-195	686	503	212	505	56	1233	933	1406	769	411	1215
mml-miR-196a:mml-mir-196a-1	750	666	348	693	39	1505	1623	1241	854	592	1162
mml-miR-196a:mml-mir-196a-2	1372	939	637	1114	60	2712	2624	2106	1327	744	1754
mml-miR-196b:mml-mir-196b	443	418	283	466	31	1137	1110	900	679	343	844
mml-miR-197:mml-mir-197	575	310	301	308	24	1162	1189	940	390	218	1282
mml-miR-198:mml-mir-198	0	0	0	0	0	0	0	0	0	0	0
mml-miR-199a-3p:mml-mir-199a-1	2614	3951	1125	5086	472	5992	9959	7843	2480	2330	6619
mml-miR-199a-3p:mml-mir-199a-2	2573	3913	1115	5027	470	5929	9816	7759	2471	2316	6552
mml-miR-199a-5p:mml-mir-199a-1	616	697	245	1039	90	1381	1422	1318	649	402	1008
mml-miR-199a-5p:mml-mir-199a-2	616	697	245	1039	90	1381	1422	1318	649	402	1007
mml-miR-199a:mml-mir-199a-1	616	697	245	1039	90	1381	1422	1318	649	402	1008
mml-miR-199a:mml-mir-199a-2	616	697	245	1039	90	1381	1422	1318	649	402	1007
mml-miR-19a:mml-mir-19a	28	20	5	21	0	250	323	201	45	10	70
mml-miR-19b:mml-mir-19b-1	187	134	92	129	4	1053	1263	908	317	85	382
mml-miR-19b:mml-mir-19b-2	187	134	92	129	4	1051	1265	907	317	85	382
mml-miR-200a:mml-mir-200a	0	3	0	0	1	0	1	0	6	0	2
mml-miR-200c:mml-mir-200c	0	1	0	0	0	13	19	0	23	0	49
mml-miR-203:mml-mir-203	0	22	0	0	0	3	6	3	4	2	5
mml-miR-204:mml-mir-204	228	289	113	187	19	391	404	313	649	218	734
mml-miR-205:mml-mir-205	1	6	0	0	0	0	1	0	0	1	0
mml-miR-206:mml-mir-206	132	173	83	83	1	202	152	207	141	84	140
mml-miR-208a:mml-mir-208a	1	0	0	0	0	0	0	0	2	0	10
mml-miR-208b:mml-mir-208b	1431	71	438	1305	5	725	649	587	319	17	3280
mml-miR-20a:mml-mir-20a	196	95	70	82	5	1407	1566	1274	447	135	395
mml-miR-20b:mml-mir-20b	0	1	0	0	0	5	9	2	1	0	1
mml-miR-21:mml-mir-21	11534	7406	4756	9948	415	28329	25220	32661	26043	13970	31415
mml-miR-210:mml-mir-210	56	54	22	41	2	198	309	189	107	54	67
mml-miR-211:mml-mir-211	4	6	1	4	0	3	10	2	7	3	113
mml-miR-2114:mml-mir-2114	0	0	0	0	0	0	0	1	0	0	0
mml-miR-212:mml-mir-212	24	22	12	19	1	33	42	40	14	15	33
mml-miR-214:mml-mir-214	129	115	53	230	20	280	251	215	175	141	268
mml-miR-215:mml-mir-215	13	12	3	9	0	45	166	51	61	15	200
mml-miR-216a:mml-mir-216a	1	0	0	5	0	8	2	0	0	0	0
mml-miR-216b:mml-mir-216b	1	0	0	7	1	3	3	0	0	1	0
mml-miR-217a:mml-mir-217a	0	0	0	0	0	0	0	0	0	0	0
mml-miR-217b:mml-mir-217b	0	0	0	2	0	1	0	0	0	1	0
mml-miR-218:mml-mir-218-1	7	20	2	12	1	42	56	28	19	13	27
mml-miR-218:mml-mir-218-2	7	20	2	12	1	42	56	28	19	13	27
mml-miR-219-3p:mml-mir-219-2	0	0	0	0	0	0	1	0	0	0	0
mml-miR-219-5p:mml-mir-219-1	0	0	1	2	0	1	0	1	0	0	2
mml-miR-219-5p:mml-mir-219-2	0	0	0	1	0	0	0	0	0	0	0
mml-miR-219:mml-mir-219-1	0	0	1	2	0	1	0	1	0	0	2
mml-miR-219:mml-mir-219-2	0	0	0	1	0	0	0	0	0	0	0
mml-miR-22:mml-mir-22	349029	220455	141247	229898	6879	477572	558763	602712	184606	74387	658625
mml-miR-221:mml-mir-221	109	170	57	133	22	1026	1757	907	282	157	698
mml-miR-222:mml-mir-222	58	75	28	65	14	204	385	210	105	35	260
mml-miR-223:mml-mir-223	9	20	6	8	1	150	181	211	44	17	96
mml-miR-224:mml-mir-224	2	9	0	3	2	8	24	17	6	4	9
mml-miR-23a:mml-mir-23a	2636	1436	1010	2015	131	2899	2819	2654	2722	930	4548
mml-miR-23b:mml-mir-23b	4077	2229	1887	2852	107	5166	5033	4651	3898	1318	8738
mml-miR-24-3p:mml-mir-24-1	5404	2313	1740	3863	166	6964	5420	6909	6949	2131	10403
mml-miR-24-3p:mml-mir-24-2	5404	2313	1740	3863	166	6964	5420	6909	6949	2131	10403
mml-miR-24-5p:mml-mir-24-1	39	23	13	32	0	46	36	46	64	13	88
mml-miR-24:mml-mir-24-1	5404	2313	1740	3863	166	6964	5420	6909	6949	2131	10403
mml-miR-24:mml-mir-24-2	5404	2313	1740	3863	166	6964	5420	6909	6949	2131	10403
mml-miR-25:mml-mir-25	1622	1292	763	1440	99	8411	15041	7339	1751	797	3476
mml-miR-26a:mml-mir-26a-1	198300	132216	77447	114523	6956	396020	315498	420758	184829	92646	399923
mml-miR-26a:mml-mir-26a-2	198308	132223	77449	114526	6956	396026	315507	420773	184850	92651	399938
mml-miR-26b:mml-mir-26b	11039	6309	5503	7567	321	13429	15003	15721	9877	2887	17031
mml-miR-27a:mml-mir-27a	71602	40283	30439	58196	2172	67964	88887	75422	37800	16566	142336
mml-miR-27b:mml-mir-27b	140351	81891	58521	108154	3739	130512	164536	158873	69722	32373	277373
mml-miR-28:mml-mir-28	1071	497	379	649	32	1303	1133	1355	911	300	2526
mml-miR-296-3p:mml-mir-296	4	1	0	4	0	4	6	4	3	2	4
mml-miR-296-5p:mml-mir-296	15	17	5	9	0	25	23	57	29	10	33
mml-miR-297:mml-mir-297	0	0	0	0	0	0	0	0	0	0	0
mml-miR-298:mml-mir-298	0	0	0	0	0	0	0	0	0	0	0
mml-miR-299-3p:mml-mir-299	45	64	25	59	4	111	158	115	94	24	135
mml-miR-299-5p:mml-mir-299	21	35	14	14	3	67	45	64	66	38	100
mml-miR-29a:mml-mir-29a	2464	1835	991	1608	78	4930	4870	5923	3003	734	9361
mml-miR-29b:mml-mir-29b-1	125	118	55	88	3	407	334	398	463	89	733
mml-miR-29b:mml-mir-29b-2	124	118	55	88	3	407	334	398	463	89	732
mml-miR-29c:mml-mir-29c	1420	943	606	896	25	3334	3647	4429	2310	536	4433
mml-miR-301a:mml-mir-301a	70	57	36	57	4	184	309	238	65	48	149
mml-miR-301b:mml-mir-301b	0	0	2	0	0	8	7	3	3	0	8
mml-miR-302a:mml-mir-302a	0	0	0	0	0	0	1	1	5	1	0
mml-miR-302b:mml-mir-302b	0	0	0	0	0	0	4	2	10	1	1
mml-miR-302c:mml-mir-302c	0	0	0	0	0	0	0	0	0	0	0
mml-miR-302d:mml-mir-302d	1	0	0	0	0	6	1	1	5	0	1
mml-miR-30a-3p:mml-mir-30a	3828	2174	1882	2792	99	4324	4514	5327	3103	1120	6335
mml-miR-30a-5p:mml-mir-30a	39602	20705	17422	28506	823	52038	41519	65723	35666	13327	58548
mml-miR-30b:mml-mir-30b	2116	1336	891	1438	64	3652	3470	4878	3395	857	5298
mml-miR-30c:mml-mir-30c-1	8205	4596	3945	5481	184	11477	11573	11360	8072	2488	13105
mml-miR-30c:mml-mir-30c-2	8206	4600	3945	5482	184	11483	11576	11365	8073	2488	13108
mml-miR-30d:mml-mir-30d	20857	13019	10322	13951	565	31423	36901	40183	15985	6672	42006
mml-miR-30e:mml-mir-30e	24007	12721	10154	16246	327	34477	29097	34707	18195	6139	25424
mml-miR-31:mml-mir-31	51	41	4	77	0	110	46	321	85	28	43
mml-miR-3122:mml-mir-3122	0	0	0	0	0	5	8	2	0	1	2
mml-miR-3140:mml-mir-3140	0	0	0	0	0	1	1	0	1	0	2
mml-miR-3145:mml-mir-3145	0	0	0	0	0	0	0	0	0	0	0
mml-miR-3146:mml-mir-3146	1	1	0	1	0	0	0	2	0	1	2
mml-miR-3151:mml-mir-3151	0	0	0	0	0	0	0	0	1	0	0
mml-miR-3154:mml-mir-3154	0	0	0	0	0	0	0	1	0	0	0
mml-miR-3173:mml-mir-3173	0	0	0	0	0	0	1	0	0	0	1
mml-miR-32:mml-mir-32	31	16	15	13	2	189	416	200	68	24	82
mml-miR-3200:mml-mir-3200	0	0	1	2	0	11	30	9	1	0	5
mml-miR-320a:mml-mir-320a	546	376	256	507	40	1079	1205	942	424	248	953
mml-miR-320b:mml-mir-320b	17	9	11	10	4	40	37	35	19	12	26
mml-miR-320c:mml-mir-320c	0	0	0	0	0	0	0	1	0	0	0
mml-miR-323-3p:mml-mir-323	0	4	1	2	1	1	1	0	2	0	1
mml-miR-323-5p:mml-mir-323	0	0	0	0	0	0	0	0	0	0	0
mml-miR-324-3p:mml-mir-324	4	7	3	5	0	15	29	14	10	5	13
mml-miR-324-5p:mml-mir-324	9	3	3	7	0	18	25	19	26	5	17
mml-miR-325:mml-mir-325	0	0	0	0	0	0	0	0	0	0	0
mml-miR-329:mml-mir-329-1	1	0	0	0	0	0	1	1	0	0	0
mml-miR-329:mml-mir-329-2	1	0	0	0	0	0	1	1	0	0	0
mml-miR-330-3p:mml-mir-330	0	1	0	0	0	1	1	0	1	0	1
mml-miR-330-5p:mml-mir-330	0	1	0	0	1	1	4	3	3	0	2
mml-miR-331-3p:mml-mir-331	150	127	57	119	3	565	353	394	380	139	448
mml-miR-331-5p:mml-mir-331	17	27	13	27	0	73	134	56	16	6	46
mml-miR-335:mml-mir-335	149	74	53	73	8	214	223	186	126	51	185
mml-miR-337-3p:mml-mir-337	17	7	2	8	1	34	13	17	17	6	23
mml-miR-337-5p:mml-mir-337	0	5	0	1	0	7	3	5	4	2	1
mml-miR-338-3p:mml-mir-338	45	78	42	37	0	323	161	352	98	64	277
mml-miR-338-5p:mml-mir-338	3	4	1	5	0	33	11	17	4	5	13
mml-miR-339-3p:mml-mir-339	190	175	90	165	8	418	999	493	159	46	386
mml-miR-339-5p:mml-mir-339	20	22	13	25	3	142	277	187	85	20	106
mml-miR-33a:mml-mir-33a	5	6	1	1	0	8	4	6	3	3	5
mml-miR-33b:mml-mir-33b	1	1	0	0	0	2	2	0	2	1	2
mml-miR-340:mml-mir-340	1635	1096	515	1115	30	2601	3875	3756	3194	418	3280
mml-miR-342-3p:mml-mir-342	378	226	103	262	20	492	390	282	423	185	779
mml-miR-342-5p:mml-mir-342	3	1	0	3	0	1	2	2	1	2	8
mml-miR-345:mml-mir-345	0	0	0	0	0	0	0	0	0	0	0
mml-miR-346:mml-mir-346	0	0	0	0	0	0	0	0	0	0	0
mml-miR-34a:mml-mir-34a	11	14	8	27	3	61	84	69	56	42	189
mml-miR-34b:mml-mir-34b	0	1	0	0	0	2	2	2	2	1	5
mml-miR-34c-3p:mml-mir-34c	0	0	0	0	0	2	3	1	1	0	5
mml-miR-34c-5p:mml-mir-34c	12	5	1	14	0	26	73	18	25	3	205
mml-miR-361-3p:mml-mir-361	233	118	75	123	2	288	356	348	133	42	455
mml-miR-361-5p:mml-mir-361	664	366	193	361	20	903	822	751	573	149	1302
mml-miR-362-3p:mml-mir-362	10	5	1	7	0	10	5	15	9	4	9
mml-miR-362-5p:mml-mir-362	42	22	17	23	0	46	51	38	63	18	65
mml-miR-363:mml-mir-363	17	19	12	7	1	37	125	36	9	2	19
mml-miR-365:mml-mir-365-1	927	730	471	524	18	1341	1378	1696	1233	305	1524
mml-miR-365:mml-mir-365-2	927	730	471	524	18	1341	1378	1696	1233	305	1524
mml-miR-367:mml-mir-367	0	0	0	0	0	0	0	1	1	0	0
mml-miR-369-3p:mml-mir-369	11	11	8	3	0	38	19	18	23	10	36
mml-miR-369-5p:mml-mir-369	13	14	6	13	6	16	29	25	9	8	22
mml-miR-370:mml-mir-370	2	8	3	9	1	13	16	9	2	8	1
mml-miR-371-3p:mml-mir-371-1	0	0	0	0	0	0	0	0	0	0	0
mml-miR-371-3p:mml-mir-371-2	0	0	0	0	0	0	0	0	0	0	0
mml-miR-371-5p:mml-mir-371-1	0	0	0	0	0	0	0	1	0	0	0
mml-miR-371-5p:mml-mir-371-2	0	0	0	0	0	0	0	1	0	0	0
mml-miR-372:mml-mir-372	0	0	0	0	0	2	0	1	1	0	0
mml-miR-373:mml-mir-373	0	0	0	0	0	0	0	0	0	0	0
mml-miR-374a:mml-mir-374a	80	54	51	51	6	223	373	267	173	33	185
mml-miR-374b:mml-mir-374b	48	26	22	41	3	104	216	124	66	31	113
mml-miR-375:mml-mir-375	1	1	1	6	0	9	24	4	24	1	106
mml-miR-376a:mml-mir-376a-1	10	13	2	7	0	6	11	17	16	5	17
mml-miR-376a:mml-mir-376a-2	10	13	2	7	0	6	11	17	16	5	17
mml-miR-376b:mml-mir-376b	1	1	1	0	0	6	1	1	0	6	7
mml-miR-376c:mml-mir-376c	15	16	7	12	0	55	30	32	27	10	52
mml-miR-377:mml-mir-377	3	4	1	5	1	10	4	11	10	5	14
mml-miR-378a:mml-mir-378a	217724	139226	100194	154510	4450	355687	351759	370843	170640	79650	220152
mml-miR-378d:mml-mir-378d	23375	10575	11557	17353	354	32117	30833	31977	17950	5780	29479
mml-miR-378j:mml-mir-378j	15	2	4	8	0	11	14	22	11	3	6
mml-miR-379:mml-mir-379	34	41	12	39	5	71	61	42	63	24	107
mml-miR-380:mml-mir-380	5	10	0	5	3	7	12	8	7	2	5
mml-miR-381:mml-mir-381	881	519	276	613	82	3186	1943	1132	1652	535	4355
mml-miR-382:mml-mir-382	9	6	3	11	3	7	12	11	10	7	21
mml-miR-383:mml-mir-383	0	0	0	10	1	11	36	1	3	1	11
mml-miR-384:mml-mir-384	0	0	0	0	0	0	0	0	0	0	0
mml-miR-3927:mml-mir-3927	0	0	0	0	0	0	0	1	0	0	1
mml-miR-409-3p:mml-mir-409	226	378	117	254	45	396	538	325	239	154	291
mml-miR-409-5p:mml-mir-409	7	14	3	9	0	115	32	42	104	38	43
mml-miR-410:mml-mir-410	166	186	91	119	24	381	402	255	276	148	464
mml-miR-411:mml-mir-411	1767	1621	674	1569	211	3645	3374	2612	2074	825	5082
mml-miR-412:mml-mir-412	0	0	0	0	0	0	0	0	0	0	0
mml-miR-421:mml-mir-421	61	53	23	50	2	125	239	133	54	25	129
mml-miR-422a:mml-mir-422a	0	0	0	0	0	0	0	0	0	0	0
mml-miR-423-3p:mml-mir-423	877	572	363	615	33	1470	2800	1541	246	191	1100
mml-miR-423-5p:mml-mir-423	404	145	162	235	5	574	651	498	105	64	429
mml-miR-424:mml-mir-424	28	25	12	17	0	82	49	68	39	32	99
mml-miR-425:mml-mir-425	116	75	52	95	1	719	1263	625	133	46	342
mml-miR-429:mml-mir-429	0	1	0	0	0	0	2	1	3	0	0
mml-miR-431:mml-mir-431	1	10	3	3	2	16	13	15	8	4	10
mml-miR-432:mml-mir-432	17	16	6	16	2	31	37	18	18	14	47
mml-miR-433:mml-mir-433	1	3	2	5	1	3	5	2	4	2	6
mml-miR-4446:mml-mir-4446	0	0	0	0	0	2	2	1	0	0	2
mml-miR-448:mml-mir-448	0	0	0	0	0	0	0	1	0	0	0
mml-miR-449a:mml-mir-449a	0	0	0	0	0	1	4	0	4	1	2
mml-miR-449b:mml-mir-449b	0	0	0	0	0	0	0	0	1	0	3
mml-miR-450a:mml-mir-450a-1	4	2	0	2	0	17	8	14	8	2	25
mml-miR-450a:mml-mir-450a-2	4	2	0	2	0	17	8	14	8	2	25
mml-miR-450b-3p:mml-mir-450b	0	0	0	0	0	0	0	0	0	0	0
mml-miR-450b-5p:mml-mir-450b	5	6	11	9	0	88	39	27	13	4	75
mml-miR-451:mml-mir-451	421	171	165	241	19	90133	159942	71077	10887	2605	1073
mml-miR-452:mml-mir-452	17	24	5	7	1	36	145	99	33	16	59
mml-miR-453:mml-mir-453	0	0	0	0	0	0	0	0	0	0	0
mml-miR-4536:mml-mir-4536	0	0	0	0	0	0	0	0	0	0	0
mml-miR-454:mml-mir-454	21	19	6	11	0	57	88	52	13	13	37
mml-miR-455-3p:mml-mir-455	7	9	0	7	1	10	6	16	5	5	8
mml-miR-455-5p:mml-mir-455	5	11	4	8	0	30	27	31	14	9	25
mml-miR-4650:mml-mir-4650	0	0	0	0	0	1	0	0	0	0	0
mml-miR-4667:mml-mir-4667	0	0	0	0	0	0	0	0	0	0	0
mml-miR-4716:mml-mir-4716	0	0	0	0	0	0	0	0	0	0	0
mml-miR-4743:mml-mir-4743	0	0	0	0	0	1	0	0	0	0	0
mml-miR-4796:mml-mir-4796	13	4	14	8	1	40	32	36	7	6	46
mml-miR-4803:mml-mir-4803	0	0	0	0	0	0	3	2	7	1	4
mml-miR-484:mml-mir-484	144	117	76	133	18	986	1467	764	178	66	206
mml-miR-485-3p:mml-mir-485	1	0	1	2	1	3	7	3	4	2	3
mml-miR-485-5p:mml-mir-485	8	7	2	7	1	6	4	7	3	4	8
mml-miR-486-3p:mml-mir-486	1278	907	689	1205	27	2389	2738	2003	1008	481	974
mml-miR-486-5p:mml-mir-486	383946	246411	214863	412918	8884	1778624	2101929	1072124	694962	216469	488536
mml-miR-487a:mml-mir-487a	0	0	0	0	0	0	0	0	0	0	0
mml-miR-487b:mml-mir-487b	8	17	7	10	4	36	34	29	15	19	20
mml-miR-488:mml-mir-488	2	1	0	2	0	0	3	2	4	0	4
mml-miR-489:mml-mir-489	98	73	43	63	0	60	70	88	32	23	31
mml-miR-490-3p:mml-mir-490	0	0	0	0	0	0	4	0	1	0	0
mml-miR-490-5p:mml-mir-490	0	0	0	0	0	0	1	0	0	0	0
mml-miR-491-3p:mml-mir-491	4	3	2	0	0	8	7	9	8	0	10
mml-miR-491-5p:mml-mir-491	5	10	5	7	1	26	17	22	18	2	17
mml-miR-492:mml-mir-492	0	0	0	0	0	0	0	0	0	0	0
mml-miR-493:mml-mir-493	5	2	1	3	0	14	16	4	4	1	15
mml-miR-494:mml-mir-494	0	1	1	0	0	0	1	2	1	0	2
mml-miR-495:mml-mir-495	2	3	2	5	0	32	13	12	23	10	44
mml-miR-496:mml-mir-496	0	2	0	0	0	4	2	4	2	3	8
mml-miR-497:mml-mir-497	155	141	45	132	20	245	269	386	152	47	290
mml-miR-498:mml-mir-498	0	0	0	0	0	0	0	0	0	0	0
mml-miR-499-3p:mml-mir-499	12	0	2	6	0	5	4	1	6	0	16
mml-miR-499-5p:mml-mir-499	522	40	185	397	2	484	306	310	166	12	1471
mml-miR-500:mml-mir-500	17	12	9	7	0	22	19	16	16	9	29
mml-miR-501:mml-mir-501	4	2	4	2	0	3	3	2	5	2	3
mml-miR-502-3p:mml-mir-502	247	122	96	185	10	394	340	290	163	84	336
mml-miR-502-5p:mml-mir-502	15	3	2	12	0	19	10	21	20	6	14
mml-miR-503:mml-mir-503	3	1	0	0	0	8	1	2	2	0	13
mml-miR-504:mml-mir-504	6	4	5	1	1	17	23	14	5	1	17
mml-miR-505:mml-mir-505	20	17	5	15	1	70	62	81	48	15	77
mml-miR-506:mml-mir-506	0	0	0	0	0	0	0	0	2	2	26
mml-miR-507:mml-mir-507	0	0	0	0	0	0	0	0	0	0	0
mml-miR-508:mml-mir-508	12	2	1	11	0	28	39	22	40	11	647
mml-miR-509:mml-mir-509-1	0	0	0	0	0	0	0	0	1	0	0
mml-miR-509:mml-mir-509-2	0	0	0	0	0	0	0	0	1	0	0
mml-miR-510:mml-mir-510	0	0	0	0	0	1	2	2	1	0	37
mml-miR-511:mml-mir-511	2	5	3	2	0	5	15	7	7	5	24
mml-miR-512-3p:mml-mir-512	0	0	0	0	0	0	1	0	0	0	0
mml-miR-512-5p:mml-mir-512	0	0	0	0	0	0	0	0	0	0	0
mml-miR-513a:mml-mir-513a-1	0	1	0	0	0	0	2	0	2	0	12
mml-miR-513a:mml-mir-513a-2	0	1	0	0	0	0	2	0	2	0	12
mml-miR-513a:mml-mir-513a-3	0	1	0	0	0	0	2	0	2	0	12
mml-miR-513b:mml-mir-513b-1	0	0	0	0	0	1	1	0	0	1	12
mml-miR-513b:mml-mir-513b-2	0	0	0	0	0	1	1	0	0	1	12
mml-miR-514a:mml-mir-514a	2	0	0	1	0	3	0	0	1	1	34
mml-miR-514b:mml-mir-514b	0	0	0	0	0	0	0	0	0	0	6
mml-miR-516a-3p:mml-mir-516a-1	0	0	0	0	0	0	0	0	0	0	0
mml-miR-516a-3p:mml-mir-516a-2	0	0	0	0	0	0	0	0	0	0	0
mml-miR-516a-5p:mml-mir-516a-1	0	0	0	0	0	0	0	0	0	0	2
mml-miR-516a-5p:mml-mir-516a-2	0	0	0	0	0	0	0	0	0	0	2
mml-miR-516b:mml-mir-516b	0	0	0	0	0	0	0	0	0	0	0
mml-miR-517a:mml-mir-517a	0	0	0	0	0	0	0	0	0	0	0
mml-miR-517c:mml-mir-517c	0	0	0	0	0	0	0	0	0	0	0
mml-miR-518a-3p:mml-mir-518a	0	0	0	0	0	0	0	0	0	0	0
mml-miR-518a-5p:mml-mir-518a	0	0	0	0	0	1	0	0	0	0	0
mml-miR-518b:mml-mir-518b	0	0	0	0	0	0	0	0	0	0	0
mml-miR-518c:mml-mir-518c	0	0	0	0	0	0	0	0	0	0	0
mml-miR-518d:mml-mir-518d	0	0	0	0	0	0	0	0	0	0	0
mml-miR-518e:mml-mir-518e	0	0	0	0	0	0	0	0	0	0	0
mml-miR-518f:mml-mir-518f	0	0	0	0	0	0	0	0	0	0	0
mml-miR-519a:mml-mir-519a	0	0	0	0	0	0	0	0	0	0	0
mml-miR-519b:mml-mir-519b	0	0	0	0	0	0	0	0	0	0	0
mml-miR-519c:mml-mir-519c	0	0	0	0	0	0	1	0	0	0	0
mml-miR-519d:mml-mir-519d	0	0	0	0	0	0	0	0	0	0	0
mml-miR-519e:mml-mir-519e	0	0	0	0	0	0	0	0	0	0	0
mml-miR-520a:mml-mir-520a	0	0	0	0	0	0	0	0	0	0	0
mml-miR-520g:mml-mir-520g	0	0	0	0	0	0	0	0	0	0	0
mml-miR-521:mml-mir-521	0	0	0	0	0	0	0	0	0	0	0
mml-miR-523a:mml-mir-523a	0	0	0	0	0	0	0	0	0	0	0
mml-miR-523b:mml-mir-523b	0	0	0	0	0	0	0	0	0	0	0
mml-miR-524:mml-mir-524	0	0	0	0	0	0	0	0	0	0	0
mml-miR-525:mml-mir-525	0	0	0	0	0	0	2	0	0	0	2
mml-miR-526b:mml-mir-526b	0	0	0	0	0	0	0	0	0	0	0
mml-miR-532-3p:mml-mir-532	22	19	8	18	2	34	41	21	27	11	43
mml-miR-532-5p:mml-mir-532	606	430	266	643	38	802	1075	870	614	229	1045
mml-miR-539:mml-mir-539	0	0	3	0	0	1	1	1	0	0	1
mml-miR-541:mml-mir-541	3	4	1	2	0	5	5	4	0	1	3
mml-miR-542-3p:mml-mir-542	6	3	2	4	0	30	10	14	4	2	23
mml-miR-542-5p:mml-mir-542	0	2	0	0	0	3	4	0	1	0	3
mml-miR-543:mml-mir-543	2	1	2	2	1	6	9	5	7	1	9
mml-miR-544:mml-mir-544	1	0	0	1	0	0	0	0	0	0	0
mml-miR-545:mml-mir-545	0	0	0	0	0	0	0	0	0	0	0
mml-miR-548a:mml-mir-548a	0	0	0	0	0	0	0	0	0	0	0
mml-miR-548b:mml-mir-548b	0	0	0	0	0	0	0	0	0	0	0
mml-miR-548c:mml-mir-548c	0	0	0	0	0	0	0	1	0	0	0
mml-miR-548d-3p:mml-mir-548d	0	0	0	2	0	3	5	0	2	0	9
mml-miR-548d-5p:mml-mir-548d	0	0	0	2	0	0	5	0	2	0	7
mml-miR-548e:mml-mir-548e	1	1	0	0	0	2	2	3	2	0	7
mml-miR-548f:mml-mir-548f	0	0	0	0	0	0	0	0	0	0	0
mml-miR-549:mml-mir-549	0	0	0	0	0	0	0	0	0	0	0
mml-miR-550:mml-mir-550	1	3	1	3	0	11	13	5	0	1	8
mml-miR-551a:mml-mir-551a	3	2	0	0	0	0	0	0	1	0	0
mml-miR-551b:mml-mir-551b	0	0	0	0	0	3	5	3	5	3	3
mml-miR-552:mml-mir-552	0	0	0	0	0	0	0	0	0	0	0
mml-miR-553:mml-mir-553	0	0	0	0	0	0	0	0	0	0	0
mml-miR-554:mml-mir-554	0	0	0	0	0	0	0	0	0	0	0
mml-miR-556-3p:mml-mir-556	0	0	0	0	0	0	0	0	0	0	0
mml-miR-556-5p:mml-mir-556	0	0	0	0	0	0	0	0	0	0	0
mml-miR-557:mml-mir-557	0	0	0	0	0	0	0	0	0	0	0
mml-miR-558:mml-mir-558	0	0	0	0	0	0	0	0	0	0	0
mml-miR-562:mml-mir-562	0	0	0	0	0	0	0	0	0	0	0
mml-miR-563:mml-mir-563	0	0	0	0	0	0	0	0	0	0	0
mml-miR-567:mml-mir-567	0	0	0	0	0	0	0	0	0	0	0
mml-miR-568:mml-mir-568	0	0	0	0	0	0	0	0	0	0	0
mml-miR-569:mml-mir-569	0	0	0	0	0	0	0	0	0	0	0
mml-miR-570:mml-mir-570	0	0	0	0	0	0	0	0	0	0	0
mml-miR-571:mml-mir-571	0	0	0	0	0	0	0	0	0	0	0
mml-miR-572:mml-mir-572	0	0	0	0	0	0	0	0	0	0	0
mml-miR-573:mml-mir-573	0	0	0	0	0	0	0	0	0	0	0
mml-miR-576-3p:mml-mir-576	0	0	0	0	0	0	0	0	0	0	0
mml-miR-576-5p:mml-mir-576	1	1	0	0	0	3	10	7	3	1	15
mml-miR-577:mml-mir-577	41	6	7	12	0	29	14	29	50	12	60
mml-miR-578:mml-mir-578	0	0	0	0	0	0	1	0	0	0	1
mml-miR-579:mml-mir-579	0	0	0	0	0	0	0	0	0	0	0
mml-miR-580:mml-mir-580	0	0	0	0	0	1	3	0	0	0	1
mml-miR-581:mml-mir-581	0	0	0	0	0	0	0	0	0	0	0
mml-miR-582-3p:mml-mir-582	7	11	3	7	5	33	30	33	7	3	15
mml-miR-582-5p:mml-mir-582	4	8	3	2	0	13	17	15	8	3	8
mml-miR-583:mml-mir-583	0	0	0	0	0	0	0	0	0	0	0
mml-miR-584:mml-mir-584	19	7	4	16	2	137	606	157	22	27	19
mml-miR-586:mml-mir-586	0	0	0	0	0	0	0	0	0	0	0
mml-miR-587:mml-mir-587	0	0	0	0	0	0	0	0	0	0	0
mml-miR-589:mml-mir-589	0	0	0	0	0	0	2	0	0	0	8
mml-miR-590-3p:mml-mir-590	66	32	26	61	1	96	289	154	81	22	163
mml-miR-590-5p:mml-mir-590	1	0	0	0	0	1	1	0	0	2	0
mml-miR-592:mml-mir-592	0	1	1	0	0	5	3	1	6	1	17
mml-miR-593:mml-mir-593	0	0	0	0	0	0	0	0	0	0	0
mml-miR-595:mml-mir-595	0	0	0	0	0	0	0	0	0	0	0
mml-miR-597:mml-mir-597	0	0	0	0	0	0	0	0	0	0	0
mml-miR-598:mml-mir-598	23	57	19	18	1	52	81	64	16	3	116
mml-miR-599:mml-mir-599	0	0	0	1	0	0	1	1	1	0	1
mml-miR-600:mml-mir-600	0	0	0	0	0	0	0	0	0	0	0
mml-miR-601:mml-mir-601	0	0	0	0	0	0	0	0	0	0	0
mml-miR-603:mml-mir-603	0	0	0	0	0	0	0	0	0	0	0
mml-miR-604:mml-mir-604	0	0	0	0	0	0	0	0	0	0	0
mml-miR-605:mml-mir-605	8	4	0	3	0	20	15	6	15	2	22
mml-miR-607:mml-mir-607	0	0	0	0	0	0	0	0	0	0	0
mml-miR-609:mml-mir-609	0	0	0	0	0	0	0	0	0	0	0
mml-miR-611:mml-mir-611	0	0	0	0	0	0	0	0	0	0	0
mml-miR-612:mml-mir-612	0	0	0	0	0	0	0	0	0	0	0
mml-miR-6127:mml-mir-6127	0	0	0	0	0	0	0	0	0	0	0
mml-miR-6128:mml-mir-6128	0	0	0	0	0	3	3	3	2	0	0
mml-miR-6129:mml-mir-6129	0	0	0	0	0	0	0	0	0	0	0
mml-miR-6130:mml-mir-6130	0	0	0	0	0	0	0	0	0	0	0
mml-miR-6131:mml-mir-6131	0	0	0	0	0	0	0	0	0	0	0
mml-miR-6132:mml-mir-6132	0	0	0	0	0	0	0	0	0	0	0
mml-miR-6133:mml-mir-6133	0	0	0	0	0	0	0	0	0	0	0
mml-miR-6134:mml-mir-6134	8	16	5	5	1	7	17	9	2	3	9
mml-miR-615-3p:mml-mir-615	28	21	10	18	1	78	39	52	23	17	46
mml-miR-615-5p:mml-mir-615	0	1	0	0	0	1	1	0	0	0	0
mml-miR-616:mml-mir-616	0	0	0	0	0	0	0	0	0	0	0
mml-miR-618:mml-mir-618	0	0	0	0	0	0	0	0	0	0	0
mml-miR-619:mml-mir-619	0	0	0	0	0	0	0	0	0	0	0
mml-miR-622:mml-mir-622	0	0	0	0	0	0	0	0	0	0	0
mml-miR-624:mml-mir-624	5	1	1	1	0	10	4	3	5	2	7
mml-miR-625:mml-mir-625	0	0	0	0	0	0	0	0	0	0	0
mml-miR-626:mml-mir-626	0	0	0	0	0	0	0	0	0	0	0
mml-miR-627:mml-mir-627	0	0	0	0	0	1	0	2	0	0	0
mml-miR-628-3p:mml-mir-628	120	89	45	74	3	105	129	106	62	18	173
mml-miR-628-5p:mml-mir-628	118	81	70	96	4	161	235	220	92	38	304
mml-miR-631:mml-mir-631	0	0	0	0	0	0	0	0	0	0	0
mml-miR-632:mml-mir-632	0	0	0	0	0	0	0	0	0	0	0
mml-miR-633:mml-mir-633	0	0	0	0	0	0	0	0	0	0	0
mml-miR-636:mml-mir-636	0	0	0	0	0	1	2	2	0	0	1
mml-miR-638:mml-mir-638	0	0	0	0	0	0	0	0	0	0	0
mml-miR-639:mml-mir-639	0	0	0	0	0	0	0	0	0	0	0
mml-miR-640:mml-mir-640	0	0	1	0	0	0	0	0	0	0	0
mml-miR-642:mml-mir-642	0	0	0	0	0	0	0	0	0	0	0
mml-miR-643:mml-mir-643	0	0	0	0	0	0	0	0	0	0	0
mml-miR-644:mml-mir-644	0	0	0	0	0	0	0	0	0	0	0
mml-miR-648:mml-mir-648	0	0	0	0	0	0	0	0	0	0	0
mml-miR-649:mml-mir-649	0	0	0	0	0	0	0	0	0	0	0
mml-miR-650a:mml-mir-650a-1	0	0	0	0	0	0	0	0	0	0	0
mml-miR-650a:mml-mir-650a-2	0	0	0	0	0	0	0	0	0	0	0
mml-miR-650b:mml-mir-650b	0	0	0	0	0	0	0	0	0	0	0
mml-miR-650c:mml-mir-650c	0	0	0	0	0	0	0	0	0	0	0
mml-miR-650d:mml-mir-650d	0	0	0	0	0	0	0	0	0	0	0
mml-miR-651:mml-mir-651	0	0	0	0	0	0	0	0	0	0	0
mml-miR-652:mml-mir-652	47	41	16	45	2	140	244	165	49	20	99
mml-miR-653:mml-mir-653	76	66	51	61	1	72	77	106	53	24	43
mml-miR-654-3p:mml-mir-654	372	454	133	266	48	692	758	538	588	229	528
mml-miR-654-5p:mml-mir-654	6	8	1	9	1	8	11	6	4	4	6
mml-miR-656:mml-mir-656	8	4	3	4	1	13	7	8	8	5	15
mml-miR-657:mml-mir-657	0	0	0	0	0	0	0	0	0	0	0
mml-miR-660:mml-mir-660	355	231	124	265	20	456	538	488	445	165	489
mml-miR-661:mml-mir-661	0	0	0	0	0	0	0	0	0	0	0
mml-miR-662:mml-mir-662	0	0	0	0	0	0	0	0	0	0	0
mml-miR-663:mml-mir-663-1	0	0	0	0	0	0	1	0	0	0	0
mml-miR-663:mml-mir-663-10	0	0	0	0	0	0	1	0	0	0	0
mml-miR-663:mml-mir-663-11	0	0	0	0	0	0	1	0	0	0	0
mml-miR-663:mml-mir-663-2	0	0	0	0	0	0	1	0	0	0	0
mml-miR-663:mml-mir-663-3	0	0	0	0	0	0	1	0	0	0	0
mml-miR-663:mml-mir-663-4	0	0	0	0	0	0	1	0	0	0	0
mml-miR-663:mml-mir-663-5	0	0	0	0	0	0	1	0	0	0	0
mml-miR-663:mml-mir-663-6	0	0	0	0	0	0	1	0	0	0	0
mml-miR-663:mml-mir-663-7	0	0	0	0	0	0	1	0	0	0	0
mml-miR-663:mml-mir-663-8	0	0	0	0	0	0	1	0	0	0	0
mml-miR-663:mml-mir-663-9	0	0	0	0	0	0	1	0	0	0	0
mml-miR-664:mml-mir-664	20	7	4	13	0	31	21	21	19	9	21
mml-miR-665:mml-mir-665	1	2	2	1	0	3	4	0	4	0	1
mml-miR-668:mml-mir-668	0	0	0	1	1	2	2	2	0	1	0
mml-miR-670:mml-mir-670	0	0	0	0	0	0	0	0	0	0	0
mml-miR-671-3p:mml-mir-671	34	48	38	66	2	69	167	57	21	17	122
mml-miR-671-5p:mml-mir-671	4	4	2	7	0	7	8	2	11	0	14
mml-miR-675:mml-mir-675	0	0	0	0	0	0	4	0	3	1	3
mml-miR-676:mml-mir-676	49	62	25	48	9	95	112	102	48	32	73
mml-miR-7:mml-mir-7-1	62	42	40	42	0	197	330	198	67	23	91
mml-miR-7:mml-mir-7-2	62	42	40	42	0	197	330	198	67	23	91
mml-miR-7:mml-mir-7-3	62	42	40	42	0	197	330	198	67	23	91
mml-miR-708:mml-mir-708	57	83	50	87	6	99	197	189	217	93	207
mml-miR-711:mml-mir-711	0	0	0	0	0	0	0	0	0	0	0
mml-miR-758:mml-mir-758	5	5	0	5	0	8	5	5	3	4	4
mml-miR-759:mml-mir-759	0	0	0	0	0	0	0	0	0	0	0
mml-miR-760:mml-mir-760	6	2	0	1	0	5	6	3	2	2	9
mml-miR-761:mml-mir-761	0	0	0	0	0	0	0	0	0	0	0
mml-miR-762:mml-mir-762-1	0	0	0	0	0	0	0	0	0	0	0
mml-miR-762:mml-mir-762-2	0	0	0	0	0	0	0	0	0	0	0
mml-miR-762:mml-mir-762-3	0	0	0	0	0	0	0	0	0	0	0
mml-miR-764:mml-mir-764	0	0	0	0	0	0	0	0	0	0	0
mml-miR-765:mml-mir-765	0	0	0	0	0	0	0	0	0	0	0
mml-miR-767-3p:mml-mir-767	0	0	0	0	0	0	0	0	0	0	0
mml-miR-767-5p:mml-mir-767	0	0	0	0	0	1	0	0	0	0	3
mml-miR-770-5p:mml-mir-770	0	0	0	0	0	0	0	0	0	0	2
mml-miR-802:mml-mir-802	0	0	0	0	0	0	0	0	0	0	0
mml-miR-873:mml-mir-873	0	0	0	0	0	0	0	0	1	0	0
mml-miR-874:mml-mir-874	39	50	27	45	2	115	89	95	105	51	196
mml-miR-875-3p:mml-mir-875	1	0	1	0	0	0	0	0	0	0	0
mml-miR-875-5p:mml-mir-875	0	0	0	0	0	1	0	0	0	0	1
mml-miR-876-3p:mml-mir-876	0	0	0	0	0	0	0	0	0	0	0
mml-miR-876-5p:mml-mir-876	0	0	0	0	0	0	0	0	0	0	0
mml-miR-877:mml-mir-877	5	3	4	2	0	10	6	1	2	3	10
mml-miR-885-3p:mml-mir-885	9	5	6	1	0	17	10	10	3	3	3
mml-miR-885-5p:mml-mir-885	565	433	238	299	10	1339	1466	1353	748	353	1131
mml-miR-887:mml-mir-887	9	16	5	18	0	14	34	24	19	9	23
mml-miR-888:mml-mir-888	0	0	0	0	0	0	0	0	0	0	0
mml-miR-889:mml-mir-889	86	124	52	108	14	129	154	135	123	69	118
mml-miR-890:mml-mir-890	0	0	0	0	0	0	0	0	0	0	0
mml-miR-891a:mml-mir-891a	0	0	0	0	0	0	0	0	0	0	0
mml-miR-891b:mml-mir-891b	0	0	0	0	0	0	0	0	0	0	0
mml-miR-892a:mml-mir-892a	0	0	0	0	0	0	0	0	0	0	0
mml-miR-892b:mml-mir-892b	0	0	0	0	0	0	0	0	0	0	0
mml-miR-9:mml-mir-9-1	9	34	5	4	1	39	95	26	53	20	252
mml-miR-9:mml-mir-9-2	9	34	5	4	1	39	95	26	53	20	252
mml-miR-9:mml-mir-9-3	9	34	5	4	1	39	95	26	53	20	252
mml-miR-920:mml-mir-920	0	0	0	0	0	0	0	0	0	0	0
mml-miR-922:mml-mir-922	0	0	0	0	0	0	0	0	0	0	0
mml-miR-924:mml-mir-924	0	0	0	0	0	0	0	0	0	0	0
mml-miR-92a:mml-mir-92a-1	8407	5765	3572	6039	359	41104	69923	34186	6906	3585	16977
mml-miR-92a:mml-mir-92a-2	8048	5506	3390	5773	343	39560	67310	33026	6751	3493	16390
mml-miR-92b:mml-mir-92b	90	127	62	136	82	352	785	380	79	229	333
mml-miR-93:mml-mir-93	445	328	236	394	19	4933	8633	4444	986	580	1381
mml-miR-933:mml-mir-933	0	0	0	0	0	1	0	0	1	0	0
mml-miR-934:mml-mir-934	0	0	0	0	0	0	0	0	0	0	0
mml-miR-936:mml-mir-936	0	0	0	0	0	0	0	0	0	0	0
mml-miR-937:mml-mir-937	0	0	0	0	0	1	0	2	0	0	0
mml-miR-938:mml-mir-938	0	0	0	0	0	0	0	0	0	0	0
mml-miR-939:mml-mir-939	2	2	3	0	0	1	0	1	0	0	0
mml-miR-940:mml-mir-940	0	0	0	1	0	4	2	3	1	0	0
mml-miR-942:mml-mir-942	0	1	1	1	0	48	144	70	5	0	12
mml-miR-944:mml-mir-944	3	2	0	1	0	1	4	3	7	1	10
mml-miR-95:mml-mir-95	236	126	139	134	3	570	386	631	430	140	973
mml-miR-96:mml-mir-96	2	0	1	13	0	5	4	2	8	4	33
mml-miR-98:mml-mir-98	2209	2189	706	1490	59	2919	4107	2363	1712	1476	3499
mml-miR-99a:mml-mir-99a	3253	2261	1153	2755	187	7496	4252	6267	5975	2211	6215
mml-miR-99b:mml-mir-99b	3893	4423	1517	5232	479	11841	7673	9126	19533	6894	12757
