# Supplementary material for: Age-associated miRNA Alterations in Skeletal Muscle from Rhesus Monkeys reversed by caloric restriction
Source: Aging (Albany NY). 2013 Sep 9;5(9):692–703. doi: 10.18632/aging.100598 (PMC3808701; doi:10.18632/aging.100598)
Supplement: Supplementary file 2 [file aging-05-692-s002.xlsx]

## Sheet: Sheet1
precursor coordinate	miRDeep2 score	consensus mature sequence	consensus star sequence	consensus precursor sequence	estimated probability	total read count	mature read count	loop read count	star read count	significant randfold p-value	example miRBase miRNA with the same seed
chr1:205580546..205580606:-	5.9	uauggaggucucugucuggc	ucugaucguuccccuccauaca	uauggaggucucugucuggcuuaggacagcuggcuaagucugaucguuccccuccauaca	94 +/- 6%	17	8	0	9	no	hsa-miR-4802-5p:MIMAT0019981
chr3:4407402..4407459:-	5.8	cucagcagugguggguuggacc	ucuuacccuuuccugcuggc	cucagcagugguggguuggaccgugguguugaccuggucuuacccuuuccugcuggc	94 +/- 6%	2	1	0	1	yes	hsa-miR-4291:MIMAT0016922
chr4:2595467..2595524:-	5.7	caaaaacugcaauuuccuuugc	aaagguaacugcaguuuuugca	aaagguaacugcaguuuuugcauuacuuuuaauggcaaaaacugcaauuuccuuugc	94 +/- 6%	2	1	0	1	yes	hsa-miR-548x-3p:MIMAT0015081
chr7:155409882..155409944:+	5.5	cccugggccaccucgcuugcc	acagggcgagguucagacccaggcugug	acagggcgagguucagacccaggcugugaacagcccaagcacccugggccaccucgcuugcc	94 +/- 6%	2	1	0	1	yes	hsa-miR-939-3p:MIMAT0022939
chr10:84006376..84006433:+	5.4	acgauaacacccaaguccgaa	uuggacuuuggugcuacca	uuggacuuuggugcuaccauaaaggaauauauacuuacgauaacacccaaguccgaa	94 +/- 6%	10	9	0	1	yes	-
chr13:26638811..26638859:-	5.3	acugggcuuggagucagaagac	cuucccacucugacucugaugc	acugggcuuggagucagaagacccagcuucccacucugacucugaugc	94 +/- 6%	31	31	0	0	yes	hsa-miR-378g:MIMAT0018937
chr2:139320937..139320994:-	5.3	caaaaaccgcaguuacuuu	aguaauugugguuuuugcc	aguaauugugguuuuugccuuuaaaaaaaaaaaaaagucaaaaaccgcaguuacuuu	94 +/- 6%	15	14	1	0	yes	hsa-miR-548d-3p:MIMAT0003323
chr13:62933910..62933968:+	5.2	aaaaaccguaguuacuuuugc	aaaaguaauugcgguuuuagcc	aaaaguaauugcgguuuuagccauuaaaaggaaugggaaaaaccguaguuacuuuugc	94 +/- 6%	8	7	0	1	yes	-
chr18:51716515..51716573:-	5.2	uuuagugugauaauggcguu	caccauugucacacuccaca	uuuagugugauaauggcguuugauaguuuagacacaaacaccauugucacacuccaca	94 +/- 6%	29	29	0	0	yes	hsa-miR-3591-5p:MIMAT0019876
chr15:1147236..1147297:-	5.1	ugcugucccuccagagccguggc	caggcucuugugaggacagugc	ugcugucccuccagagccguggcugacagccaggucuggcaggcucuugugaggacagugc	94 +/- 6%	8	7	0	1	yes	-
chr9:103084714..103084773:-	5.1	ucgaccggaccucgaccggc	cucggcguggcgucggucg	ucgaccggaccucgaccggcucgucuguguugccaaucgacucggcguggcgucggucg	94 +/- 6%	880	813	0	67	yes	hsa-miR-1307-5p:MIMAT0022727
chr14:70119266..70119324:-	8.1	aaaaguaauugcaguuguugc	caaaaacugcaguuacuugugc	aaaaguaauugcaguuguugcuguugaaaguaauggcaaaaacugcaguuacuugugc	91 +/- 10%	7	3	0	4	yes	hsa-miR-559:MIMAT0003223
chr3:81456399..81456454:-	7.1	uuggccaggcuggucuugaacucc	uguucugccggccuuggucuc	uuggccaggcuggucuugaacuccugaccucaaguguucugccggccuuggucuc	91 +/- 10%	7	4	0	3	yes	hsa-miR-4435:MIMAT0018951
chr10:64151927..64151988:+	9.2	ccaccuccccugcaaacgucca	acguuggcucugguggugaug	ccaccuccccugcaaacguccaguggugcagagguaauggacguuggcucugguggugaug	90 +/- 11%	18	14	0	4	no	hsa-miR-1306-5p:MIMAT0022726
chr3:21758856..21758906:-	4.6	caaaaaccgcaguuacuuu	aguaaugcaguuuugcc	aguaaugcaguuuugccauuacuuuuaaugucaaaaaccgcaguuacuuu	89 +/- 7%	14	14	0	0	yes	hsa-miR-548d-3p:MIMAT0003323
chr12:41976864..41976919:+	4.6	ucugugcagaacucauagaag	uucugugaguccuaugcagaac	uucugugaguccuaugcagaacucauaggggugcucugugcagaacucauagaag	89 +/- 7%	7	6	0	1	yes	-
chrX:62639455..62639519:-	4.5	cuccguuugccuguuuugcuga	agcaaaauaagcaaauggaaaa	cuccguuugccuguuuugcugauguacauucaacucauucucagcaaaauaagcaaauggaaaa	89 +/- 7%	14	14	0	0	yes	hsa-miR-1468:MIMAT0006789
chr9:125976487..125976543:-	4.3	uugggugacauuuguagaug	uuuacacgugucgcucggga	uugggugacauuuguagaugucucuguaucuugacauuuacacgugucgcucggga	89 +/- 7%	10	10	0	0	yes	hsa-miR-1262:MIMAT0005914
chr18:6923491..6923553:+	174.8	aggagugacagaguuagacuc	agucucgcucugucagucagg	aggagugacagaguuagacucuuuuuuuuuuuuugagacagagucucgcucugucagucagg	89 +/- 13%	340	339	0	1	yes	-
chr6:85254273..85254330:+	83.2	aaaaggaauugcgguuuuugaca	caaaaaccgcaguuacuuuugc	aaaaggaauugcgguuuuugacauuacuuuaaagucaaaaaccgcaguuacuuuugc	89 +/- 13%	161	147	0	14	yes	-
chr16:11829814..11829892:+	63.9	ugcggggcuagggcuaacagc	cuguugccacuaaccucaacc	ugcggggcuagggcuaacagcagucuuacugaagguuuccuggaaaccacgcacaugcuguugccacuaaccucaacc	89 +/- 13%	117	115	0	2	yes	hsa-miR-744-5p:MIMAT0004945
chr3:189815411..189815469:+	61.2	aaaaguaauugugguuuuugc	caaaacccgcaguuacuuuugc	aaaaguaauugugguuuuugcaauuaugcuuaguggcaaaacccgcaguuacuuuugc	89 +/- 13%	118	117	0	1	yes	-
chr1:212022328..212022385:-	23.5	uggccucuggguguguaccc	aguguacuuccugaggccuc	aguguacuuccugaggccucuggguauaaaauuccuguggccucuggguguguaccc	89 +/- 13%	37	30	0	7	yes	hsa-miR-4757-5p:MIMAT0019901
chr10:84714589..84714645:-	12	acagcaaucgcucuuuuggaag	ucugaaagagcaguugguguu	ucugaaagagcaguugguguuuauuuuuuacuaaacagcaaucgcucuuuuggaag	89 +/- 13%	22	14	0	8	yes	-
chr20:87818411..87818469:+	11.1	gguguggcugugugcugaggguc	ucucaggaugccgcugcacg	gguguggcugugugcugagggucuguggucccugcgacucucaggaugccgcugcacg	89 +/- 13%	12	7	0	5	yes	hsa-miR-644a:MIMAT0003314
chr14:109970184..109970240:-	10.6	uggcaguggaguuagugauug	aaucagcuaaugacacugcc	uggcaguggaguuagugauuguaaccaccacaguacaaucagcuaaugacacugcc	89 +/- 13%	12	11	0	1	yes	hsa-miR-34a-5p:MIMAT0000255
chr13:62933909..62933968:+	5.7	aaaaaccguaguuacuuuugc	caaaaguaauugcgguuuu	caaaaguaauugcgguuuuagccauuaaaaggaaugggaaaaaccguaguuacuuuugc	87 +/- 12%	9	5	0	4	yes	-
chr13:26638811..26638859:-	5.3	acugggcuuggagucagaagac	cuucccacucugacucugaugc	acugggcuuggagucagaagacccagcuucccacucugacucugaugc	87 +/- 12%	21	21	0	0	yes	hsa-miR-378g:MIMAT0018937
chr10:64151927..64151987:+	5.2	ccaccuccccugcaaacgucca	acguuggcucugguggugau	ccaccuccccugcaaacguccaguggugcagagguaauggacguuggcucugguggugau	87 +/- 12%	10	9	0	1	no	hsa-miR-1306-5p:MIMAT0022726
chr9:103084714..103084773:-	5.1	ucgaccggaccucgaccggc	cucggcguggcgucggucg	ucgaccggaccucgaccggcucgucuguguugccaaucgacucggcguggcgucggucg	87 +/- 12%	486	457	0	29	yes	hsa-miR-1307-5p:MIMAT0022727
chr20:87818411..87818471:+	7.1	gguguggcugugugcugaggguc	ucucaggaugccgcugcacgug	gguguggcugugugcugagggucuguggucccugcgacucucaggaugccgcugcacgug	84 +/- 16%	4	2	0	2	yes	hsa-miR-644a:MIMAT0003314
chr10:64151927..64151989:+	6.2	ccaccuccccugcaaacgucca	acguuggcucugguggugaugg	ccaccuccccugcaaacguccaguggugcagagguaauggacguuggcucugguggugaugg	83 +/- 15%	12	9	0	3	no	hsa-miR-1306-5p:MIMAT0022726
chr10:29091320..29091387:+	5.6	ugcagacucuuggauuccaccc	uggaguccaggaaucugcauuu	ugcagacucuuggauuccacccccagagaauccguaaaccggggguggaguccaggaaucugcauuu	83 +/- 13%	9	8	0	1	yes	-
chr13:26638811..26638859:-	5.3	acugggcuuggagucagaagac	cuucccacucugacucugaugc	acugggcuuggagucagaagacccagcuucccacucugacucugaugc	83 +/- 13%	24	24	0	0	yes	hsa-miR-378g:MIMAT0018937
chr2:40118462..40118523:-	109.4	gagagaucagaggcgcagag	ccugugccuuuuaccucuuuaa	gagagaucagaggcgcagagugcgucaaugucaaugaagccugugccuuuuaccucuuuaa	82 +/- 18%	215	213	0	2	yes	-
chr18:6923491..6923554:+	73.3	aggagugacagaguuagacuc	agucucgcucugucagucaggc	aggagugacagaguuagacucuuuuuuuuuuuuugagacagagucucgcucugucagucaggc	82 +/- 18%	141	138	1	2	yes	-
chr16:11829814..11829892:+	46	ugcggggcuagggcuaacagc	cuguugccacuaaccucaacc	ugcggggcuagggcuaacagcagucuuacugaagguuuccuggaaaccacgcacaugcuguugccacuaaccucaacc	82 +/- 18%	82	80	0	2	yes	hsa-miR-744-5p:MIMAT0004945
chr3:189815411..189815469:+	44.9	aaaaguaauugugguuuuugc	caaaacccgcaguuacuuuugc	aaaaguaauugugguuuuugcaauuaugcuuaguggcaaaacccgcaguuacuuuugc	82 +/- 18%	86	74	0	12	yes	-
chr1:212022327..212022385:-	21.4	uguggccucuggguguguacccu	aguguacuuccugaggccucug	aguguacuuccugaggccucuggguauaaaauuccuguggccucuggguguguacccu	82 +/- 18%	40	38	0	2	yes	-
chr10:84714589..84714645:-	17.6	ucugaaagagcaguugguguu	acagcaaucgcucuuuuggaag	ucugaaagagcaguugguguuuauuuuuuacuaaacagcaaucgcucuuuuggaag	82 +/- 18%	26	21	0	5	yes	hsa-miR-4766-5p:MIMAT0019917
chr19:59640352..59640412:+	16.4	cgucaauuacguuugcacuga	uggugcaaaaguaauuggggu	uggugcaaaaguaauugggguuuuugccauuaccuuuaacgucaauuacguuugcacuga	82 +/- 18%	32	29	0	3	yes	-
chr10:64151927..64151989:+	5.2	ccaccuccccugcaaacgucc	acguuggcucugguggugaugg	ccaccuccccugcaaacguccaguggugcagagguaauggacguuggcucugguggugaugg	82 +/- 18%	10	9	0	1	no	hsa-miR-1306-5p:MIMAT0022726
chr16:11829814..11829892:+	5.1	ugcggggcuagggcuaacagc	uguugccacuaaccucaacc	ugcggggcuagggcuaacagcagucuuacugaagguuuccuggaaaccacgcacaugcuguugccacuaaccucaacc	82 +/- 18%	49	49	0	0	yes	hsa-miR-744-5p:MIMAT0004945
chr20:87818413..87818469:+	8.5	ucucaggaugccgcugcacg	uguggcugugugcugaggg	uguggcugugugcugagggucuguggucccugcgacucucaggaugccgcugcacg	81 +/- 21%	7	6	0	1	yes	hsa-miR-3664-3p:MIMAT0019220
chr10:84714589..84714645:-	7.9	acagcaaucgcucuuuuggaag	ucugaaagagcaguugguguu	ucugaaagagcaguugguguuuauuuuuuacuaaacagcaaucgcucuuuuggaag	81 +/- 16%	14	9	0	5	yes	-
chr12:91014001..91014057:-	7.6	aaaaguaauuguggucuuugc	caaaaaccacaauuacuuu	aaaaguaauuguggucuuugccguugcuuuuaaaaggcaaaaaccacaauuacuuu	81 +/- 16%	6	4	0	2	yes	hsa-miR-559:MIMAT0003223
chr17:28813574..28813632:-	4.4	uguuguacuuuuuuuuuugu	acaaaaaaaaaagcccaaccc	uguuguacuuuuuuuuuuguucguugcauuuuuaggaacaaaaaaaaaagcccaaccc	78 +/- 12%	18	17	0	1	yes	hsa-miR-3613-5p:MIMAT0017990
chr20:56916252..56916315:-	4.1	aagcacugccuuugaaccuga	acgggccaagcaacagugcuag	aagcacugccuuugaaccugaugugucuuguuuguagcuucacgggccaagcaacagugcuag	78 +/- 12%	22	21	0	1	no	-
chr11:76906354..76906413:-	9.9	ugugugugugugugugagug	uugagacagcgugauagacu	ugugugugugugugugagugugauguauauauguguguuuugagacagcgugauagacu	77 +/- 26%	40	39	0	1	no	-
chr18:6923491..6923554:+	144.7	aggagugacagaguuagacuc	agucucgcucugucagucaggc	aggagugacagaguuagacucuuuuuuuuuuuuugagacagagucucgcucugucagucaggc	77 +/- 19%	281	279	1	1	yes	-
chr2:40118462..40118523:-	125.3	gagagaucagaggcgcagag	ccugugccuuuuaccucuuuaa	gagagaucagaggcgcagagugcgucaaugucaaugaagccugugccuuuuaccucuuuaa	77 +/- 19%	246	242	0	4	yes	-
chr16:11829814..11829892:+	50.7	ugcggggcuagggcuaacagc	cuguugccacuaaccucaacc	ugcggggcuagggcuaacagcagucuuacugaagguuuccuggaaaccacgcacaugcuguugccacuaaccucaacc	77 +/- 19%	91	87	0	4	yes	hsa-miR-744-5p:MIMAT0004945
chr1:212022327..212022385:-	15.8	uguggccucuggguguguacccu	aguguacuuccugaggccucug	aguguacuuccugaggccucuggguauaaaauuccuguggccucuggguguguacccu	77 +/- 19%	29	28	0	1	yes	-
chr20:87818413..87818469:+	11.7	ucucaggaugccgcugcacg	uguggcugugugcugaggguc	uguggcugugugcugagggucuguggucccugcgacucucaggaugccgcugcacg	77 +/- 19%	13	10	0	3	yes	hsa-miR-3664-3p:MIMAT0019220
chr17:28813574..28813632:-	11.2	uguuguacuuuuuuuuuuguuc	acaaaaaaaaaagcccaaccc	uguuguacuuuuuuuuuuguucguugcauuuuuaggaacaaaaaaaaaagcccaaccc	77 +/- 19%	15	13	0	2	yes	hsa-miR-3613-5p:MIMAT0017990
chr3:176724099..176724152:-	1.9	cugugguuccuguaugaagaca	ucuucaugcaggaaccacauuu	cugugguuccuguaugaagacaguagcggugucuucaugcaggaaccacauuu	71 +/- 7%	121	121	0	0	yes	-
chr16:59542464..59542528:-	1.8	acuggacugugaaaccaggcacc	ugcuugaaggucacaguccaccuc	acuggacugugaaaccaggcacccccaccuagcccauaggugcuugaaggucacaguccaccuc	71 +/- 7%	7	7	0	0	yes	hsa-miR-378a-3p:MIMAT0000732
chr20:47810129..47810198:-	1.8	agagauggaacuugggugugag	cgcgcccaaguuccaucucauuc	cgcgcccaaguuccaucucauucaauaaguauuuaaugaacgagagaagagauggaacuugggugugag	71 +/- 7%	4	4	0	0	yes	hsa-miR-1273f:MIMAT0020601
chr6:135690253..135690314:+	1.8	ugguccuagucugggugcaaac	uuugcaccucugagaguggaaugac	uuugcaccucugagaguggaaugacuccuccuguggaguugguccuagucugggugcaaac	71 +/- 7%	3	1	0	2	yes	-
chr15:4088778..4088844:-	1.7	uggcucagcuccaacucugcc	cggggcuggggcugggccacc	uggcucagcuccaacucugcccacguuggccuuugggguucaaggcggggcuggggcugggccacc	71 +/- 7%	3	3	0	0	yes	hsa-miR-24-3p:MIMAT0000080
chr7:164844828..164844886:-	1.5	acccgucccguucguccccgga	cgggaacgucgagacuggagc	acccgucccguucguccccggacguugcucucuaccccgggaacgucgagacuggagc	71 +/- 7%	14	14	0	0	no	hsa-miR-1247-5p:MIMAT0005899
chr7:138904276..138904337:+	1.5	ccucagauucuggauuccuacc	uugaaaugcagagucugaucc	uugaaaugcagagucugauccaguaagucuagaauccugccucagauucuggauuccuacc	71 +/- 7%	2	1	0	1	yes	-
chr17:35647636..35647706:-	1.5	aagucccuguucgggcgcca	gcaggcccuggaggagggggugg	aagucccuguucgggcgccacguaucccggcccgcgggauagucgaagcaggcccuggaggagggggugg	71 +/- 7%	75	75	0	0	no	hsa-miR-2114-5p:MIMAT0011156
chr4:113453286..113453356:+	1.5	aagucccuguucgggcgcca	gcccuggaggagggggugg	aagucccuguucgggcgccacguaucccggcccgcgggauagucagagcaggcccuggaggagggggugg	71 +/- 7%	75	75	0	0	no	hsa-miR-2114-5p:MIMAT0011156
chr9:97043596..97043648:-	1.4	uuaacccuguacaguacuc	guucucuacagggugaug	guucucuacagggugaugcuaaaaugguggucauuaacccuguacaguacuc	71 +/- 7%	28	28	0	0	yes	-
chr1:201833036..201833095:+	1.3	cacagcaaguguagacaggca	ccugucugugccugcuguaca	ccugucugugccugcuguacaggugagcggauguucugcacagcaaguguagacaggca	71 +/- 7%	3	3	0	0	yes	hsa-miR-3120-3p:MIMAT0014982
chr9:99144420..99144457:+	1.2	aagcugccagcugaagaa	cucuagaggcggccgga	aagcugccagcugaagaagucucuagaggcggccgga	71 +/- 7%	23	23	0	0	no	hsa-miR-22-3p:MIMAT0000077
chr9:53379321..53379396:-	1.1	ucuucaaccuagggcucc	agaccccaaguggaggga	ucuucaaccuagggcuccuggcagcucugggagcacccgagcaccucagaggaagugagaccccaaguggaggga	71 +/- 7%	20	20	0	0	no	hsa-miR-676-5p:MIMAT0018203
chr7:164309589..164309643:-	1	uaugugggacgguaaaccauuu	cgguuuaccgucccacauacaua	cgguuuaccgucccacauacauauugaaaauguaugugggacgguaaaccauuu	71 +/- 7%	3	1	0	2	yes	hsa-miR-299-3p:MIMAT0000687
chrX:51519325..51519395:-	1	ugccugcccucuuccuccag	ggaggaaguggggcaagaagg	ggaggaaguggggcaagaaggaggaugcagagcugggccagacaugcucuugccugcccucuuccuccag	71 +/- 7%	3	3	0	0	yes	hsa-miR-4763-5p:MIMAT0019912
chr18:6923491..6923554:+	80.5	aggagugacagaguuagacuc	agucucgcucugucagucaggc	aggagugacagaguuagacucuuuuuuuuuuuuugagacagagucucgcucugucagucaggc	71 +/- 32%	155	153	0	2	yes	-
chr2:40118461..40118523:-	70.2	gagagaucagaggcgcagag	ccugugccuuuuaccucuuuaag	gagagaucagaggcgcagagugcgucaaugucaaugaagccugugccuuuuaccucuuuaag	71 +/- 32%	138	136	0	2	yes	-
chr1:212022328..212022385:-	14.7	uggccucuggguguguaccc	aguguacuuccugaggccucugggu	aguguacuuccugaggccucuggguauaaaauuccuguggccucuggguguguaccc	71 +/- 32%	20	17	0	3	yes	hsa-miR-4757-5p:MIMAT0019901
chr17:28813574..28813632:-	4	uguuguacuuuuuuuuuugu	acaaaaaaaaaagcccaaccc	uguuguacuuuuuuuuuuguucguugcauuuuuaggaacaaaaaaaaaagcccaaccc	71 +/- 21%	11	9	0	2	yes	hsa-miR-3613-5p:MIMAT0017990
chr8:96489951..96490009:-	3.6	acuggacuuggagucagaag	ucccugcucuaagucccauuu	acuggacuuggagucagaagaccuucauccaagucauucccugcucuaagucccauuu	71 +/- 10%	8474	8474	0	0	yes	hsa-miR-378a-3p:MIMAT0000732
chr8:1902655..1902719:+	3.4	uggccccagugucgugaucuc	ugucaugauaucuguguggccccac	ugucaugauaucuguguggccccacaguguuaugaugucugcguggccccagugucgugaucuc	71 +/- 10%	5	3	0	2	yes	-
chr2:101860128..101860172:-	3.2	acuggacuuggaguuaga	uuguuccaggcggguca	uuguuccaggcgggucauaguuguggacuggacuuggaguuaga	71 +/- 10%	9	9	0	0	yes	hsa-miR-378a-3p:MIMAT0000732
chr1:13052429..13052489:+	2.8	aaguaguuucaugauaaaggg	uuuuaucugaaacugcuugagg	aaguaguuucaugauaaagggugugugggaggucaaccuuuuaucugaaacugcuugagg	70 +/- 9%	3	2	0	1	yes	-
chr16:63341749..63341805:-	2.5	cagccccgggcacuucucugc	ggggagggcuggggggaagcc	ggggagggcuggggggaagccgggucgaaauccggcagccccgggcacuucucugc	70 +/- 9%	21	21	0	0	yes	-
chr9:67567377..67567444:-	2.4	ucccccagucuggccacagagc	ccugcagcccugccuggggugug	ucccccagucuggccacagagccuuuaauauccagagaaucaggccugcagcccugccuggggugug	70 +/- 9%	7	7	0	0	yes	hsa-miR-361-3p:MIMAT0004682
chr16:56897246..56897302:+	2.4	cagccccgggcacuucucugc	ggggagggcuugggggaaguc	ggggagggcuugggggaagucgggccgaaauccggcagccccgggcacuucucugc	70 +/- 9%	21	21	0	0	yes	-
chr7:163376692..163376752:-	2.4	ucgaggagcucacagucuag	cucuucggggcucccgaga	cucuucggggcucccgagacacagaaacagacaccugcccucgaggagcucacagucuag	70 +/- 9%	4645	4645	0	0	yes	hsa-miR-151a-5p:MIMAT0004697
chr13:75089548..75089609:+	2.3	uccugggcuuuggcagacagc	uguugagcugagcccagggug	uccugggcuuuggcagacagcucuuugccucucauacagcuguugagcugagcccagggug	70 +/- 9%	5	5	0	0	yes	hsa-miR-939-3p:MIMAT0022939
chr1:213763516..213763573:-	2.2	ucugugagaccaaagaacuac	uguucuuuggucuuucagcca	uguucuuuggucuuucagccaugaccugaccuucugucugugagaccaaagaacuac	70 +/- 9%	6	6	0	0	yes	hsa-miR-4677-3p:MIMAT0019761
chr16:18891355..18891409:-	2	uuuccggcucgcgugggugug	gacccacccggccgggaaua	gacccacccggccgggaauagugcuccugguuguuuccggcucgcgugggugug	70 +/- 9%	244	244	0	0	no	hsa-miR-1180:MIMAT0005825
chr18:29631715..29631773:+	2	aggccuaagccaucucugaaga	cuucaaaggggcuuaggucuga	aggccuaagccaucucugaagaugaaaacuauccaucuucaaaggggcuuaggucuga	70 +/- 9%	2	1	0	1	yes	-
chr3:123916880..123916937:-	2	aagcaagucaggcuuggcaaag	ugucaaccuugacuuccuc	ugucaaccuugacuuccucugacaugucauggccaaagcaagucaggcuuggcaaag	70 +/- 9%	4	3	0	1	yes	-
chr1:213763515..213763574:-	4.7	ucugugagaccaaagaacuacu	uuguucuuuggucuuucagcca	uuguucuuuggucuuucagccaugaccugaccuucugucugugagaccaaagaacuacu	69 +/- 14%	11	11	0	0	yes	hsa-miR-4677-3p:MIMAT0019761
chr2:19051377..19051440:-	0.9	aaguuucucugaauguguagaac	acuacacuuucagagaucauuuc	acuacacuuucagagaucauuucuguaguuuaugauuagaaaguuucucugaauguguagaac	50 +/- 7%	74	74	0	0	yes	-
chr19:59640353..59640412:+	0.9	cgucaauuacguuugcacuga	ggugcaaaaguaauugggguu	ggugcaaaaguaauugggguuuuugccauuaccuuuaacgucaauuacguuugcacuga	50 +/- 7%	26	26	0	0	yes	-
chr2:32492880..32492933:+	0.8	cuggacuuggagccagaagac	uuacauucuggcuccacugucaucau	cuggacuuggagccagaagacccagguuuacauucuggcuccacugucaucau	50 +/- 7%	23	23	0	0	yes	-
chr9:816782..816846:-	0.7	uccugucuuuccuuguuggagc	cgcaacaaggaaggacaagagg	cgcaacaaggaaggacaagaggugugagccauacucccggccuccugucuuuccuuguuggagc	50 +/- 7%	2	2	0	0	yes	hsa-miR-4421:MIMAT0018934
chr3:189830110..189830198:-	0.6	caccuggccuacacccagua	cugcuggccucaggugau	cugcuggccucaggugauccuccugccucagccuccccaagugcugggauuacaggcacgagcgaccacaccuggccuacacccagua	50 +/- 7%	17	16	1	0	yes	-
chr19:56662177..56662257:+	0.6	ugagcagagaaagccgagguggc	caccugacucuccugcccccc	ugagcagagaaagccgagguggccgggccaaggggugacucccugagaccccgaggggccaccugacucuccugcccccc	50 +/- 7%	2	2	0	0	yes	hsa-miR-4468:MIMAT0018995
chr1:17505356..17505423:+	0.6	auggacuuggagucagaaggcu	cguucgggcuucagucccuuaaauua	cguucgggcuucagucccuuaaauuacccuucuuuggaaggaauaauggacuuggagucagaaggcu	50 +/- 7%	468	468	0	0	yes	-
chr9:123805384..123805425:+	0.6	aagcugccaguucaagaac	ucagggaucuggcacauca	ucagggaucuggcacaucagugaagcugccaguucaagaac	50 +/- 7%	10209	10209	0	0	yes	-
chr20:78265916..78265983:+	0.6	auguacuucugccuagcu	uaugguagaagugacacug	uaugguagaagugacacugugacuuuggagucuaggucauaaaaaugccauguacuucugccuagcu	50 +/- 7%	22	22	0	0	yes	-
chr2:40118463..40118523:-	0.6	gagagaucagaggcgcagag	cugugccuuuuaccucuuua	gagagaucagaggcgcagagugcgucaaugucaaugaagccugugccuuuuaccucuuua	50 +/- 7%	379	379	0	0	yes	-
chr5:63114198..63114255:-	0.5	cuggacugagccacgcuac	gguguggcucaguccaagu	gguguggcucaguccaagucugagcacgugagcaaugccuggacugagccacgcuac	50 +/- 7%	1	1	0	0	yes	hsa-miR-1269a:MIMAT0005923
chr16:49761736..49761810:+	0.5	uggcuaggacuguggaggggagc	uugcccagaguuggggguuaggggagg	uggcuaggacuguggaggggagcugcuggccauggcugcuuuguaguuugcccagaguuggggguuaggggagg	50 +/- 7%	2	2	0	0	yes	hsa-miR-6069:MIMAT0023694
chr3:44174834..44174894:-	0.4	uugggauuauguguuugaacc	cucacacauguaaucccagca	cucacacauguaaucccagcacuucaggagaagaaaugguugggauuauguguuugaacc	50 +/- 7%	3	3	0	0	yes	hsa-miR-5089-5p:MIMAT0021081
chr10:67850046..67850102:+	0.4	aaacaagaggauuggacc	uccauuccucuccucggg	uccauuccucuccucgggccucaauuuacccaccuguaaaacaagaggauuggacc	50 +/- 7%	59	59	0	0	yes	-
chr10:83327878..83327931:+	0.3	ucaguuacucucccuggcacu	ugccagaagagugacugaga	ucaguuacucucccuggcacuuggaggucccagugccagaagagugacugaga	50 +/- 7%	1	1	0	0	yes	hsa-miR-935:MIMAT0004978
chr14:55319364..55319422:-	0.3	uacucagcagccccgggccgcuc	gcgcccgggaagcagccgggcaca	gcgcccgggaagcagccgggcacagagcuaaucuguacucagcagccccgggccgcuc	50 +/- 7%	2	2	0	0	yes	hsa-miR-512-5p:MIMAT0002822
chr14:8979130..8979179:-	0.3	aagagugagcaggaaaaagcaaaa	uugcuuuucaccuucugaucugug	uugcuuuucaccuucugaucugugaaagagugagcaggaaaaagcaaaa	50 +/- 7%	2	2	0	0	yes	hsa-miR-5586-3p:MIMAT0022288
chr20:20741936..20741991:+	0.2	cuggaggggagggggcuggcug	cugggcccccuucgcuccagcu	cuggaggggagggggcuggcugugccucucacccugggcccccuucgcuccagcu	50 +/- 7%	1	1	0	0	yes	hsa-miR-6515-5p:MIMAT0025486
chr14:1908091..1908145:+	0.2	cugugggcccucuccgcacca	gagcggugagggcauacagug	gagcggugagggcauacagugucaccaaguccacugugggcccucuccgcacca	50 +/- 7%	1	1	0	0	yes	hsa-miR-4296:MIMAT0016845
chrX:67327501..67327587:-	0.2	ucugggauuauacuugugagcc	cucacgccuguaaucccagcac	ucugggauuauacuugugagccaccgugcugguuaucuauuuuaccaacagcuagacaugguggcucacgccuguaaucccagcac	50 +/- 7%	1	1	0	0	yes	hsa-miR-6506-5p:MIMAT0025468
chr10:79247283..79247344:+	0.1	uguccucuagggccugcaguc	gagcaggcccugggagacagg	gagcaggcccugggagacagggaaaagcacaccaggagcuuguccucuagggccugcaguc	50 +/- 7%	1	1	0	0	yes	hsa-miR-3909:MIMAT0018183
chr14:76266237..76266286:-	0.1	cgaggaugcaguuaacugugau	cacaguuaacugcagccugggu	cgaggaugcaguuaacugugauugugucacaguuaacugcagccugggu	50 +/- 7%	1	1	0	0	yes	hsa-miR-3605-5p:MIMAT0017981
chr14:123008667..123008729:-	0.1	agagggcaguggagaguggacaga	uccccauucucuagugucccuaggg	uccccauucucuagugucccuagggcccugggcugggcagagggcaguggagaguggacaga	50 +/- 7%	1	1	0	0	yes	hsa-miR-3616-3p:MIMAT0017996
chr3:56592609..56592661:-	0.1	aaaaguaauugugggcuuugc	aauggccgcaauuacuuuuac	aaaaguaauugugggcuuugccauuacuuuuaauggccgcaauuacuuuuac	50 +/- 7%	2	2	0	0	yes	hsa-miR-559:MIMAT0003223
chr1:112589381..112589438:+	0	caccacuucuacuccagucccc	uggcuggagcgagagugcggcc	uggcuggagcgagagugcggccuguuucuugagggcaccacuucuacuccagucccc	50 +/- 7%	1	1	0	0	yes	hsa-miR-1255b-2-3p:MIMAT0022725
chr1:123224009..123224064:-	0	uguguggagacaggagcccagccc	gcuggagccccugcaaugccccagg	gcuggagccccugcaaugccccaggacaccuuguguggagacaggagcccagccc	50 +/- 7%	1	1	0	0	yes	hsa-miR-3911:MIMAT0018185
chr13:45768837..45768883:+	0	cccgagccggaucggcggcc	acuccgagccggcgcggaug	cccgagccggaucggcggccgcccggacuccgagccggcgcggaug	50 +/- 7%	1	1	0	0	yes	hsa-miR-615-3p:MIMAT0003283
chr16:76568325..76568408:-	0	acaggacaaggcauggccccgaga	ucggaggucccacaugccccaucuggugg	ucggaggucccacaugccccaucugguggcuccuccgguguccucacaggacacuugacacaggacaaggcauggccccgaga	50 +/- 7%	1	1	0	0	yes	hsa-miR-4436a:MIMAT0018952
chr8:23344142..23344209:-	0	uccuggcagugacuccga	ugaccuggcaggaug	ugaccuggcaggauggcgccaccaccagcuggaguaaagcugggcgcguuccuggcagugacuccga	50 +/- 7%	1	1	0	0	yes	hsa-miR-221-5p:MIMAT0004568
chr17:90323139..90323198:-	0	cuggggcccugggcagaccuc	ggacugcuggaggaccgcagag	ggacugcuggaggaccgcagagaaaugagccuacuccucuggggcccugggcagaccuc	50 +/- 7%	1	1	0	0	yes	hsa-miR-1227-5p:MIMAT0022941
chr1:160647625..160647695:+	0	gcccugggguagaaccugcuacgca	ugaagcgugguacgccaccacauucag	gcccugggguagaaccugcuacgcacugggcaaggagauugugugaagcgugguacgccaccacauucag	50 +/- 7%	1	1	0	0	yes	hsa-miR-4292:MIMAT0016919
chr9:57772673..57772735:-	0	uuggggagugcucagaaccag	gguuccugacacuccucagug	gguuccugacacuccucagugcugcguccuggggggccuccuuggggagugcucagaaccag	50 +/- 7%	1	1	0	0	yes	hsa-miR-3150a-3p:MIMAT0015023
chr16:34777261..34777319:-	0	cagguaguccagcaaugucag	ggcacuggugggccacccgcu	ggcacuggugggccacccgcucagagccugucuugagcagguaguccagcaaugucag	50 +/- 7%	1	1	0	0	yes	hsa-miR-196a-5p:MIMAT0000226
chr20:66604648..66604713:+	0	ucacccugggacugugguucca	gagccacggccuucuagggaccug	ucacccugggacugugguuccaaggaugagagcaggcguuggagccacggccuucuagggaccug	50 +/- 7%	1	1	0	0	yes	hsa-miR-3620-3p:MIMAT0018001
chr10:29091320..29091386:+	0	ugcagacucuuggauuccaccc	guggaguccaggaaucugcauu	ugcagacucuuggauuccacccccagagaauccguaaaccggggguggaguccaggaaucugcauu	50 +/- 7%	8	8	0	0	yes	-
chr3:176724099..176724152:-	1.9	cugugguuccuguaugaagaca	ucuucaugcaggaaccacauuu	cugugguuccuguaugaagacaguagcggugucuucaugcaggaaccacauuu	50 +/- 11%	92	92	0	0	yes	-
chr13:4020999..4021075:+	1.9	uggaacuccuggcauguaguga	acugcauccuggaacuccugg	acugcauccuggaacuccuggcauguagugaugcgacagcagcucacugcauccuggaacuccuggcauguaguga	50 +/- 11%	14	14	0	0	yes	-
chr9:67567377..67567444:-	1.9	ucccccagucuggccacagagcc	ccugcagcccugccuggggugug	ucccccagucuggccacagagccuuuaauauccagagaaucaggccugcagcccugccuggggugug	50 +/- 11%	6	6	0	0	yes	hsa-miR-361-3p:MIMAT0004682
chr13:4020954..4021030:+	1.8	uggaacuccuggcauguaguga	acugcauccuggaacuccugg	acugcauccuggaacuccuggcauguagugaugcgacagcagcucacugcauccuggaacuccuggcauguaguga	50 +/- 11%	14	14	0	0	yes	-
chr9:125976487..125976543:-	1.8	uugggugacauuuguagaug	uuuacacgugucgcucggga	uugggugacauuuguagaugucucuguaucuugacauuuacacgugucgcucggga	50 +/- 11%	5	5	0	0	yes	hsa-miR-1262:MIMAT0005914
chr17:35647636..35647706:-	1.5	aagucccuguucgggcgcca	gcaggcccuggaggagggggugg	aagucccuguucgggcgccacguaucccggcccgcgggauagucgaagcaggcccuggaggagggggugg	50 +/- 11%	30	30	0	0	no	hsa-miR-2114-5p:MIMAT0011156
chr4:113453286..113453356:+	1.5	aagucccuguucgggcgcca	gcccuggaggagggggugg	aagucccuguucgggcgccacguaucccggcccgcgggauagucagagcaggcccuggaggagggggugg	50 +/- 11%	30	30	0	0	no	hsa-miR-2114-5p:MIMAT0011156
chr14:109970181..109970240:-	1.3	uggcaguggaguuagugauug	aucagcuaaugacacugccuac	uggcaguggaguuagugauuguaaccaccacaguacaaucagcuaaugacacugccuac	50 +/- 11%	4	4	0	0	yes	hsa-miR-34a-5p:MIMAT0000255
chr12:37847355..37847408:-	1.3	aaaaguaauugcaguuuugcc	caaaacugcaguuacuuuugu	aaaaguaauugcaguuuugccaauguaaugcccaaaacugcaguuacuuuugu	50 +/- 11%	4	4	0	0	yes	hsa-miR-559:MIMAT0003223
chr9:99144420..99144457:+	1.2	aagcugccagcugaagaa	cucuagaggcggccgga	aagcugccagcugaagaagucucuagaggcggccgga	50 +/- 11%	20	20	0	0	no	hsa-miR-22-3p:MIMAT0000077
chr13:75089548..75089609:+	1.2	uccugggcuuuggcagacagc	uguugagcugagcccagggug	uccugggcuuuggcagacagcucuuugccucucauacagcuguugagcugagcccagggug	50 +/- 11%	3	3	0	0	yes	hsa-miR-939-3p:MIMAT0022939
chr12:52619657..52619712:-	1.1	uaggccuuuagaucaucuaa	agaugagcuaaaggccuaua	uaggccuuuagaucaucuaaagaguauucaacauuagaugagcuaaaggccuaua	50 +/- 11%	3	3	0	0	yes	hsa-miR-3142:MIMAT0015011
chr9:53379321..53379396:-	1.1	ucuucaaccuagggcucc	agaccccaaguggaggga	ucuucaaccuagggcuccuggcagcucugggagcacccgagcaccucagaggaagugagaccccaaguggaggga	50 +/- 11%	110	110	0	0	no	hsa-miR-676-5p:MIMAT0018203
chr16:11829814..11829892:+	4.1	ugcggggcuagggcuaacagc	uguugccacuaaccucaacc	ugcggggcuagggcuaacagcagucuuacugaagguuuccuggaaaccacgcacaugcuguugccacuaaccucaacc	46 +/- 50%	10	10	0	0	yes	hsa-miR-744-5p:MIMAT0004945
chr3:176724099..176724152:-	1.9	cugugguuccuguaugaagaca	ucuucaugcaggaaccacauuu	cugugguuccuguaugaagacaguagcggugucuucaugcaggaaccacauuu	42 +/- 11%	83	83	0	0	yes	-
chr8:1902655..1902719:+	1.8	ugucaugauaucuguguggcccca	uggccccagugucgugaucuc	ugucaugauaucuguguggccccacaguguuaugaugucugcguggccccagugucgugaucuc	42 +/- 11%	2	1	0	1	yes	-
chr15:10478591..10478655:-	1.8	agaauugcguuuggacaaucag	agauguccagccacaauucucg	agauguccagccacaauucucgguuggccgcagacucguacaagaauugcguuuggacaaucag	42 +/- 11%	3	2	0	1	no	hsa-miR-2964a-3p:MIMAT0019748
chr14:109970181..109970240:-	1.8	uggcaguggaguuagugauug	aucagcuaaugacacugccuac	uggcaguggaguuagugauuguaaccaccacaguacaaucagcuaaugacacugccuac	42 +/- 11%	5	5	0	0	yes	hsa-miR-34a-5p:MIMAT0000255
chr5:72847321..72847376:+	1.8	ggucuguauagagcuugugccc	acacaaucucuauacagacuu	ggucuguauagagcuugugcccagagguuccuggacacaaucucuauacagacuu	42 +/- 11%	2	1	0	1	yes	-
chr4:32922243..32922297:-	1.6	ucgagaauugcguuuggacaa	guccagacucaacucucggcc	guccagacucaacucucggccagagccauagacucgagaauugcguuuggacaa	42 +/- 11%	11	11	0	0	yes	-
chr9:97043596..97043648:-	1.4	uuaacccuguacaguacuc	guucucuacagggugaug	guucucuacagggugaugcuaaaaugguggucauuaacccuguacaguacuc	42 +/- 11%	12	12	0	0	yes	-
chr2:179144831..179144891:+	1.4	aagcaggauucagacuacaaua	uugucguucccccugcucaa	aagcaggauucagacuacaauauagcugcuaagugcuguguugucguucccccugcucaa	42 +/- 11%	9	9	0	0	yes	hsa-miR-6165:MIMAT0024782
chr9:67567377..67567444:-	1.4	ucccccagucuggccacagagcc	ccugcagcccugccuggggugug	ucccccagucuggccacagagccuuuaauauccagagaaucaggccugcagcccugccuggggugug	42 +/- 11%	5	5	0	0	yes	hsa-miR-361-3p:MIMAT0004682
chrX:116366553..116366607:+	1.3	acuagacuuggagucagaag	ugugacauuaaguuagugc	acuagacuuggagucagaagacaauuuaugugcuaugugacauuaaguuagugc	42 +/- 11%	17	17	0	0	yes	-
chr9:103084714..103084773:-	1.3	ucgaccggaccucgaccggc	cucggcguggcgucggucg	ucgaccggaccucgaccggcucgucuguguugccaaucgacucggcguggcgucggucg	42 +/- 11%	511	479	0	32	no	hsa-miR-1307-5p:MIMAT0022727
chr9:99144420..99144457:+	1.2	aagcugccagcugaagaa	cucuagaggcggccgga	aagcugccagcugaagaagucucuagaggcggccgga	42 +/- 11%	15	15	0	0	no	hsa-miR-22-3p:MIMAT0000077
chr18:51716515..51716573:-	1.2	uuuagugugauaauggcguu	caccauugucacacuccaca	uuuagugugauaauggcguuugauaguuuagacacaaacaccauugucacacuccaca	42 +/- 11%	4	4	0	0	yes	hsa-miR-3591-5p:MIMAT0019876
chr14:38921264..38921340:+	1	ggcgggcggccgcgaggcc	ccgaggaggcgcaggcccg	ggcgggcggccgcgaggccuccgccgcugccggacgcuucgcgagggacagcugaggccgaggaggcgcaggcccg	42 +/- 11%	3	2	1	0	yes	hsa-miR-4767:MIMAT0019919
chr3:47373132..47373181:-	1	ccgcacuguggguacuugc	agggcacgcacagcguccgug	ccgcacuguggguacuugcugcuccagcagggcacgcacagcguccgug	42 +/- 11%	48	48	0	0	no	hsa-miR-106b-3p:MIMAT0004672
chr12:82680493..82680557:-	1	uugacuguucucccuggccccuca	aggggcagagaggagggugagg	aggggcagagaggagggugagggucucucaggacccacccuugacuguucucccuggccccuca	42 +/- 11%	3	3	0	0	yes	hsa-miR-943:MIMAT0004986
chr18:51716515..51716573:-	3.8	uuuagugugauaauggcguu	caccauugucacacuccaca	uuuagugugauaauggcguuugauaguuuagacacaaacaccauugucacacuccaca	40 +/- 19%	9	9	0	0	yes	hsa-miR-3591-5p:MIMAT0019876
chr8:96489951..96490009:-	3.6	acuggacuuggagucagaag	ucccugcucuaagucccauuu	acuggacuuggagucagaagaccuucauccaagucauucccugcucuaagucccauuu	40 +/- 19%	4593	4593	0	0	yes	hsa-miR-378a-3p:MIMAT0000732
chr16:59542464..59542528:-	2.8	acuggacugugaaaccaggcacc	ugcuugaaggucacaguccaccuc	acuggacugugaaaccaggcacccccaccuagcccauaggugcuugaaggucacaguccaccuc	40 +/- 16%	9	9	0	0	yes	hsa-miR-378a-3p:MIMAT0000732
chr16:63341749..63341805:-	2.5	cagccccgggcacuucucugc	ggggagggcuggggggaagcc	ggggagggcuggggggaagccgggucgaaauccggcagccccgggcacuucucugc	40 +/- 16%	42	42	0	0	yes	-
chr16:56897246..56897302:+	2.4	cagccccgggcacuucucugc	ggggagggcuugggggaaguc	ggggagggcuugggggaagucgggccgaaauccggcagccccgggcacuucucugc	40 +/- 16%	42	42	0	0	yes	-
chr7:163376692..163376752:-	2.4	ucgaggagcucacagucuag	cucuucggggcucccgaga	cucuucggggcucccgagacacagaaacagacaccugcccucgaggagcucacagucuag	40 +/- 16%	3004	3004	0	0	yes	hsa-miR-151a-5p:MIMAT0004697
chr1:213763516..213763573:-	2.2	ucugugagaccaaagaacuac	uguucuuuggucuuucagcca	uguucuuuggucuuucagccaugaccugaccuucugucugugagaccaaagaacuac	40 +/- 16%	6	6	0	0	yes	hsa-miR-4677-3p:MIMAT0019761
chr16:18891355..18891409:-	2	uuuccggcucgcgugggugug	gacccacccggccgggaaua	gacccacccggccgggaauagugcuccugguuguuuccggcucgcgugggugug	40 +/- 16%	98	98	0	0	no	hsa-miR-1180:MIMAT0005825
chr9:67567377..67567444:-	1.9	ucccccagucuggccacagagc	ccugcagcccugccuggggugug	ucccccagucuggccacagagccuuuaauauccagagaaucaggccugcagcccugccuggggugug	38 +/- 16%	6	6	0	0	yes	hsa-miR-361-3p:MIMAT0004682
chr3:176724099..176724152:-	1.9	cugugguuccuguaugaagaca	ucuucaugcaggaaccacauuu	cugugguuccuguaugaagacaguagcggugucuucaugcaggaaccacauuu	38 +/- 16%	27	27	0	0	yes	-
chr4:113453286..113453356:+	1.5	aagucccuguucgggcgcca	gcccuggaggagggggugg	aagucccuguucgggcgccacguaucccggcccgcgggauagucagagcaggcccuggaggagggggugg	38 +/- 16%	46	46	0	0	no	hsa-miR-2114-5p:MIMAT0011156
chr20:87818449..87818510:+	1.5	ucucaggaugccgcugcacg	ugcugugugcgccaccuagauc	ucucaggaugccgcugcacgugccgccaccggcagccauugcugugugcgccaccuagauc	38 +/- 16%	6	6	0	0	yes	hsa-miR-3664-3p:MIMAT0019220
chr17:35647636..35647706:-	1.5	aagucccuguucgggcgcca	gcaggcccuggaggagggggugg	aagucccuguucgggcgccacguaucccggcccgcgggauagucgaagcaggcccuggaggagggggugg	38 +/- 16%	46	46	0	0	no	hsa-miR-2114-5p:MIMAT0011156
chrX:116366553..116366607:+	1.3	acuagacuuggagucagaag	ugugacauuaaguuagugc	acuagacuuggagucagaagacaauuuaugugcuaugugacauuaaguuagugc	38 +/- 16%	14	14	0	0	yes	-
chr7:163376692..163376752:-	2.4	ucgaggagcucacagucuag	cucuucggggcucccgaga	cucuucggggcucccgagacacagaaacagacaccugcccucgaggagcucacagucuag	34 +/- 19%	1806	1806	0	0	yes	hsa-miR-151a-5p:MIMAT0004697
chr1:213763516..213763573:-	2.2	ucugugagaccaaagaacuac	uguucuuuggucuuucagcca	uguucuuuggucuuucagccaugaccugaccuucugucugugagaccaaagaacuac	34 +/- 19%	6	6	0	0	yes	hsa-miR-4677-3p:MIMAT0019761
chr10:84714591..84714645:-	2.2	aacagcaaucgcucuuuugga	ucugaaagagcaguugguguu	ucugaaagagcaguugguguuuauuuuuuacuaaacagcaaucgcucuuuugga	34 +/- 19%	6	5	0	1	yes	hsa-miR-3120-3p:MIMAT0014982
chr13:63862324..63862382:-	2	caacuccugggguugcuauuc	aauggugcuucuuggaguugua	caacuccugggguugcuauucacagaccaugaugugaauggugcuucuuggaguugua	34 +/- 19%	2	1	0	1	yes	-
chr16:18891355..18891409:-	2	uuuccggcucgcgugggugug	gacccacccggccgggaaua	gacccacccggccgggaauagugcuccugguuguuuccggcucgcgugggugug	34 +/- 19%	81	81	0	0	no	hsa-miR-1180:MIMAT0005825
chr16:59542465..59542527:-	2.8	cuggacugugaaaccaggcacc	ugcuugaaggucacaguccaccu	cuggacugugaaaccaggcacccccaccuagcccauaggugcuugaaggucacaguccaccu	29 +/- 15%	9	9	0	0	yes	hsa-miR-1269a:MIMAT0005923
chr9:125976487..125976543:-	2.8	uugggugacauuuguagaug	cauuuacacgugucgcucggga	uugggugacauuuguagaugucucuguaucuugacauuuacacgugucgcucggga	29 +/- 15%	7	5	0	2	yes	hsa-miR-1262:MIMAT0005914
chr17:90323139..90323199:-	2.6	ucuggggcccugggcagaccuc	aggacugcuggaggaccgcagag	aggacugcuggaggaccgcagagaaaugagccuacuccucuggggcccugggcagaccuc	29 +/- 15%	3	2	0	1	yes	-
chr16:63341749..63341805:-	2.5	cagccccgggcacuucucugc	ggggagggcuggggggaagcc	ggggagggcuggggggaagccgggucgaaauccggcagccccgggcacuucucugc	29 +/- 15%	26	26	0	0	yes	-
chr16:56897246..56897302:+	2.4	cagccccgggcacuucucugc	ggggagggcuugggggaaguc	ggggagggcuugggggaagucgggccgaaauccggcagccccgggcacuucucugc	29 +/- 15%	26	26	0	0	yes	-
chr7:163376692..163376752:-	2.4	ucgaggagcucacagucuag	cucuucggggcucccgaga	cucuucggggcucccgagacacagaaacagacaccugcccucgaggagcucacagucuag	29 +/- 15%	3639	3639	0	0	yes	hsa-miR-151a-5p:MIMAT0004697
chr16:33719592..33719634:+	2.3	gaaccugggcucagacacc	cugggcugggcugggcuggaca	cugggcugggcugggcuggacaagaaccugggcucagacacc	29 +/- 15%	3	2	0	1	no	hsa-miR-490-3p:MIMAT0002806
chr8:146751538..146751607:-	2.1	ccuguuugucugaaauucaaau	uuugaauuccagacaaacaguaa	ccuguuugucugaaauucaaauuuaacuguauccuguacaguaaauuuugaauuccagacaaacaguaa	29 +/- 15%	4	3	0	1	yes	-
chr16:18891355..18891409:-	2	uuuccggcucgcgugggugug	gacccacccggccgggaaua	gacccacccggccgggaauagugcuccugguuguuuccggcucgcgugggugug	29 +/- 15%	170	170	0	0	no	hsa-miR-1180:MIMAT0005825
