# Supplementary material for: Age-associated miRNA Alterations in Skeletal Muscle from Rhesus Monkeys reversed by caloric restriction
Source: Aging (Albany NY). 2013 Sep 9;5(9):692–703. doi: 10.18632/aging.100598 (PMC3808701; doi:10.18632/aging.100598)
Supplement: Supplementary file 3 [file aging-05-692-s003.xlsx]

## Sheet: Sheet1
precursor coordinate	miRDeep2 score	consensus mature sequence	consensus star sequence	consensus precursor sequence	estimated probability	total read count	mature read count	loop read count	star read count	significant	example miRBase miRNA with the same seed
chr13:101252003..101252086:+	9.8	ucagauuaccuaaaugaacacc	gucauuuagguagucugaugcc	gucauuuagguagucugaugccugcuacugaugacauacaacguaagugcucauuugggcaucagauuaccuaaaugaacacc	92 +/- 7%	17	14	0	3	yes	-
chr12:41976864..41976921:+	9.8	ugugcagaacucauagaaggc	uucugugaguccuaugcagaac	uucugugaguccuaugcagaacucauaggggugcucugugcagaacucauagaaggc	92 +/- 7%	17	15	0	2	yes	-
chr12:85389055..85389113:-	7.3	aaaagucauugcgguuuuugcc	aaagaucgcaaugacuuuugc	aaaagucauugcgguuuuugccacugaaaguaauggcaaagaucgcaaugacuuuugc	92 +/- 6%	12	11	0	1	yes	-
chr3:93319819..93319883:+	7.2	gcagaaguaauuaugguuuu	agaccucaauuacuuuugcacca	gcagaaguaauuaugguuuuugccaugaaaaguaauggcaaagaccucaauuacuuuugcacca	92 +/- 6%	12	8	0	4	yes	-
chr10:29091320..29091387:+	6.6	ugcagacucuuggauuccaccc	uggaguccaggaaucugcauuu	ugcagacucuuggauuccacccccagagaauccguaaaccggggguggaguccaggaaucugcauuu	92 +/- 6%	11	9	0	2	yes	-
chr14:374652..374714:+	6.1	cccagaggagccuggagccac	uggcuccuugcaccuccggcc	uggcuccuugcaccuccggccgccuguggauggggaaggugcccagaggagccuggagccac	92 +/- 6%	9	8	0	1	yes	-
chr1:120066850..120066909:-	7.9	acacauggccaaaacagagaag	uucucuguuucggccacgugug	uucucuguuucggccacgugugaggggcugugaguacacacauggccaaaacagagaag	92 +/- 6%	6	4	0	2	yes	hsa-miR-4717-3p:MIMAT0019830
chr9:118617501..118617559:-	7.2	agaaguaauugcaguuuuugc	caaaaauggcaaugacuugugc	agaaguaauugcaguuuuugccguuacuuuucuuggcaaaaauggcaaugacuugugc	92 +/- 6%	5	4	0	1	yes	hsa-miR-548ao-5p:MIMAT0021029
chr1:199850276..199850339:+	7	uuugccaucaaaauuaaaagc	uuuuaacuuugauggcaaagaca	uuuuaacuuugauggcaaagacauagauuguuuagcuacaccuuugccaucaaaauuaaaagc	92 +/- 6%	5	2	0	3	yes	hsa-miR-4776-3p:MIMAT0019933
chr13:26638811..26638859:-	5.3	acugggcuuggagucagaagac	cuucccacucugacucugaugc	acugggcuuggagucagaagacccagcuucccacucugacucugaugc	92 +/- 5%	58	58	0	0	yes	hsa-miR-378g:MIMAT0018937
chr14:94546886..94546938:-	5.4	caaaaacugcaaucacuuu	agugauugugauuuuugcc	agugauugugauuuuugccgcuacuuuuaauggcaaaaacugcaaucacuuu	92 +/- 5%	51	51	0	0	yes	hsa-miR-548x-3p:MIMAT0015081
chr13:26638811..26638859:-	5.3	acugggcuuggagucagaagac	cuucccacucugacucugaugc	acugggcuuggagucagaagacccagcuucccacucugacucugaugc	92 +/- 5%	47	47	0	0	yes	hsa-miR-378g:MIMAT0018937
chr18:51716515..51716573:-	5.2	uuuagugugauaauggcguu	aacaccauugucacacuccaca	uuuagugugauaauggcguuugauaguuuagacacaaacaccauugucacacuccaca	92 +/- 5%	44	43	0	1	yes	hsa-miR-3591-5p:MIMAT0019876
chr9:125976487..125976543:-	5.2	uugggugacauuuguagaug	cauuuacacgugucgcucggga	uugggugacauuuguagaugucucuguaucuugacauuuacacgugucgcucggga	92 +/- 5%	40	38	0	2	yes	hsa-miR-1262:MIMAT0005914
chr11:105706126..105706186:+	5.8	ugugggaccucuggccuuggc	caaggccacagguccuacaac	caaggccacagguccuacaacagggcuggaaagcacaccugugggaccucuggccuuggc	92 +/- 5%	30	30	0	0	yes	hsa-miR-4648:MIMAT0019710
chr5:26247110..26247168:-	5.1	aaaaguaauugcaguuuuu	caaaacuguaaauacuuuugca	aaaaguaauugcaguuuuugccauugaaaguaauggcaaaacuguaaauacuuuugca	92 +/- 5%	29	24	0	5	yes	hsa-miR-559:MIMAT0003223
chr11:75794211..75794266:-	5.7	caaaaguaauugugguuuuug	caaaagccgcaauaacuu	caaaaguaauugugguuuuugacauuaaaaguaauggcaaaagccgcaauaacuu	92 +/- 5%	25	24	0	1	yes	hsa-miR-548n:MIMAT0005916
chr18:51716515..51716573:-	5.2	uuuagugugauaauggcguu	caccauugucacacuccaca	uuuagugugauaauggcguuugauaguuuagacacaaacaccauugucacacuccaca	92 +/- 5%	23	23	0	0	yes	hsa-miR-3591-5p:MIMAT0019876
chr3:95309196..95309260:+	5.3	gaggccacaagcucugccccc	gggcagagcuugacauggccugcc	gaggccacaagcucugcccccacuggaaacugaggccugggggcagagcuugacauggccugcc	92 +/- 5%	19	19	0	0	yes	hsa-miR-4717-5p:MIMAT0019829
chr1:213763516..213763573:-	5.1	ucugugagaccaaagaacuac	uguucuuuggucuuucagcca	uguucuuuggucuuucagccaugaccugaccuucugucugugagaccaaagaacuac	92 +/- 5%	17	17	0	0	yes	hsa-miR-4677-3p:MIMAT0019761
chr3:56592609..56592661:-	5.1	aaaaguaauugugggcuuugc	aauggccgcaauuacuuuuac	aaaaguaauugugggcuuugccauuacuuuuaauggccgcaauuacuuuuac	92 +/- 5%	17	17	0	0	yes	hsa-miR-559:MIMAT0003223
chr4:110159736..110159794:-	5.3	aaaaguaauugugggcuuugc	aaaaaccgcaauuacuuuugc	aaaaguaauugugggcuuugcuauagaaaguaaagguaaaaaccgcaauuacuuuugc	92 +/- 5%	16	16	0	0	yes	hsa-miR-559:MIMAT0003223
chr11:105706126..105706186:+	5.8	ugugggaccucuggccuuggc	caaggccacagguccuacaac	caaggccacagguccuacaacagggcuggaaagcacaccugugggaccucuggccuuggc	92 +/- 5%	12	12	0	0	yes	hsa-miR-4648:MIMAT0019710
chr2:39064942..39065002:-	5.6	uaugucugacuauacaaagcc	cuuuguauagucagacauauu	uaugucugacuauacaaagccuauguaaaaguucaugggcuuuguauagucagacauauu	92 +/- 5%	11	11	0	0	yes	hsa-miR-654-3p:MIMAT0004814
chr5:120882665..120882724:-	6.9	aaacuucuggucgcauaggau	uccuaugggaccagaaguuuc	aaacuucuggucgcauaggauuugaaaacccauuuacauccuaugggaccagaaguuuc	92 +/- 5%	11	10	0	1	yes	-
chr13:62933910..62933968:+	6.7	aaaaaccguaguuacuuuugc	aaaaguaauugcgguuuu	aaaaguaauugcgguuuuagccauuaaaaggaaugggaaaaaccguaguuacuuuugc	92 +/- 5%	11	9	0	2	yes	-
chr15:106899507..106899566:-	5.9	uuccugcugaacugagccag	ugauaucagcucaguaggcaccg	uuccugcugaacugagccaguguguaaaaugagaacugauaucagcucaguaggcaccg	92 +/- 5%	10	8	0	2	yes	-
chr2:189095822..189095879:+	5.1	uuaggagccaugcagcuggagg	ucccuacacggcuccuaaga	uuaggagccaugcagcuggaggacacgauucugaaccucccuacacggcuccuaaga	92 +/- 5%	9	8	0	1	yes	-
chr2:188563826..188563884:-	6.2	uuaguggcugccauauuggaua	uccaauaugguagccgcuggcc	uuaguggcugccauauuggauaguagagcugcacuauccaauaugguagccgcuggcc	92 +/- 5%	9	8	0	1	yes	-
chr6:140789268..140789336:+	5.5	uaagguagauggucuucuugugg	cacaagaagaccgucuaucu	uaagguagauggucuucuuguggaagaccacaaaagguuaaauauuugcacaagaagaccgucuaucu	92 +/- 5%	8	7	0	1	yes	-
chr7:20273425..20273492:+	5.2	ccccagagcucggcugcugcc	gcugcagccaaguucugggaga	ccccagagcucggcugcugccugcucaaagcuguggaucucaugggcugcagccaaguucugggaga	92 +/- 5%	8	7	0	1	yes	-
chr7:20273425..20273492:+	5.7	gcugcagccaaguucugggaga	ccccagagcucggcugcugcc	ccccagagcucggcugcugccugcucaaagcuguggaucucaugggcugcagccaaguucugggaga	92 +/- 5%	2	1	0	1	yes	hsa-miR-1184:MIMAT0005829
chr9:103084714..103084773:-	5.1	ucgaccggaccucgaccggc	cucggcguggcgucggucg	ucgaccggaccucgaccggcucgucuguguugccaaucgacucggcguggcgucggucg	92 +/- 4%	1535	1423	0	112	yes	hsa-miR-1307-5p:MIMAT0022727
chr2:174977471..174977532:-	5.5	aaaaguaauugugguuuuugc	aaccgcgauuacucuugcacga	aaaaguaauugugguuuuugcauuuaaaguaauggccaaaaccgcgauuacucuugcacga	92 +/- 4%	317	316	0	1	yes	hsa-miR-559:MIMAT0003223
chr5:95158258..95158318:-	5	agaaguaacugugguuuuugc	aaaaaccacaauuacuugugc	agaaguaacugugguuuuugcaacaccuaaaaaaauagcaaaaaccacaauuacuugugc	92 +/- 4%	289	289	0	0	yes	hsa-miR-548ao-5p:MIMAT0021029
chr13:26638811..26638859:-	5.3	acugggcuuggagucagaagac	cuucccacucugacucugaugc	acugggcuuggagucagaagacccagcuucccacucugacucugaugc	92 +/- 4%	37	37	0	0	yes	hsa-miR-378g:MIMAT0018937
chr1:213763516..213763573:-	5.1	ucugugagaccaaagaacuac	uguucuuuggucuuucagcca	uguucuuuggucuuucagccaugaccugaccuucugucugugagaccaaagaacuac	92 +/- 4%	34	34	0	0	yes	hsa-miR-4677-3p:MIMAT0019761
chr2:39064942..39065002:-	5.9	uaugucugacuauacaaagcc	cuuuguauagucagacauauu	uaugucugacuauacaaagccuauguaaaaguucaugggcuuuguauagucagacauauu	92 +/- 4%	28	28	0	0	yes	hsa-miR-654-3p:MIMAT0004814
chr9:125976485..125976543:-	5.2	uugggugacauuuguagauguc	uuuacacgugucgcucgggacg	uugggugacauuuguagaugucucuguaucuugacauuuacacgugucgcucgggacg	92 +/- 4%	20	18	0	2	yes	hsa-miR-1262:MIMAT0005914
chr18:51716515..51716573:-	5.2	uuuagugugauaauggcguu	caccauugucacacuccaca	uuuagugugauaauggcguuugauaguuuagacacaaacaccauugucacacuccaca	92 +/- 4%	14	14	0	0	yes	hsa-miR-3591-5p:MIMAT0019876
chr15:1147236..1147297:-	5.6	ugcugucccuccagagccguggc	caggcucuugugaggacagugc	ugcugucccuccagagccguggcugacagccaggucuggcaggcucuugugaggacagugc	92 +/- 4%	9	8	0	1	yes	-
chr8:1902655..1902719:+	5.4	uggccccagugucgugaucuc	ugucaugauaucuguguggccccac	ugucaugauaucuguguggccccacaguguuaugaugucugcguggccccagugucgugaucuc	92 +/- 4%	9	7	0	2	yes	-
chr13:26794690..26794747:+	5	agaaguaauugcuguuuuugc	caaaaacugcagugacuucug	agaaguaauugcuguuuuugccauuacuuuuaaagacaaaaacugcagugacuucug	92 +/- 4%	8	6	0	2	yes	-
chr11:123662408..123662476:+	5	uaagcaccugaagucagaauac	guauucugacuucaggugcuuag	uaagcaccugaagucagaauaccugaguucacacgcugguuaaagguauucugacuucaggugcuuag	92 +/- 4%	7	3	0	4	yes	-
chr2:40118462..40118523:-	233.3	gagagaucagaggcgcagag	ccugugccuuuuaccucuuuaa	gagagaucagaggcgcagagugcgucaaugucaaugaagccugugccuuuuaccucuuuaa	91 +/- 7%	458	450	0	8	yes	-
chr18:6923491..6923554:+	191.6	aggagugacagaguuagacuc	agucucgcucugucagucaggc	aggagugacagaguuagacucuuuuuuuuuuuuugagacagagucucgcucugucagucaggc	91 +/- 7%	373	372	0	1	yes	-
chr16:11829814..11829892:+	159.8	ugcggggcuagggcuaacagc	cuguugccacuaaccucaacc	ugcggggcuagggcuaacagcagucuuacugaagguuuccuggaaaccacgcacaugcuguugccacuaaccucaacc	91 +/- 7%	305	300	0	5	yes	hsa-miR-744-5p:MIMAT0004945
chr3:189815411..189815469:+	112.7	aaaaguaauugugguuuuugc	caaaacccgcaguuacuuuugc	aaaaguaauugugguuuuugcaauuaugcuuaguggcaaaacccgcaguuacuuuugc	91 +/- 7%	219	196	0	23	yes	-
chr12:42369965..42370028:-	77	uauguccuuuguaaacaaauaaca	uuuugcuguuugcauuggacag	uauguccuuuguaaacaaauaacaagaaauuaauggauguguuuugcuguuugcauuggacag	91 +/- 7%	172	83	0	89	yes	-
chr15:24915238..24915296:+	70.8	cuuagacugccaggcucccuga	agggagucuggcagucuaagug	cuuagacugccaggcucccugagaacaugcaguuucagggagucuggcagucuaagug	91 +/- 7%	136	129	0	7	yes	-
chr1:212022327..212022385:-	53.1	uguggccucuggguguguacccu	aguguacuuccugaggcc	aguguacuuccugaggccucuggguauaaaauuccuguggccucuggguguguacccu	91 +/- 7%	102	72	0	30	yes	-
chr10:84714589..84714645:-	26.7	acagcaaucgcucuuuuggaag	ucugaaagagcaguugguguu	ucugaaagagcaguugguguuuauuuuuuacuaaacagcaaucgcucuuuuggaag	91 +/- 7%	51	40	0	11	yes	-
chr10:80239560..80239621:-	22.5	aaaaguaaucgcgguuuuugc	aaagacugugaugacuuuugcacc	aaaaguaaucgcgguuuuugccauuaaaaguaauggcaaagacugugaugacuuuugcacc	91 +/- 7%	35	34	0	1	yes	hsa-miR-559:MIMAT0003223
chr20:87818411..87818469:+	22.3	ucucaggaugccgcugcacg	gguguggcugugugcugaggguc	gguguggcugugugcugagggucuguggucccugcgacucucaggaugccgcugcacg	91 +/- 7%	34	24	0	10	yes	hsa-miR-3664-3p:MIMAT0019220
chr14:70119266..70119323:-	21.9	aaaaacugcaguuacuugugc	aaaguaauugcaguuguu	aaaguaauugcaguuguugcuguugaaaguaauggcaaaaacugcaguuacuugugc	91 +/- 7%	34	20	0	14	yes	hsa-miR-548a-3p:MIMAT0003251
chr13:62933910..62933968:+	18	aaaaaccguaguuacuuuugc	aaaaguaauugcgguuuu	aaaaguaauugcgguuuuagccauuaaaaggaaugggaaaaaccguaguuacuuuugc	91 +/- 7%	33	15	0	18	yes	-
chr16:59542464..59542528:-	14.1	acuggacugugaaaccaggcacc	ugcuugaaggucacaguccaccuc	acuggacugugaaaccaggcacccccaccuagcccauaggugcuugaaggucacaguccaccuc	91 +/- 7%	21	20	0	1	yes	hsa-miR-378a-3p:MIMAT0000732
chr2:189418374..189418433:+	10.2	uuaggagccaugcagcuggaggc	ucccuacacggcuccuaaga	uuaggagccaugcagcuggaggcuacaugagucugacccucccuacacggcuccuaaga	91 +/- 7%	19	18	0	1	yes	-
chr14:109970184..109970240:-	12.7	uggcaguggaguuagugauug	aucagcuaaugacacugcc	uggcaguggaguuagugauuguaaccaccacaguacaaucagcuaaugacacugcc	91 +/- 7%	16	15	0	1	yes	hsa-miR-34a-5p:MIMAT0000255
chr9:103084714..103084773:-	5.1	ucgaccggaccucgaccggc	cucggcguggcgucggucg	ucgaccggaccucgaccggcucgucuguguugccaaucgacucggcguggcgucggucg	91 +/- 5%	780	725	0	55	yes	hsa-miR-1307-5p:MIMAT0022727
chr10:84714591..84714645:-	5.1	ucugaaagagcaguugguguu	aacagcaaucgcucuuuugga	ucugaaagagcaguugguguuuauuuuuuacuaaacagcaaucgcucuuuugga	91 +/- 5%	33	24	0	9	yes	hsa-miR-4766-5p:MIMAT0019917
chr13:26638811..26638859:-	5.3	acugggcuuggagucagaagac	cuucccacucugacucugaugc	acugggcuuggagucagaagacccagcuucccacucugacucugaugc	91 +/- 5%	29	29	0	0	yes	hsa-miR-378g:MIMAT0018937
chr14:109970181..109970240:-	5.3	uggcaguggaguuagugauug	aucagcuaaugacacugccuac	uggcaguggaguuagugauuguaaccaccacaguacaaucagcuaaugacacugccuac	91 +/- 5%	14	14	0	0	yes	hsa-miR-34a-5p:MIMAT0000255
chr18:51716515..51716573:-	5.2	uuuagugugauaauggcguu	caccauugucacacuccaca	uuuagugugauaauggcguuugauaguuuagacacaaacaccauugucacacuccaca	91 +/- 5%	14	14	0	0	yes	hsa-miR-3591-5p:MIMAT0019876
chr1:213763516..213763573:-	5.1	ucugugagaccaaagaacuac	uguucuuuggucuuucagcca	uguucuuuggucuuucagccaugaccugaccuucugucugugagaccaaagaacuac	91 +/- 5%	12	12	0	0	yes	hsa-miR-4677-3p:MIMAT0019761
chr7:119843137..119843195:-	5	caaaaacugcaacuacuuuugc	aaaagaaauugcaauuuuugcc	aaaagaaauugcaauuuuugccauuaaaaguaaugacaaaaacugcaacuacuuuugc	91 +/- 5%	12	12	0	0	yes	hsa-miR-548x-3p:MIMAT0015081
chr2:39064942..39065002:-	5.6	uaugucugacuauacaaagcc	cuuuguauagucagacauauu	uaugucugacuauacaaagccuauguaaaaguucaugggcuuuguauagucagacauauu	91 +/- 5%	11	11	0	0	yes	hsa-miR-654-3p:MIMAT0004814
chr9:64236493..64236550:-	5.5	agagccaguggugagacaguga	cacuguuucaccacuggcucuu	agagccaguggugagacagugaguugauuacuucucacuguuucaccacuggcucuu	91 +/- 5%	8	5	0	3	yes	-
chr12:13829209..13829286:+	5.6	cacuguaggggguguguccccc	ggaagcaucgucauaauagugg	ggaagcaucgucauaauaguggugaaucauguugauguagguaacuggggcauuucacuguaggggguguguccccc	91 +/- 5%	4	3	0	1	yes	hsa-miR-1183:MIMAT0005828
chr13:101252003..101252086:+	5.7	gucauuuagguagucugaugc	ucagauuaccuaaaugaacacc	gucauuuagguagucugaugccugcuacugaugacauacaacguaagugcucauuugggcaucagauuaccuaaaugaacacc	91 +/- 5%	2	1	0	1	yes	hsa-miR-5696:MIMAT0022489
chr3:100688605..100688663:+	9.5	aaaaguaauugcgguuuuugc	ccaaaaucgcgauuacuuuugc	aaaaguaauugcgguuuuugccauggaaagcaauggccaaaaucgcgauuacuuuugc	90 +/- 7%	17	14	0	3	yes	-
chr17:75978336..75978394:-	9.1	caaacacugcaguuacuuuugc	aaaaguaauugcaguuuu	aaaaguaauugcaguuuuugcuauuaaaaguaaugacaaacacugcaguuacuuuugc	90 +/- 7%	16	8	0	8	yes	-
chr12:90414201..90414262:+	8.7	caaaaguaauuccaguuuuugc	aaacugcaguuacuuuugcacca	caaaaguaauuccaguuuuugccauugaaagugauacaaaacugcaguuacuuuugcacca	90 +/- 7%	16	9	0	7	yes	-
chr2:128798640..128798697:-	9.3	caaaaacuacaauuacuuuugc	caaagguaauuucaguuuuug	caaagguaauuucaguuuuugucuaauuuuaauggcaaaaacuacaauuacuuuugc	90 +/- 7%	9	7	0	2	yes	hsa-miR-548x-3p:MIMAT0015081
chr13:75089548..75089609:+	8	uccugggcuuuggcagacagc	uguugagcugagcccagggug	uccugggcuuuggcagacagcucuuugccucucauacagcuguugagcugagcccagggug	90 +/- 7%	6	5	0	1	yes	hsa-miR-939-3p:MIMAT0022939
chr9:103084714..103084773:-	5.1	ucgaccggaccucgaccggc	cucggcguggcgucggucg	ucgaccggaccucgaccggcucgucuguguugccaaucgacucggcguggcgucggucg	90 +/- 6%	953	874	0	79	yes	hsa-miR-1307-5p:MIMAT0022727
chr13:26638811..26638859:-	5.3	acugggcuuggagucagaagac	cuucccacucugacucugaugc	acugggcuuggagucagaagacccagcuucccacucugacucugaugc	90 +/- 6%	64	64	0	0	yes	hsa-miR-378g:MIMAT0018937
chr9:125976485..125976543:-	5.2	uugggugacauuuguagauguc	uuuacacgugucgcucgggacg	uugggugacauuuguagaugucucuguaucuugacauuuacacgugucgcucgggacg	90 +/- 6%	31	28	0	3	yes	hsa-miR-1262:MIMAT0005914
chr1:213763516..213763573:-	5.1	ucugugagaccaaagaacuac	uguucuuuggucuuucagcca	uguucuuuggucuuucagccaugaccugaccuucugucugugagaccaaagaacuac	90 +/- 6%	30	30	0	0	yes	hsa-miR-4677-3p:MIMAT0019761
chr18:51716515..51716573:-	5.2	uuuagugugauaauggcguu	caccauugucacacuccaca	uuuagugugauaauggcguuugauaguuuagacacaaacaccauugucacacuccaca	90 +/- 6%	20	20	0	0	yes	hsa-miR-3591-5p:MIMAT0019876
chr1:199922779..199922824:+	5	uuucugucuauugaugag	ugaacaggagacaggaagug	ugaacaggagacaggaaguggcagucauuucugucuauugaugag	90 +/- 6%	16	16	0	0	yes	hsa-miR-4743-3p:MIMAT0022978
chr11:105706126..105706186:+	5.8	ugugggaccucuggccuuggc	caaggccacagguccuacaac	caaggccacagguccuacaacagggcuggaaagcacaccugugggaccucuggccuuggc	90 +/- 6%	12	12	0	0	yes	hsa-miR-4648:MIMAT0019710
chr2:39064942..39065002:-	5.6	uaugucugacuauacaaagcc	cuuuguauagucagacauauu	uaugucugacuauacaaagccuauguaaaaguucaugggcuuuguauagucagacauauu	90 +/- 6%	11	11	0	0	yes	hsa-miR-654-3p:MIMAT0004814
chr19:55429831..55429885:-	5.8	caagucagccugggucacugc	aaguggccugggcugguguggg	aaguggccugggcugguguggguguggagaaaccaagucagccugggucacugc	90 +/- 6%	9	8	0	1	yes	-
chr3:9554566..9554624:+	5.2	caaaaucgucuaugacuuuugc	aaaggucauugcagauuuugcc	aaaggucauugcagauuuugccauuacuuuuaguggcaaaaucgucuaugacuuuugc	90 +/- 6%	8	5	0	3	yes	-
chr10:29091320..29091386:+	8.2	ugcagacucuuggauuccaccc	uggaguccaggaaucugcauu	ugcagacucuuggauuccacccccagagaauccguaaaccggggguggaguccaggaaucugcauu	89 +/- 9%	14	13	0	1	yes	-
chr15:24915238..24915294:+	356.3	cuuagacugccaggcucccuga	agggagucuggcagucuaag	cuuagacugccaggcucccugagaacaugcaguuucagggagucuggcagucuaag	89 +/- 8%	696	687	0	9	yes	-
chr18:6923491..6923554:+	320.6	aggagugacagaguuagacuc	agucucgcucugucagucaggc	aggagugacagaguuagacucuuuuuuuuuuuuugagacagagucucgcucugucagucaggc	89 +/- 8%	626	620	2	4	yes	-
chr2:40118462..40118523:-	273.1	gagagaucagaggcgcagag	ccugugccuuuuaccucuuuaa	gagagaucagaggcgcagagugcgucaaugucaaugaagccugugccuuuuaccucuuuaa	89 +/- 8%	536	528	0	8	yes	-
chr6:85254273..85254330:+	184.1	aaaaggaauugcgguuuuugaca	caaaaaccgcaguuacuuuugc	aaaaggaauugcgguuuuugacauuacuuuaaagucaaaaaccgcaguuacuuuugc	89 +/- 8%	359	315	0	44	yes	-
chr3:189815411..189815469:+	166.8	aaaaguaauugugguuuuugc	caaaacccgcaguuacuuuugc	aaaaguaauugugguuuuugcaauuaugcuuaguggcaaaacccgcaguuacuuuugc	89 +/- 8%	325	317	0	8	yes	-
chr16:11829814..11829892:+	114.4	ugcggggcuagggcuaacagc	cuguugccacuaaccucaacc	ugcggggcuagggcuaacagcagucuuacugaagguuuccuggaaaccacgcacaugcuguugccacuaaccucaacc	89 +/- 8%	216	211	0	5	yes	hsa-miR-744-5p:MIMAT0004945
chr19:59640352..59640412:+	55.2	cgucaauuacguuugcacuga	uggugcaaaaguaauuggggu	uggugcaaaaguaauugggguuuuugccauuaccuuuaacgucaauuacguuugcacuga	89 +/- 8%	108	106	0	2	yes	-
chr1:180297397..180297466:+	47.3	aaaaguaaucgcgguuuuugc	cacgaaccgcaguuacuuuuga	aaaaguaaucgcgguuuuugccauuacuuuuaauuguuuugcuuuugcacgaaccgcaguuacuuuuga	89 +/- 8%	91	87	0	4	yes	-
chr17:28813574..28813632:-	44.3	uguuguacuuuuuuuuuuguuc	acaaaaaaaaaagcccaaccc	uguuguacuuuuuuuuuuguucguugcauuuuuaggaacaaaaaaaaaagcccaaccc	89 +/- 8%	80	76	0	4	yes	hsa-miR-3613-5p:MIMAT0017990
chr10:84714589..84714645:-	35.9	ucugaaagagcaguugguguu	acagcaaucgcucuuuuggaag	ucugaaagagcaguugguguuuauuuuuuacuaaacagcaaucgcucuuuuggaag	89 +/- 8%	62	31	0	31	yes	hsa-miR-4766-5p:MIMAT0019917
chr1:212022328..212022385:-	30.5	uggccucuggguguguaccc	aguguacuuccugaggcc	aguguacuuccugaggccucuggguauaaaauuccuguggccucuggguguguaccc	89 +/- 8%	51	38	0	13	yes	hsa-miR-4757-5p:MIMAT0019901
chr2:139320934..139320997:-	27.4	caaaaaccgcaguuacuuuugc	aacaguaauugugguuuuugcc	aacaguaauugugguuuuugccuuuaaaaaaaaaaaaaagucaaaaaccgcaguuacuuuugc	89 +/- 8%	45	44	0	1	yes	hsa-miR-548d-3p:MIMAT0003323
chr10:84006376..84006433:+	16.7	acgauaacacccaaguccgaa	uuggacuuuggugcuaccaua	uuggacuuuggugcuaccauaaaggaauauauacuuacgauaacacccaaguccgaa	89 +/- 8%	32	23	0	9	yes	-
chr11:43532170..43532228:+	16.5	aaaagaagugaaauuaggauc	auccuaauuucauuucuuuugg	auccuaauuucauuucuuuuggcaaaaauacucaaccaaaagaagugaaauuaggauc	89 +/- 8%	30	29	0	1	yes	-
chr14:109970184..109970240:-	18.8	uggcaguggaguuagugauug	aaucagcuaaugacacugcc	uggcaguggaguuagugauuguaaccaccacaguacaaucagcuaaugacacugcc	89 +/- 8%	28	27	0	1	yes	hsa-miR-34a-5p:MIMAT0000255
chr12:41976864..41976921:+	15.4	ugugcagaacucauagaaggc	uucugugaguccuaugcagaac	uucugugaguccuaugcagaacucauaggggugcucugugcagaacucauagaaggc	89 +/- 8%	28	23	0	5	yes	-
chr20:87818413..87818469:+	17.3	ucucaggaugccgcugcacg	uguggcugugugcugaggguc	uguggcugugugcugagggucuguggucccugcgacucucaggaugccgcugcacg	89 +/- 8%	24	19	0	5	yes	hsa-miR-3664-3p:MIMAT0019220
chr12:91013999..91014057:-	15.7	aaaaguaauuguggucuuugcc	caaaaaccacaauuacuuuug	aaaaguaauuguggucuuugccguugcuuuuaaaaggcaaaaaccacaauuacuuuug	89 +/- 8%	22	10	0	12	yes	hsa-miR-559:MIMAT0003223
chr7:99154942..99154997:+	10.7	aagugacuguaguuuuugcca	caaaaaccacaauuacuuuug	aagugacuguaguuuuugccauuacucucaacggcaaaaaccacaauuacuuuug	89 +/- 8%	20	11	0	9	yes	-
chr5:172858268..172858327:-	13.2	aaaaacugcaguuacuuuugc	aaaaguaauugcaguucu	aaaaguaauugcaguucuucucaucauuuuuaauggcaaaaaacugcaguuacuuuugc	89 +/- 8%	17	16	0	1	yes	hsa-miR-548a-3p:MIMAT0003251
chr19:55429831..55429885:-	8.8	caagucagccugggucacugc	aaguggccugggcuggugu	aaguggccugggcugguguggguguggagaaaccaagucagccugggucacugc	89 +/- 8%	15	14	0	1	yes	-
chr3:9554566..9554624:+	8.7	caaaaucgucuaugacuuuugc	aaaggucauugcagauuuugcc	aaaggucauugcagauuuugccauuacuuuuaguggcaaaaucgucuaugacuuuugc	89 +/- 8%	15	14	0	1	yes	-
chr5:151294975..151295036:+	6.7	uauggaaagacuuugucac	agcaaagucuuuccauaugug	agcaaagucuuuccauauguguaauagacacacauacauacauauggaaagacuuugucac	89 +/- 8%	4	2	0	2	yes	hsa-miR-3688-3p:MIMAT0018116
chr11:66573298..66573356:-	7.5	uuugggacugaucuugacacuc	acaucaagaucagucccaaa	uuugggacugaucuugacacucuuacauguuuuggcagacaucaagaucagucccaaa	89 +/- 7%	5	4	0	1	yes	hsa-miR-3122:MIMAT0014984
chr4:157077308..157077379:+	6.8	uuggggaagaggugcgggaacgu	uucucccgccucugcuccccag	uuggggaagaggugcgggaacgugcccuggugcaggccuuggucugacguucucccgccucugcuccccag	89 +/- 7%	4	3	0	1	yes	hsa-miR-2110:MIMAT0010133
chr8:109369882..109369940:+	7.8	caagaacugcaauuacuuuugc	aaaaguaaucacgguuuuuugcc	aaaaguaaucacgguuuuuugccaucaaggaaaugacaagaacugcaauuacuuuugc	88 +/- 7%	14	13	0	1	yes	-
chr6:167769227..167769281:-	7.3	uaacgcauaauauggauaugu	uauccauaauaugcguuaguug	uauccauaauaugcguuaguuguggacacauacuaacgcauaauauggauaugu	88 +/- 7%	5	4	0	1	yes	hsa-miR-3912:MIMAT0018186
chr17:28813574..28813632:-	4.4	uguuguacuuuuuuuuuugu	acaaaaaaaaaagcccaaccc	uguuguacuuuuuuuuuuguucguugcauuuuuaggaacaaaaaaaaaagcccaaccc	88 +/- 5%	100	90	0	10	yes	hsa-miR-3613-5p:MIMAT0017990
chr3:21758853..21758909:-	4.6	caaaaaccgcaguuacuuuugc	aaaaguaaugcaguuuugcc	aaaaguaaugcaguuuugccauuacuuuuaaugucaaaaaccgcaguuacuuuugc	88 +/- 5%	44	44	0	0	yes	hsa-miR-548d-3p:MIMAT0003323
chr20:87818449..87818510:+	4.4	ucucaggaugccgcugcacg	ugcugugugcgccaccuagauc	ucucaggaugccgcugcacgugccgccaccggcagccauugcugugugcgccaccuagauc	88 +/- 5%	24	24	0	0	yes	hsa-miR-3664-3p:MIMAT0019220
chr2:33609266..33609322:-	4.4	aaaaguaauugugauuuugc	aaaaaggcaauuacuuucac	aaaaguaauugugauuuugcuuucaaaaauaauggcaaaaaggcaauuacuuucac	88 +/- 5%	20	20	0	0	yes	hsa-miR-559:MIMAT0003223
chr10:88062438..88062494:-	4.4	aaaaguaauugugauuuugc	aaaaaggcaauuacuuucac	aaaaguaauugugauuuugcuuucaaaaauaauggcaaaaaggcaauuacuuucac	88 +/- 5%	20	20	0	0	yes	hsa-miR-559:MIMAT0003223
chr7:132931859..132931907:+	4.7	uaccuugcccugcccccc	gguggaaggaagccagcuauc	gguggaaggaagccagcuauccuaaaaggauaccuugcccugcccccc	88 +/- 5%	19	19	0	0	yes	hsa-miR-3200-3p:MIMAT0015085
chr9:67567377..67567444:-	4.8	ucccccagucuggccacagagcc	ccugcagcccugccuggggugug	ucccccagucuggccacagagccuuuaauauccagagaaucaggccugcagcccugccuggggugug	88 +/- 5%	17	17	0	0	yes	hsa-miR-361-3p:MIMAT0004682
chrX:62639455..62639519:-	4.5	cuccguuugccuguuuugcuga	agcaaaauaagcaaauggaaaa	cuccguuugccuguuuugcugauguacauucaacucauucucagcaaaauaagcaaauggaaaa	88 +/- 5%	14	14	0	0	yes	hsa-miR-1468:MIMAT0006789
chr12:13829208..13829286:+	4.3	cacuguaggggguguguccccc	gggaagcaucgucauaauaguggu	gggaagcaucgucauaauaguggugaaucauguugauguagguaacuggggcauuucacuguaggggguguguccccc	88 +/- 5%	14	14	0	0	yes	hsa-miR-1183:MIMAT0005828
chrX:62639455..62639519:-	4.5	cuccguuugccuguuuugcuga	agcaaaauaagcaaauggaaaa	cuccguuugccuguuuugcugauguacauucaacucauucucagcaaaauaagcaaauggaaaa	88 +/- 5%	12	12	0	0	yes	hsa-miR-1468:MIMAT0006789
chr3:56592609..56592661:-	4.2	aaaaguaauugugggcuuugc	aauggccgcaauuacuuuuac	aaaaguaauugugggcuuugccauuacuuuuaauggccgcaauuacuuuuac	88 +/- 5%	10	10	0	0	yes	hsa-miR-559:MIMAT0003223
chr9:64236494..64236550:-	4.5	cacuguuucaccacuggcucu	agagccaguggugagacaguga	agagccaguggugagacagugaguugauuacuucucacuguuucaccacuggcucu	88 +/- 5%	9	4	0	5	yes	hsa-miR-452-5p:MIMAT0001635
chr6:167769230..167769281:-	4.2	uaacgcauaauauggaua	uauccauaauaugcguuagu	uauccauaauaugcguuaguuguggacacauacuaacgcauaauauggaua	88 +/- 5%	9	5	0	4	yes	hsa-miR-3912:MIMAT0018186
chr4:127494813..127494867:+	4.4	uguggcacacaggacacggac	uccuugcucugcguggcaucug	uguggcacacaggacacggaccuucauggaaguccuugcucugcguggcaucug	88 +/- 5%	8	7	0	1	yes	-
chr6:7364661..7364728:+	4.1	acaggcuugcagaaugaaugc	cauucauucagcaagccug	acaggcuugcagaaugaaugcuucuucaggucgaagugccuuaacaagcauucauucagcaagccug	88 +/- 5%	6	5	0	1	yes	-
chr6:85262494..85262557:+	4	auucuauaugaaauaagucac	ugucuuauauuauauagaa	ugucuuauauuauauagaaugauauauaauauuucuauaaucauucuauaugaaauaagucac	88 +/- 5%	6	5	0	1	yes	-
chr10:14947278..14947341:-	4.3	acgugggugggaacugggcaucca	augcccaggugccaaccccaga	augcccaggugccaaccccagauugaucaugucaaaaucacgugggugggaacugggcaucca	88 +/- 5%	6	4	0	2	yes	-
chr12:23738631..23738692:-	4	acuagauuuagggauugacac	gucaauucccaaaucuaguga	acuagauuuagggauugacacuggagcacuuggacagugugucaauucccaaaucuaguga	88 +/- 5%	6	5	0	1	yes	-
chr2:40118463..40118523:-	371	gagagaucagaggcgcagag	ccugugccuuuuaccucuuua	gagagaucagaggcgcagagugcgucaaugucaaugaagccugugccuuuuaccucuuua	87 +/- 9%	728	720	0	8	yes	-
chr3:189815411..189815469:+	221.3	aaaaguaauugugguuuuugc	caaaacccgcaguuacuuuugc	aaaaguaauugugguuuuugcaauuaugcuuaguggcaaaacccgcaguuacuuuugc	87 +/- 9%	432	424	0	8	yes	-
chr2:174977475..174977532:-	222.7	aaaaguaauugugguuuuugc	ccaaaaccgcgauuacucuugc	aaaaguaauugugguuuuugcauuuaaaguaauggccaaaaccgcgauuacucuugc	87 +/- 9%	428	424	0	4	yes	hsa-miR-559:MIMAT0003223
chr3:176724102..176724152:-	177.5	cugugguuccuguaugaagaca	ucuucaugcaggaaccaca	cugugguuccuguaugaagacaguagcggugucuucaugcaggaaccaca	87 +/- 9%	346	345	0	1	yes	-
chr16:11829814..11829892:+	166.8	ugcggggcuagggcuaacagc	cuguugccacuaaccucaacc	ugcggggcuagggcuaacagcagucuuacugaagguuuccuggaaaccacgcacaugcuguugccacuaaccucaacc	87 +/- 9%	319	316	0	3	yes	hsa-miR-744-5p:MIMAT0004945
chr15:24915238..24915296:+	119.7	cuuagacugccaggcucccuga	agggagucuggcagucuaagug	cuuagacugccaggcucccugagaacaugcaguuucagggagucuggcagucuaagug	87 +/- 9%	232	223	0	9	yes	-
chr18:6923491..6923554:+	71.3	aggagugacagaguuagacuc	agucucgcucugucagucaggc	aggagugacagaguuagacucuuuuuuuuuuuuugagacagagucucgcucugucagucaggc	87 +/- 9%	137	135	0	2	yes	-
chr10:84714589..84714645:-	63	ucugaaagagcaguugguguu	acagcaaucgcucuuuuggaag	ucugaaagagcaguugguguuuauuuuuuacuaaacagcaaucgcucuuuuggaag	87 +/- 9%	115	74	0	41	yes	hsa-miR-4766-5p:MIMAT0019917
chr1:180297397..180297466:+	34.2	aaaaguaaucgcgguuuuugc	cacgaaccgcaguuacuuuuga	aaaaguaaucgcgguuuuugccauuacuuuuaauuguuuugcuuuugcacgaaccgcaguuacuuuuga	87 +/- 9%	65	64	0	1	yes	-
chr12:41976864..41976921:+	21	ugugcagaacucauagaaggc	uucugugaguccuaugcagaac	uucugugaguccuaugcagaacucauaggggugcucugugcagaacucauagaaggc	87 +/- 9%	39	34	0	5	yes	-
chr20:87818411..87818469:+	23.9	ucucaggaugccgcugcacg	gguguggcugugugcugaggguc	gguguggcugugugcugagggucuguggucccugcgacucucaggaugccgcugcacg	87 +/- 9%	37	26	0	11	yes	hsa-miR-3664-3p:MIMAT0019220
chr2:189418374..189418434:+	16.8	uuaggagccaugcagcuggagg	ucccuacacggcuccuaagau	uuaggagccaugcagcuggaggcuacaugagucugacccucccuacacggcuccuaagau	87 +/- 9%	33	31	0	2	yes	-
chr2:189095822..189095880:+	14.3	uuaggagccaugcagcuggagg	ucccuacacggcuccuaagau	uuaggagccaugcagcuggaggacacgauucugaaccucccuacacggcuccuaagau	87 +/- 9%	27	25	0	2	yes	-
chr10:84006376..84006433:+	12.1	acgauaacacccaaguccgaa	uuggacuuuggugcuaccaua	uuggacuuuggugcuaccauaaaggaauauauacuuacgauaacacccaaguccgaa	87 +/- 9%	23	19	0	4	yes	-
chr1:213763516..213763574:-	14.5	ucugugagaccaaagaacuac	uuguucuuuggucuuucag	uuguucuuuggucuuucagccaugaccugaccuucugucugugagaccaaagaacuac	87 +/- 9%	20	19	0	1	yes	hsa-miR-4677-3p:MIMAT0019761
chr13:62933910..62933968:+	10.8	aaaaaccguaguuacuuuugc	aaaaguaauugcgguuuu	aaaaguaauugcgguuuuagccauuaaaaggaaugggaaaaaccguaguuacuuuugc	87 +/- 9%	19	5	0	14	yes	-
chr12:91013999..91014057:-	13.7	aaaaguaauuguggucuuugcc	caaaaaccacaauuacuuuug	aaaaguaauuguggucuuugccguugcuuuuaaaaggcaaaaaccacaauuacuuuug	87 +/- 9%	18	10	0	8	yes	hsa-miR-559:MIMAT0003223
chr12:71858145..71858199:-	13.3	aaaaguaauugugguucuugcc	caaaagccgcaauaacuu	aaaaguaauugugguucuugcccuuacuuuuaauggcaaaagccgcaauaacuu	87 +/- 9%	17	16	0	1	yes	hsa-miR-559:MIMAT0003223
chr13:62933910..62933968:+	8.3	aaaaaccguaguuacuuuugc	aaaaguaauugcgguuuu	aaaaguaauugcgguuuuagccauuaaaaggaaugggaaaaaccguaguuacuuuugc	87 +/- 8%	14	8	0	6	yes	-
chr17:28813574..28813632:-	4.4	uguuguacuuuuuuuuuugu	acaaaaaaaaaagcccaaccc	uguuguacuuuuuuuuuuguucguugcauuuuuaggaacaaaaaaaaaagcccaaccc	87 +/- 6%	93	74	0	19	yes	hsa-miR-3613-5p:MIMAT0017990
chrX:62639455..62639519:-	4.5	cuccguuugccuguuuugcuga	agcaaaauaagcaaauggaaaa	cuccguuugccuguuuugcugauguacauucaacucauucucagcaaaauaagcaaauggaaaa	87 +/- 6%	29	29	0	0	yes	hsa-miR-1468:MIMAT0006789
chr17:90323138..90323199:-	4.6	aggacugcuggaggaccgcag	cuggggcccugggcagaccucc	aggacugcuggaggaccgcagagaaaugagccuacuccucuggggcccugggcagaccucc	87 +/- 6%	10	9	0	1	yes	hsa-miR-1288:MIMAT0005942
chr14:43728075..43728133:+	4.9	agcaggucacauuuguuggac	uccuacaaaugugaccugcu	uccuacaaaugugaccugcuuugcugaguuugaccagagcaggucacauuuguuggac	87 +/- 6%	7	6	0	1	yes	-
chr1:81985878..81985936:+	4.5	auccacauaugauaaaacuc	aguuuuaucauacaugga	aguuuuaucauacauggauaauuugcauuaugaguuuuauccacauaugauaaaacuc	87 +/- 6%	7	5	0	2	yes	-
chr9:64236493..64236550:-	4	agagccaguggugagacaguga	cacuguuucaccacuggcucuu	agagccaguggugagacagugaguugauuacuucucacuguuucaccacuggcucuu	87 +/- 6%	5	3	0	2	yes	-
chr2:40118462..40118523:-	201.7	gagagaucagaggcgcagag	ccugugccuuuuaccucuuuaa	gagagaucagaggcgcagagugcgucaaugucaaugaagccugugccuuuuaccucuuuaa	87 +/- 11%	396	389	0	7	yes	-
chr18:6923491..6923553:+	191.6	aggagugacagaguuagacuc	agucucgcucugucagucagg	aggagugacagaguuagacucuuuuuuuuuuuuugagacagagucucgcucugucagucagg	87 +/- 11%	373	372	0	1	yes	-
chr16:11829814..11829892:+	99.6	ugcggggcuagggcuaacagc	cuguugccacuaaccucaacc	ugcggggcuagggcuaacagcagucuuacugaagguuuccuggaaaccacgcacaugcuguugccacuaaccucaacc	87 +/- 11%	187	180	0	7	yes	hsa-miR-744-5p:MIMAT0004945
chr1:212022327..212022385:-	45.4	uguggccucuggguguguacccu	aguguacuuccugaggcc	aguguacuuccugaggccucuggguauaaaauuccuguggccucuggguguguacccu	87 +/- 11%	87	66	0	21	yes	-
chr10:84714589..84714645:-	25.2	acagcaaucgcucuuuuggaag	ucugaaagagcaguugguguu	ucugaaagagcaguugguguuuauuuuuuacuaaacagcaaucgcucuuuuggaag	87 +/- 11%	48	30	0	18	yes	-
chr13:62933910..62933968:+	15.9	aaaaaccguaguuacuuuugc	aaaaguaauugcgguuuu	aaaaguaauugcgguuuuagccauuaaaaggaaugggaaaaaccguaguuacuuuugc	87 +/- 11%	29	13	0	16	yes	-
chr20:87818413..87818469:+	15.7	ucucaggaugccgcugcacg	uguggcugugugcugaggguc	uguggcugugugcugagggucuguggucccugcgacucucaggaugccgcugcacg	87 +/- 11%	21	15	0	6	yes	hsa-miR-3664-3p:MIMAT0019220
chr3:176527467..176527525:-	13.4	aauuacagauugucucagaga	ucucggacaagcuguagguc	aauuacagauugucucagagaaaacagaugaguuacucucucggacaagcuguagguc	87 +/- 11%	19	10	0	9	yes	hsa-miR-6504-3p:MIMAT0025465
chr4:110159736..110159794:-	11.6	aaaaguaauugugggcuuugc	aaaaaccgcaauuacuuuugc	aaaaguaauugugggcuuugcuauagaaaguaaagguaaaaaccgcaauuacuuuugc	87 +/- 11%	14	6	0	8	yes	hsa-miR-559:MIMAT0003223
chr12:41976864..41976921:+	9.2	ugugcagaacucauagaaggc	uucugugaguccuaugcagaac	uucugugaguccuaugcagaacucauaggggugcucugugcagaacucauagaaggc	87 +/- 10%	16	12	0	4	yes	-
chr2:40118462..40118523:-	132.4	gagagaucagaggcgcagag	ccugugccuuuuaccucuuuaa	gagagaucagaggcgcagagugcgucaaugucaaugaagccugugccuuuuaccucuuuaa	86 +/- 9%	260	249	0	11	yes	-
chr16:11829814..11829892:+	79.7	ugcggggcuagggcuaacagc	cuguugccacuaaccucaacc	ugcggggcuagggcuaacagcagucuuacugaagguuuccuggaaaccacgcacaugcuguugccacuaaccucaacc	86 +/- 9%	148	146	0	2	yes	hsa-miR-744-5p:MIMAT0004945
chr18:6923491..6923554:+	59	aggagugacagaguuagacuc	agucucgcucugucagucaggc	aggagugacagaguuagacucuuuuuuuuuuuuugagacagagucucgcucugucagucaggc	86 +/- 9%	113	112	0	1	yes	-
chr17:28813574..28813632:-	48.4	uguuguacuuuuuuuuuuguuc	acaaaaaaaaaagcccaaccc	uguuguacuuuuuuuuuuguucguugcauuuuuaggaacaaaaaaaaaagcccaaccc	86 +/- 9%	88	80	0	8	yes	hsa-miR-3613-5p:MIMAT0017990
chr15:24915238..24915294:+	44.8	cuuagacugccaggcucccuga	agggagucuggcagucuaag	cuuagacugccaggcucccugagaacaugcaguuucagggagucuggcagucuaag	86 +/- 9%	85	82	0	3	yes	-
chr3:189815411..189815469:+	39.8	aaaaguaauugugguuuuugc	caaaacccgcaguuacuuuugc	aaaaguaauugugguuuuugcaauuaugcuuaguggcaaaacccgcaguuacuuuugc	86 +/- 9%	76	61	0	15	yes	-
chr16:24273082..24273139:-	36.9	aaaaguaauugugguuuuugc	uaaaacuacaauuacuuuugc	aaaaguaauugugguuuuugccgugacuuugaaugguaaaacuacaauuacuuuugc	86 +/- 9%	63	62	0	1	yes	hsa-miR-559:MIMAT0003223
chr1:222050321..222050380:+	15.5	caaaaaccgcaauuacuuuugc	ugaaaguaaucgcgguuuu	ugaaaguaaucgcgguuuucaccauuacuuuuaguggcaaaaaccgcaauuacuuuugc	86 +/- 9%	30	29	0	1	yes	-
chr1:212022327..212022385:-	14.3	uguggccucuggguguguacccu	aguguacuuccugaggccuc	aguguacuuccugaggccucuggguauaaaauuccuguggccucuggguguguacccu	86 +/- 9%	26	20	0	6	yes	-
chr12:41976864..41976921:+	12.3	ugugcagaacucauagaaggc	uucugugaguccuaugcagaac	uucugugaguccuaugcagaacucauaggggugcucugugcagaacucauagaaggc	86 +/- 9%	22	19	0	3	yes	-
chr9:125976485..125976543:-	13.1	uugggugacauuuguagaug	uuuacacgugucgcucgggacg	uugggugacauuuguagaugucucuguaucuugacauuuacacgugucgcucgggacg	86 +/- 9%	17	16	0	1	yes	hsa-miR-1262:MIMAT0005914
chr3:9554566..9554624:+	9.8	aaaggucauugcagauuuugcc	caaaaucgucuaugacuuuugc	aaaggucauugcagauuuugccauuacuuuuaguggcaaaaucgucuaugacuuuugc	86 +/- 9%	17	12	0	5	yes	-
chr20:87818413..87818469:+	11.1	ucucaggaugccgcugcacg	uguggcugugugcugaggguc	uguggcugugugcugagggucuguggucccugcgacucucaggaugccgcugcacg	86 +/- 9%	12	9	0	3	yes	hsa-miR-3664-3p:MIMAT0019220
chr15:78189797..78189834:+	4.4	acucuggggaaaaagaac	ucuugcucccugggaaau	ucuugcucccugggaaauaacucuggggaaaaagaac	86 +/- 6%	76	76	0	0	yes	hsa-miR-330-5p:MIMAT0004693
chr7:132931859..132931907:+	4.7	uaccuugcccugcccccc	gguggaaggaagccagcuauc	gguggaaggaagccagcuauccuaaaaggauaccuugcccugcccccc	86 +/- 6%	18	18	0	0	yes	hsa-miR-3200-3p:MIMAT0015085
chr16:59542464..59542528:-	4.2	acuggacugugaaaccaggcacc	ugcuugaaggucacaguccaccuc	acuggacugugaaaccaggcacccccaccuagcccauaggugcuugaaggucacaguccaccuc	86 +/- 6%	14	14	0	0	yes	hsa-miR-378a-3p:MIMAT0000732
chr1:120066849..120066909:-	4.3	cacauggccaaaacagagaagg	uucucuguuucggccacgugug	uucucuguuucggccacgugugaggggcugugaguacacacauggccaaaacagagaagg	86 +/- 6%	6	3	0	3	yes	-
chr17:28813574..28813632:-	4.4	uguuguacuuuuuuuuuugu	acaaaaaaaaaagcccaaccc	uguuguacuuuuuuuuuuguucguugcauuuuuaggaacaaaaaaaaaagcccaaccc	83 +/- 8%	103	93	0	10	yes	hsa-miR-3613-5p:MIMAT0017990
chr16:59542464..59542528:-	4.2	acuggacugugaaaccaggcacc	ugcuugaaggucacaguccaccuc	acuggacugugaaaccaggcacccccaccuagcccauaggugcuugaaggucacaguccaccuc	83 +/- 8%	14	14	0	0	yes	hsa-miR-378a-3p:MIMAT0000732
chr3:56592609..56592661:-	4.2	aaaaguaauugugggcuuugc	aauggccgcaauuacuuuuac	aaaaguaauugugggcuuugccauuacuuuuaauggccgcaauuacuuuuac	83 +/- 8%	10	10	0	0	yes	hsa-miR-559:MIMAT0003223
chr16:63341749..63341805:-	2.5	cagccccgggcacuucucugc	ggggagggcuggggggaagcc	ggggagggcuggggggaagccgggucgaaauccggcagccccgggcacuucucugc	73 +/- 5%	50	50	0	0	yes	-
chr16:56897246..56897302:+	2.4	cagccccgggcacuucucugc	ggggagggcuugggggaaguc	ggggagggcuugggggaagucgggccgaaauccggcagccccgggcacuucucugc	73 +/- 5%	50	50	0	0	yes	-
chr2:39064945..39065005:+	2.1	uaugucugacuauacaaagcc	cuuuguauagucagacauauu	uaugucugacuauacaaagcccaugaacuuuuacauaggcuuuguauagucagacauauu	73 +/- 5%	28	28	0	0	yes	-
chrX:17618695..17618757:-	2.1	uaggauauuuucaacucauga	gugaguugaaaauauccuaag	gugaguugaaaauauccuaagucgaaagugcauuuacaacuuaggauauuuucaacucauga	73 +/- 5%	28	28	0	0	yes	-
chr2:179144831..179144890:+	2.8	aagcaggauucagacuacaaua	uguugucguucccccugcuca	aagcaggauucagacuacaauauagcugcuaagugcuguguugucguucccccugcuca	73 +/- 5%	25	21	0	4	yes	hsa-miR-6165:MIMAT0024782
chr3:172982712..172982770:-	2.1	ugagccacugugccugaccc	agcucggugcaguggcucac	ugagccacugugccugacccuguuggaauauaaaaaagagcucggugcaguggcucac	73 +/- 5%	23	22	0	1	yes	-
chr2:159384107..159384167:-	2	uuucuggcugagccuguggcuuacc	gaggccacagcagccaggaaaa	uuucuggcugagccuguggcuuaccugggauuggaacagaggccacagcagccaggaaaa	73 +/- 5%	23	23	0	0	yes	-
chr3:176527468..176527525:-	2.8	ucucucggacaagcuguaggu	aauuacagauugucucagaga	aauuacagauugucucagagaaaacagaugaguuacucucucggacaagcuguaggu	73 +/- 5%	20	10	0	10	yes	hsa-miR-3615:MIMAT0017994
chr4:32922243..32922297:-	2	ucgagaauugcguuuggacaa	guccagacucaacucucggcc	guccagacucaacucucggccagagccauagacucgagaauugcguuuggacaa	73 +/- 5%	19	19	0	0	yes	-
chr9:6438081..6438147:+	2.5	caagcucugcagugggaacuga	ucagcucccacugcagaggc	ucagcucccacugcagaggcuggggagccggacagcucccuucccaagcucugcagugggaacuga	73 +/- 5%	16	15	0	1	yes	-
chr15:31479652..31479714:+	2.1	cgucucauagaagccacugcccc	ggaguggcuucuaugagacaua	cgucucauagaagccacugcccccaaauucacuuucugggggaguggcuucuaugagacaua	73 +/- 5%	15	15	0	0	yes	-
chr7:64116256..64116318:-	2	uuucccuaaucacauauugcuuc	agcaauaugugauuaguaaaag	uuucccuaaucacauauugcuucugaagcauggaaggugaagcaauaugugauuaguaaaag	73 +/- 5%	15	15	0	0	yes	-
chr11:112946430..112946487:-	2	uguguccuguuauuggugauu	ucaccaauaaugggacacuaa	ucaccaauaaugggacacuaaugugauucauguuguuguguccuguuauuggugauu	73 +/- 5%	12	12	0	0	yes	-
chr12:65415275..65415327:-	2.8	auuggcacacauugaacccu	gguucacugugugccaauug	gguucacugugugccaauugccucucccuucaauuggcacacauugaacccu	73 +/- 5%	6	6	0	0	yes	hsa-miR-96-5p:MIMAT0000095
chr12:42670436..42670506:-	2.2	acacaccugaucccaugagaag	ucucaugggaucagguguaugu	acacaccugaucccaugagaagugcugucguaucacagccaacaguggucucaugggaucagguguaugu	73 +/- 5%	5	5	0	0	yes	hsa-miR-1228-3p:MIMAT0005583
chr9:51242411..51242475:+	2	aggguggacugucucagagugg	acccgggacuagucugcccagg	aggguggacugucucagaguggugaugucacuugucuuagucacccgggacuagucugcccagg	73 +/- 5%	5	3	0	2	yes	hsa-miR-363-5p:MIMAT0003385
chr3:123916882..123916937:-	2.8	ugucaaccuugacuuccucuga	aaagcaagucaggcuuggcaa	ugucaaccuugacuuccucugacaugucauggccaaagcaagucaggcuuggcaa	73 +/- 5%	4	2	0	2	yes	-
chr1:13052429..13052490:+	2.8	aaguaguuucaugauaaaggg	uuuaucugaaacugcuugagga	aaguaguuucaugauaaagggugugugggaggucaaccuuuuaucugaaacugcuugagga	73 +/- 5%	3	2	0	1	yes	-
chrX:36294278..36294342:+	2.5	ugaccggcuaggagaggacac	uuccccuaccagccgguucgcgg	uuccccuaccagccgguucgcggcgccucuuggagcuaaccugugaccggcuaggagaggacac	73 +/- 5%	3	1	0	2	yes	-
chr7:160019594..160019680:+	2.4	aggucucugauuauauuucac	ugaaauaugaucagagaccug	aggucucugauuauauuucacucugaaaugugagugacacauaacaaaacacucugaaacaugagugaaauaugaucagagaccug	73 +/- 5%	2	1	0	1	yes	-
chr7:13944925..13944985:+	2.3	ggaguguauuaguuaggguaag	ugcccuaacuaguauacuacc	ugcccuaacuaguauacuaccugucaccucaucuaaugggaguguauuaguuaggguaag	73 +/- 5%	2	1	0	1	yes	-
chr7:20411433..20411490:-	2.2	ugacccaaccaggcuggucc	accagccugucuuggguggc	accagccugucuuggguggcugcugcugugagaacugugacccaaccaggcuggucc	73 +/- 5%	2	1	0	1	yes	-
chr1:81745044..81745103:-	2.2	auacgugacaaagcuccugaa	ucaggaacuuugucacguauga	auacgugacaaagcuccugaaaauaagucagauauuuucaggaacuuugucacguauga	73 +/- 5%	2	1	0	1	yes	-
chr14:75755622..75755687:-	1.3	cuccuggcuggcucgcca	gcugcagcccuccauaggca	gcugcagcccuccauaggcagaggagacaguaagccugucaucuccacuccuggcuggcucgcca	73 +/- 4%	450	450	0	0	yes	-
chr12:105723427..105723493:+	1.6	uuucuaaacuaacugaagcc	uuucaguuaauuuagaaagu	uuucuaaacuaacugaagccuaugaacaucccaaauuugagacagguuucaguuaauuuagaaagu	73 +/- 4%	314	314	0	0	yes	-
chr3:176724099..176724152:-	1.9	cugugguuccuguaugaagaca	ucuucaugcaggaaccacauuu	cugugguuccuguaugaagacaguagcggugucuucaugcaggaaccacauuu	73 +/- 4%	259	259	0	0	yes	-
chrX:145374891..145374950:-	1.3	ugauugaaaccucuacgaguag	acucgagagaguagcaaucaca	acucgagagaguagcaaucacauaugguaaucacauaugauugaaaccucuacgaguag	73 +/- 4%	107	107	0	0	yes	-
chr9:97043596..97043648:-	1.4	uuaacccuguacaguacuc	guucucuacagggugaug	guucucuacagggugaugcuaaaaugguggucauuaacccuguacaguacuc	73 +/- 4%	86	86	0	0	yes	-
chr5:30881924..30881985:-	1.7	uaugauuagaugauauggacc	uccauaucaucuaaucacagu	uaugauuagaugauauggaccuauggauacaggauacagguccauaucaucuaaucacagu	73 +/- 4%	59	59	0	0	yes	-
chr3:167134029..167134093:+	1.2	uuauggcccuucgguaauucacug	gugaauucuaccagugccauacac	uuauggcccuucgguaauucacugaccgagacuguucacagugaauucuaccagugccauacac	73 +/- 4%	46	46	0	0	yes	-
chr13:70772282..70772348:+	1.6	gugcaaaaguaauugugguuu	accgcaguuacuuuugcacaa	gugcaaaaguaauugugguuuuggucuuaaaaaguaauagugaaaaccgcaguuacuuuugcacaa	73 +/- 4%	44	44	0	0	yes	-
chr6:96835784..96835846:+	1.8	acuggauccuagauaucugugc	acagaggucgggaaucagggu	acuggauccuagauaucugugcuacuuuuuucagucuaagcacagaggucgggaaucagggu	73 +/- 4%	31	31	0	0	yes	-
chr10:80038547..80038603:-	1.9	uccgagcugcugcugcugac	gcgcagccgcagcccgggac	gcgcagccgcagcccgggaccuuggaggauaggugguccgagcugcugcugcugac	73 +/- 4%	28	28	0	0	yes	-
chr10:80038507..80038567:-	1.1	uccgagcugcugcugcugac	aagcaggagcaggaggagu	uccgagcugcugcugcugacgucagcaguaacagaggcacaaagcaggagcaggaggagu	73 +/- 4%	28	28	0	0	yes	-
chr4:63704720..63704765:-	1.3	ugagaugaugcacuguagg	uuagugaagucaguugaau	ugagaugaugcacuguagguugugccuuagugaagucaguugaau	73 +/- 4%	25	25	0	0	yes	hsa-miR-143-3p:MIMAT0000435
chr7:20273425..20273492:+	1.9	ccccagagcucggcugcugcc	cugcagccaaguucugggaga	ccccagagcucggcugcugccugcucaaagcuguggaucucaugggcugcagccaaguucugggaga	73 +/- 4%	20	20	0	0	yes	-
chr9:31903226..31903286:+	1.7	acccuuuccgauaguuguugc	aacaaguauaggaaagaguuc	acccuuuccgauaguuguugcuauacuuguugauuaagcaacaaguauaggaaagaguuc	73 +/- 4%	19	19	0	0	yes	-
chr6:103295371..103295430:-	1	auaggaugaacacauuaauga	guuaauguguucauacuacaugu	guuaauguguucauacuacaugucuggcaugaacauacauaggaugaacacauuaauga	73 +/- 4%	18	18	0	0	yes	-
chr20:47810130..47810197:-	1.7	aagagauggaacuuggguguga	gcgcccaaguuccaucucauuca	gcgcccaaguuccaucucauucaauaaguauuuaaugaacgagagaagagauggaacuuggguguga	73 +/- 4%	11	11	0	0	yes	-
chr12:83406811..83406876:-	1.5	cucucucugaccacccaccag	ggugggugagggaggagaggc	ggugggugagggaggagaggcccgcuggccaagcccauguacgccucucucugaccacccaccag	73 +/- 4%	11	11	0	0	yes	-
chr11:105545325..105545387:+	1.2	uugggcagcucuuugcaguaga	ugcugcaaagagcugcccaaaa	ugcugcaaagagcugcccaaaacaaauauauauacuuauuuugggcagcucuuugcaguaga	73 +/- 4%	10	10	0	0	yes	-
chr3:85799460..85799515:-	1.1	uaucuccuauugcuuuuguu	cagaagcaauaggagauuuaaug	cagaagcaauaggagauuuaauguaauaagagauauaucuccuauugcuuuuguu	73 +/- 4%	10	10	0	0	yes	-
chr9:59172735..59172794:+	1	uuccacauugggccugugagc	uccaagccaaauguggagua	uuccacauugggccugugagcagauccuuucagcucugcuccaagccaaauguggagua	73 +/- 4%	10	10	0	0	yes	-
chr17:30375395..30375450:+	1.8	uguaguuguacuguauugcc	caauacaguacaaauacagu	caauacaguacaaauacaguguguuugauuugcacuguaguuguacuguauugcc	73 +/- 4%	5	5	0	0	yes	hsa-miR-4703-3p:MIMAT0019802
chr2:101860128..101860172:-	1.1	acuggacuuggaguuaga	uuguuccaggcggguca	uuguuccaggcgggucauaguuguggacuggacuuggaguuaga	73 +/- 4%	5	5	0	0	yes	hsa-miR-378a-3p:MIMAT0000732
chr6:4273924..4273982:+	1.6	uggggauugaugaccagcucgg	cagcugaucauuaauccccagg	uggggauugaugaccagcucggaugaucaacucucccagcugaucauuaauccccagg	73 +/- 4%	4	4	0	0	yes	hsa-miR-4450:MIMAT0018971
chr6:147766442..147766514:+	1.2	uuccugagucucuguacauaga	uaugggcagaggcucaggaagc	uaugggcagaggcucaggaagcuucauauugaagcucuaaacccucuagcuuccugagucucuguacauaga	73 +/- 4%	4	4	0	0	yes	hsa-miR-1200:MIMAT0005863
chr8:99213608..99213666:+	1.6	aggacuagaccugaauuucagg	ugaaaucuaggucuagucccugg	aggacuagaccugaauuucaggaauaggcuuuucuugaaaucuaggucuagucccugg	73 +/- 4%	3	3	0	0	yes	hsa-miR-6503-3p:MIMAT0025463
chr11:105706126..105706186:+	1.3	ugugggaccucuggccuuggc	caaggccacagguccuacaac	caaggccacagguccuacaacagggcuggaaagcacaccugugggaccucuggccuuggc	73 +/- 4%	3	3	0	0	yes	hsa-miR-4648:MIMAT0019710
chr1:26584177..26584243:+	1.2	agguuggguuguagaagc	uucugcggucgccgccgac	uucugcggucgccgccgacuccauuuugucgguagaggcagaaggaggagguuggguuguagaagc	73 +/- 4%	3	3	0	0	yes	hsa-miR-92a-1-5p:MIMAT0004507
chr9:121856081..121856142:+	1.9	uucgccuccuaggugcuuugcc	cacggcacccaggaaggc	cacggcacccaggaaggcuggaagugcugucuaauuucuuucgccuccuaggugcuuugcc	73 +/- 4%	2	1	0	1	yes	-
chr8:107066204..107066263:-	1.9	uuauuuacacagauucauuugc	auaugaaucuguguaaauaaa	uuauuuacacagauucauuugcuuaacaaaugauaaacauaugaaucuguguaaauaaa	73 +/- 4%	2	1	0	1	yes	-
chr7:108088213..108088271:-	1.8	caauguaauugcgcuuuuugcc	aaagaccgcaguuacuuuugc	caauguaauugcgcuuuuugccuuuuaaaguaauggcaaagaccgcaguuacuuuugc	73 +/- 4%	2	1	0	1	yes	-
chr12:42256455..42256500:-	1.6	caggagagccuguccacaucc	gaugugacaggccuuccaa	caggagagccuguccacaucccugcagaugugacaggccuuccaa	73 +/- 4%	2	1	0	1	yes	-
chr8:134592570..134592626:+	1	ucaggaacugagacagcagagcu	cucuccugucccaauuccugagg	cucuccugucccaauuccugaggguggguagccucaggaacugagacagcagagcu	73 +/- 4%	2	2	0	0	yes	hsa-miR-873-5p:MIMAT0004953
chr16:20455692..20455747:-	1	uuccgggaccggacgccgcu	cugcggccggucccggggcc	cugcggccggucccggggccccgaacaggaagggguuccgggaccggacgccgcu	73 +/- 4%	2	2	0	0	yes	hsa-miR-4497:MIMAT0019032
chr8:96489951..96490009:-	3.6	acuggacuuggagucagaag	ucccugcucuaagucccauuu	acuggacuuggagucagaagaccuucauccaagucauucccugcucuaagucccauuu	72 +/- 7%	12791	12791	0	0	yes	hsa-miR-378a-3p:MIMAT0000732
chr8:96489951..96490009:-	3.6	acuggacuuggagucagaag	ucccugcucuaagucccauuu	acuggacuuggagucagaagaccuucauccaagucauucccugcucuaagucccauuu	72 +/- 7%	11246	11246	0	0	yes	hsa-miR-378a-3p:MIMAT0000732
chr10:78360529..78360586:+	3.7	cucccaccuuuuucuccc	gaucaaaaggggaugac	cucccaccuuuuucucccuacucugagcauucaccgaaaggaucaaaaggggaugac	72 +/- 7%	4776	4776	0	0	yes	hsa-miR-1260a:MIMAT0005911
chr5:5091273..5091338:-	3.4	uuggacuuggagucagaagaa	ucacugacucaagcugagu	uuggacuuggagucagaagaaugccaagcacagaaagcuucacugaucacugacucaagcugagu	72 +/- 7%	20	20	0	0	yes	hsa-miR-5009-5p:MIMAT0021041
chr11:99295969..99296040:-	3.2	gaggagcucacagucuag	gggcuuagaaagaauuuca	gaggagcucacagucuagaaaugcugagagauuuaucugaagccuuaauucugggcuuagaaagaauuuca	72 +/- 7%	11	11	0	0	yes	hsa-miR-28-5p:MIMAT0000085
chr3:167133810..167133874:+	3.3	auuggcacugcacaugauugc	aaaaaugugcuagugccaaaau	auuggcacugcacaugauugcucagagcggagagacacaagcaaaaaugugcuagugccaaaau	72 +/- 7%	8	8	0	0	yes	hsa-miR-96-5p:MIMAT0000095
chr15:106899507..106899566:-	3.9	uuccugcugaacugagccag	ugauaucagcucaguaggcaccg	uuccugcugaacugagccaguguguaaaaugagaacugauaucagcucaguaggcaccg	72 +/- 7%	6	5	0	1	yes	-
chr12:90626365..90626428:-	3.4	ccaaaaguaauuguggguuu	accacaaauacuuuugcacca	ccaaaaguaauuguggguuuuguaauuucauuuaugacaaaaaccacaaauacuuuugcacca	72 +/- 7%	6	3	0	3	yes	-
chr11:133992901..133992953:+	3.2	caugccuguagucccagc	ugagacugaggcuugaugccag	caugccuguagucccagcuacucaggaggcugagacugaggcuugaugccag	72 +/- 7%	6	5	0	1	yes	-
chr17:90323138..90323199:-	3.7	ucuggggcccugggcagaccucc	aggacugcuggaggaccgcagaga	aggacugcuggaggaccgcagagaaaugagccuacuccucuggggcccugggcagaccucc	72 +/- 7%	5	2	0	3	yes	-
chr5:120518512..120518571:+	3.4	uuauguaugugcauaugug	auauauacacauacauauaca	uuauguaugugcauauguguaugugcauauauuuacacauauauacacauacauauaca	72 +/- 7%	5	4	0	1	yes	-
chr1:13052429..13052487:+	3.4	ccuuuuaucugaaacugcuuga	aaguaguuucaugauaaagggug	aaguaguuucaugauaaagggugugugggaggucaaccuuuuaucugaaacugcuuga	72 +/- 7%	4	2	0	2	yes	-
chr17:90323138..90323199:-	3.2	ucuggggcccugggcagaccucc	aggacugcuggaggaccgcagag	aggacugcuggaggaccgcagagaaaugagccuacuccucuggggcccugggcagaccucc	72 +/- 7%	4	2	0	2	yes	-
chr4:36382314..36382371:+	3	aagagaacuaaaaguggaguc	cucuaauuuuaguucucuugc	aagagaacuaaaaguggagucuggagaugugacaagcucuaauuuuaguucucuugc	72 +/- 7%	4	3	0	1	yes	-
chr7:163376692..163376752:-	2.4	ucgaggagcucacagucuag	cucuucggggcucccgaga	cucuucggggcucccgagacacagaaacagacaccugcccucgaggagcucacagucuag	71 +/- 6%	6952	6952	0	0	yes	hsa-miR-151a-5p:MIMAT0004697
chr16:63341749..63341805:-	2.5	cagccccgggcacuucucugc	ggggagggcuggggggaagcc	ggggagggcuggggggaagccgggucgaaauccggcagccccgggcacuucucugc	71 +/- 6%	41	41	0	0	yes	-
chr16:56897246..56897302:+	2.4	cagccccgggcacuucucugc	ggggagggcuugggggaaguc	ggggagggcuugggggaagucgggccgaaauccggcagccccgggcacuucucugc	71 +/- 6%	41	41	0	0	yes	-
chr3:176527468..176527525:-	2.3	ucucggacaagcuguaggu	aauuacagauugucucagaga	aauuacagauugucucagagaaaacagaugaguuacucucucggacaagcuguaggu	71 +/- 6%	14	8	0	6	yes	hsa-miR-3917:MIMAT0018191
chrX:17618695..17618759:-	2.1	uaggauauuuucaacucauga	ucgugaguugaaaauaucc	ucgugaguugaaaauauccuaagucgaaagugcauuuacaacuuaggauauuuucaacucauga	71 +/- 6%	13	12	0	1	yes	-
chr2:179144831..179144891:+	2.8	aagcaggauucagacuacaaua	uugucguucccccugcucaa	aagcaggauucagacuacaauauagcugcuaagugcuguguugucguucccccugcucaa	71 +/- 6%	12	12	0	0	yes	hsa-miR-6165:MIMAT0024782
chr18:14675846..14675894:+	2.5	aaaagcuggguugagaggg	uuaucuucccaguucuucc	uuaucuucccaguucuucccagagucaggaaaagcuggguugagaggg	71 +/- 6%	12	12	0	0	yes	hsa-miR-320a:MIMAT0000510
chr1:45801669..45801720:+	2.1	uuuguucuguuucucuugaga	ucaagagaaagagaacaaaua	ucaagagaaagagaacaaauauauaaucuauuuguucuguuucucuugaga	71 +/- 6%	12	12	0	0	yes	-
chr2:101860128..101860172:-	2.7	acuggacuuggaguuaga	uuguuccaggcggguca	uuguuccaggcgggucauaguuguggacuggacuuggaguuaga	71 +/- 6%	8	8	0	0	yes	hsa-miR-378a-3p:MIMAT0000732
chr1:86028005..86028066:+	2.3	aaguucugacuagacuuuugg	aaaaguccagucagacucuuua	aaaaguccagucagacucuuuaagaauaauaggacucuuuaaguucugacuagacuuuugg	71 +/- 6%	6	6	0	0	yes	hsa-miR-148b-5p:MIMAT0004699
chr7:157181066..157181132:-	2.3	ccuguggguaaacauagcuaucc	augguuuugguuuccucacag	ccuguggguaaacauagcuauccugcaaaacuguucaugaccaggaugguuuugguuuccucacag	71 +/- 6%	4	3	0	1	yes	-
chr8:99213608..99213663:+	2.1	aggacuagaccugaauuucagg	cuugaaaucuaggucuaguccc	aggacuagaccugaauuucaggaauaggcuuuucuugaaaucuaggucuaguccc	71 +/- 6%	4	3	0	1	yes	hsa-miR-6503-3p:MIMAT0025463
chr18:29631715..29631774:+	2.5	ucuucaaaggggcuuaggucugaa	aggccuaagccaucucugaaga	aggccuaagccaucucugaagaugaaaacuauccaucuucaaaggggcuuaggucugaa	71 +/- 6%	3	2	0	1	yes	-
chr7:138904276..138904337:+	2.1	ccucagauucuggauuccuacc	uugaaaugcagagucugaucc	uugaaaugcagagucugauccaguaagucuagaauccugccucagauucuggauuccuacc	71 +/- 6%	3	2	0	1	yes	-
chr12:103268947..103269008:-	2.4	uggcagaaaguggggccccggc	aggggccuugcuggcuggcac	aggggccuugcuggcuggcacugugccauuuaagucgaguggcagaaaguggggccccggc	71 +/- 6%	2	1	0	1	yes	-
chr10:62611414..62611488:+	2.2	cgcacugacuuuugcaccaacc	uggugcagaggucagugcaguu	uggugcagaggucagugcaguuacuuuugccauuacuuuuaacggcaaaaaccgcacugacuuuugcaccaacc	71 +/- 6%	2	1	0	1	yes	-
chrX:152105082..152105151:+	2.2	uauggaagggagaagagcuuua	aaagcuguucucccuuccaua	uauggaagggagaagagcuuuaaugauuggagucauuuucagagcauuaaagcuguucucccuuccaua	71 +/- 6%	2	1	0	1	yes	-
chr3:176724099..176724152:-	1.9	cugugguuccuguaugaagaca	ucuucaugcaggaaccacauuu	cugugguuccuguaugaagacaguagcggugucuucaugcaggaaccacauuu	70 +/- 5%	246	246	0	0	yes	-
chr19:23155989..23156044:-	1.6	gcuguggugagccuugaagcc	uggagcugccacgggug	gcuguggugagccuugaagccuagggcaugagccuggguggagcugccacgggug	70 +/- 5%	108	108	0	0	yes	-
chr1:222050325..222050377:+	1	caaaaaccgcaauuacuuu	aguaaucgcgguuuucacc	aguaaucgcgguuuucaccauuacuuuuaguggcaaaaaccgcaauuacuuu	70 +/- 5%	91	91	0	0	yes	-
chr2:50553483..50553564:+	1.7	ucccuggcaucuccacca	gcggagaggagggaag	gcggagaggagggaaguagggcggcccuguguuucugucucccccagaaccccgccucccacuucccuggcaucuccacca	70 +/- 5%	84	84	0	0	yes	-
chr14:72822792..72822839:+	1.7	caaaaacuacaauuacuuu	aguuauugcaguuuuugca	aguuauugcaguuuuugcaauacguuggcaaaaacuacaauuacuuu	70 +/- 5%	67	67	0	0	yes	-
chr9:97043596..97043648:-	1.4	uuaacccuguacaguacuc	guucucuacagggugaug	guucucuacagggugaugcuaaaaugguggucauuaacccuguacaguacuc	70 +/- 5%	52	52	0	0	yes	-
chr12:105723427..105723493:+	1.6	uuucuaaacuaacugaagcc	uuucaguuaauuuagaaagu	uuucuaaacuaacugaagccuaugaacaucccaaauuugagacagguuucaguuaauuuagaaagu	70 +/- 5%	27	27	0	0	yes	-
chr2:159384107..159384167:-	1.9	uuucuggcugagccuguggcuuac	aggccacagcagccaggaaaa	uuucuggcugagccuguggcuuaccugggauuggaacagaggccacagcagccaggaaaa	70 +/- 5%	25	25	0	0	yes	-
chrX:116366553..116366607:+	1.3	acuagacuuggagucagaagaca	ugcuaugugacauuaaguuagugc	acuagacuuggagucagaagacaauuuaugugcuaugugacauuaaguuagugc	70 +/- 5%	21	21	0	0	yes	-
chr5:30881924..30881985:-	1.7	uaugauuagaugauauggacc	uccauaucaucuaaucacagu	uaugauuagaugauauggaccuauggauacaggauacagguccauaucaucuaaucacagu	70 +/- 5%	20	20	0	0	yes	-
chr4:95368101..95368155:+	1.8	auacucucgcuugagcgcugcc	cagcgcucaagcgagaguauuc	cagcgcucaagcgagaguauuccaaggauggaauacucucgcuugagcgcugcc	70 +/- 5%	11	11	0	0	yes	-
chr2:39064945..39065005:+	1.8	uaugucugacuauacaaagcc	cuuuguauagucagacauauu	uaugucugacuauacaaagcccaugaacuuuuacauaggcuuuguauagucagacauauu	70 +/- 5%	11	11	0	0	yes	-
chr4:32922243..32922297:-	1.6	ucgagaauugcguuuggacaa	guccagacucaacucucggcc	guccagacucaacucucggccagagccauagacucgagaauugcguuuggacaa	70 +/- 5%	11	11	0	0	yes	-
chr12:65415276..65415326:-	1.8	auuggcacacauugaaccc	guucacugugugccaauug	guucacugugugccaauugccucucccuucaauuggcacacauugaaccc	70 +/- 5%	4	4	0	0	yes	hsa-miR-96-5p:MIMAT0000095
chr6:167769227..167769282:-	1.6	uaacgcauaauauggauaugu	auauccauaauaugcguuagu	auauccauaauaugcguuaguuguggacacauacuaacgcauaauauggauaugu	70 +/- 5%	4	4	0	0	yes	hsa-miR-3912:MIMAT0018186
chr8:69686243..69686302:-	1.6	augcaugccagaucaggaggcaac	gcaaaaucucggcauuggcuc	gcaaaaucucggcauuggcucuacugaagauggugaugcaugccagaucaggaggcaac	70 +/- 5%	3	2	0	1	yes	-
chr8:146751538..146751607:-	1.6	ccuguuugucugaaauucaaau	uuugaauuccagacaaacaguaa	ccuguuugucugaaauucaaauuuaacuguauccuguacaguaaauuuugaauuccagacaaacaguaa	70 +/- 5%	3	2	0	1	yes	-
chrX:51519323..51519397:-	1	ugccugcccucuuccuccaggu	cuggaggaaguggggcaagaagg	cuggaggaaguggggcaagaaggaggaugcagagcugggccagacaugcucuugccugcccucuuccuccaggu	70 +/- 5%	3	3	0	0	yes	hsa-miR-4763-5p:MIMAT0019912
chr15:4088778..4088844:-	1.2	uggcucagcuccaacucugccc	gcggggcuggggcugggccacc	uggcucagcuccaacucugcccacguuggccuuugggguucaaggcggggcuggggcugggccacc	70 +/- 5%	2	2	0	0	yes	hsa-miR-24-3p:MIMAT0000080
chr8:96489951..96490009:-	3.6	acuggacuuggagucagaag	ucccugcucuaagucccauuu	acuggacuuggagucagaagaccuucauccaagucauucccugcucuaagucccauuu	69 +/- 8%	12775	12775	0	0	yes	hsa-miR-378a-3p:MIMAT0000732
chr2:101860128..101860172:-	3.7	acuggacuuggaguuaga	uuguuccaggcggguca	uuguuccaggcgggucauaguuguggacuggacuuggaguuaga	69 +/- 8%	10	10	0	0	yes	hsa-miR-378a-3p:MIMAT0000732
chr6:167769230..167769281:-	3.1	uaacgcauaauauggaua	uauccauaauaugcguuagu	uauccauaauaugcguuaguuguggacacauacuaacgcauaauauggaua	69 +/- 8%	7	5	0	2	yes	hsa-miR-3912:MIMAT0018186
chr1:13052429..13052487:+	3.9	aaguaguuucaugauaaaggg	cuuuuaucugaaacugcuuga	aaguaguuucaugauaaagggugugugggaggucaaccuuuuaucugaaacugcuuga	69 +/- 8%	5	3	0	2	yes	-
chr1:6543847..6543905:-	3.8	guuaaucauuggucucugugucc	gauggagaccagugauuaaug	guuaaucauuggucucuguguccucuuucuagcccaggauggagaccagugauuaaug	69 +/- 8%	5	3	0	2	yes	-
chr12:90626366..90626428:-	3	ccaaaaguaauuguggguuuug	aaaaccacaaauacuuuugcacc	ccaaaaguaauuguggguuuuguaauuucauuuaugacaaaaaccacaaauacuuuugcacc	69 +/- 8%	5	4	0	1	yes	-
chr12:103268946..103269008:-	3.2	aggggccuugcuggcuggcac	uggcagaaaguggggccccggca	aggggccuugcuggcuggcacugugccauuuaagucgaguggcagaaaguggggccccggca	69 +/- 8%	4	3	0	1	yes	-
chr6:113492585..113492643:+	1.1	aaaagcaacugugguuuuugc	aaaaaccauaauuacuuuugu	aaaagcaacugugguuuuugccauugaaaguaauggcaaaaaccauaauuacuuuugu	69 +/- 6%	397	397	0	0	yes	-
chr19:23155990..23156043:-	1.5	cuguggugagccuugaagcc	uggagcugccacgggu	cuguggugagccuugaagccuagggcaugagccuggguggagcugccacgggu	69 +/- 6%	136	136	0	0	yes	-
chr2:107569798..107569851:+	1.9	gaaaaacugcaauuacuuu	aguaauuccaguuuuugcc	aguaauuccaguuuuugccguuacuuuuaauggagaaaaacugcaauuacuuu	69 +/- 6%	91	91	0	0	yes	-
chr4:146792635..146792684:+	1.6	gaaaaacugcaauuacuuu	aguacuugcgguuuucua	aguacuugcgguuuucuauuaaaaugaauggaaaaacugcaauuacuuu	69 +/- 6%	90	90	0	0	yes	-
chr1:222050325..222050377:+	1	caaaaaccgcaauuacuuu	aguaaucgcgguuuucacc	aguaaucgcgguuuucaccauuacuuuuaguggcaaaaaccgcaauuacuuu	69 +/- 6%	60	60	0	0	yes	-
chr12:105723427..105723493:+	1.6	uuucuaaacuaacugaagcc	uuucaguuaauuuagaaagu	uuucuaaacuaacugaagccuaugaacaucccaaauuugagacagguuucaguuaauuuagaaagu	69 +/- 6%	59	59	0	0	yes	-
chr8:128128281..128128334:+	1.6	caaaaacuacaauuacuuu	aaaguacuugcgguuuuugc	aaaguacuugcgguuuuugcuauuacuuucaaugcaaaaacuacaauuacuuu	69 +/- 6%	52	51	0	1	yes	-
chr14:72822792..72822839:+	1.7	caaaaacuacaauuacuuu	aguuauugcaguuuuugca	aguuauugcaguuuuugcaauacguuggcaaaaacuacaauuacuuu	69 +/- 6%	51	51	0	0	yes	-
chr5:30881924..30881985:-	1.7	uaugauuagaugauauggacc	uccauaucaucuaaucacagu	uaugauuagaugauauggaccuauggauacaggauacagguccauaucaucuaaucacagu	69 +/- 6%	48	48	0	0	yes	-
chr9:97043596..97043648:-	1.4	uuaacccuguacaguacuc	guucucuacagggugaug	guucucuacagggugaugcuaaaaugguggucauuaacccuguacaguacuc	69 +/- 6%	39	39	0	0	yes	-
chrX:116366553..116366607:+	1.3	acuagacuuggagucagaag	ugugacauuaaguuagugc	acuagacuuggagucagaagacaauuuaugugcuaugugacauuaaguuagugc	69 +/- 6%	19	19	0	0	yes	-
chrX:140873385..140873471:-	1.6	uagugacagagcgagacccug	ggauugcuugagucagggaaguugag	ggauugcuugagucagggaaguugaggcuguagucaguggugauaaugccacugcacuccagccuuagugacagagcgagacccug	69 +/- 6%	15	14	1	0	yes	-
chr6:92974949..92975008:-	1.8	uuauacuuguuuguuguaguga	accacaacaaauagguauaaaa	accacaacaaauagguauaaaaguggaauuggaauuuuuauacuuguuuguuguaguga	69 +/- 6%	13	13	0	0	yes	-
chrX:145374891..145374950:-	1.3	ugauugaaaccucuacgaguag	acucgagagaguagcaaucaca	acucgagagaguagcaaucacauaugguaaucacauaugauugaaaccucuacgaguag	69 +/- 6%	13	13	0	0	yes	-
chr3:43499680..43499737:+	1.5	cugucauccuguuuggagugca	cacuccagccuggacaacagag	cacuccagccuggacaacagagcaaaacugucacucugucauccuguuuggagugca	69 +/- 6%	12	12	0	0	yes	-
chr9:67567378..67567443:-	1.2	cccccagucuggccacagagcc	ccugcagcccugccuggggugu	cccccagucuggccacagagccuuuaauauccagagaaucaggccugcagcccugccuggggugu	69 +/- 6%	12	12	0	0	yes	-
chr9:70141769..70141825:+	1.1	aacauuuaaaauuguagacugag	cagucuuaacuuuaaauguuaa	aacauuuaaaauuguagacugagucugcuuuacucagucuuaacuuuaaauguuaa	69 +/- 6%	12	12	0	0	yes	-
chr15:31479652..31479714:+	1.7	cgucucauagaagccacugccc	gaguggcuucuaugagacaua	cgucucauagaagccacugcccccaaauucacuuucugggggaguggcuucuaugagacaua	69 +/- 6%	11	11	0	0	yes	-
chr4:2595470..2595527:+	1.5	aaaaacugcaguuaccuuugc	aaaggaaauugcaguuuuugc	aaaggaaauugcaguuuuugccauuaaaaguaaugcaaaaacugcaguuaccuuugc	69 +/- 6%	11	11	0	0	yes	-
chr14:7902219..7902284:-	1.5	cccccgucuucucucuguucag	gggccgaggggagaauggggccc	gggccgaggggagaauggggccccagcuugaacccaggccugacccccgucuucucucuguucag	69 +/- 6%	11	11	0	0	yes	-
chr12:35075131..35075195:-	1.4	cuugaacuugagacuaagcc	cuuaaucucaacuucaaguc	cuuaaucucaacuucaaguccuggcucagccaccuauuaagugacuugaacuugagacuaagcc	69 +/- 6%	11	11	0	0	yes	-
chr16:59542465..59542527:-	1.8	cuggacugugaaaccaggcacc	ugcuugaaggucacaguccaccu	cuggacugugaaaccaggcacccccaccuagcccauaggugcuugaaggucacaguccaccu	69 +/- 6%	7	7	0	0	yes	hsa-miR-1269a:MIMAT0005923
chr14:92292768..92292828:-	1.8	uucucuauaggaugccauagc	uauguuuuccugaggagauaua	uucucuauaggaugccauagcacuccuauguuuggugcuauguuuuccugaggagauaua	69 +/- 6%	5	3	0	2	yes	-
chr12:42670436..42670506:-	1.3	acacaccugaucccaugagaag	ucucaugggaucagguguaugu	acacaccugaucccaugagaagugcugucguaucacagccaacaguggucucaugggaucagguguaugu	69 +/- 6%	3	3	0	0	yes	hsa-miR-1228-3p:MIMAT0005583
chr3:84630362..84630415:-	1.5	uuggcagagagcucucaguaac	aucugagaguacuuugucaagg	aucugagaguacuuugucaagguugcguuccuuggcagagagcucucaguaac	69 +/- 6%	2	1	0	1	yes	-
chr11:43919093..43919154:-	1.4	auuugauugauacuuggggcga	aguccaacuaucaaucgaaua	aguccaacuaucaaucgaauauguauuuuucaugcucauauuugauugauacuuggggcga	69 +/- 6%	2	1	0	1	yes	-
chr15:4088778..4088844:-	1.2	uggcucagcuccaacucugcc	cggggcuggggcugggccacc	uggcucagcuccaacucugcccacguuggccuuugggguucaaggcggggcuggggcugggccacc	69 +/- 6%	2	2	0	0	yes	hsa-miR-24-3p:MIMAT0000080
chr14:70113042..70113107:-	1.1	gcaagguggaugcaauguga	acauuguauccaccuuacca	gcaagguggaugcaaugugaccucaacacuugguccucugaggucacauuguauccaccuuacca	69 +/- 6%	2	2	0	0	yes	hsa-miR-4761-5p:MIMAT0019908
chr16:63341749..63341805:-	2.5	cagccccgggcacuucucugc	ggggagggcuggggggaagcc	ggggagggcuggggggaagccgggucgaaauccggcagccccgggcacuucucugc	68 +/- 8%	74	74	0	0	yes	-
chr16:56897246..56897302:+	2.4	cagccccgggcacuucucugc	ggggagggcuugggggaaguc	ggggagggcuugggggaagucgggccgaaauccggcagccccgggcacuucucugc	68 +/- 8%	74	74	0	0	yes	-
chr2:159384107..159384167:-	2	uuucuggcugagccuguggcuuacc	gaggccacagcagccaggaaaa	uuucuggcugagccuguggcuuaccugggauuggaacagaggccacagcagccaggaaaa	68 +/- 8%	23	23	0	0	yes	-
chr1:45801667..45801720:+	2.1	uuuguucuguuucucuugaga	uuucaagagaaagagaacaa	uuucaagagaaagagaacaaauauauaaucuauuuguucuguuucucuugaga	68 +/- 8%	19	18	0	1	yes	-
chr20:47810130..47810197:-	2.1	aagagauggaacuuggguguga	gcgcccaaguuccaucucauuca	gcgcccaaguuccaucucauucaauaaguauuuaaugaacgagagaagagauggaacuuggguguga	68 +/- 8%	13	13	0	0	yes	-
chr3:283196..283255:-	2.1	caugccacugcaccugccuaa	gggcaaggcgcgguggcuuacg	caugccacugcaccugccuaauuaaaaaaaaaaaauugggcaaggcgcgguggcuuacg	68 +/- 8%	12	12	0	0	yes	-
chr9:125976485..125976543:-	2.8	uugggugacauuuguagauguc	uuuacacgugucgcucgggacg	uugggugacauuuguagaugucucuguaucuugacauuuacacgugucgcucgggacg	68 +/- 8%	7	6	0	1	yes	hsa-miR-1262:MIMAT0005914
chr2:153386617..153386674:+	2.4	accgucucuucuguuucccagg	ggugggaaccauaagggucugu	ggugggaaccauaagggucugugcugucucugagcaccgucucuucuguuucccagg	68 +/- 8%	6	5	0	1	yes	hsa-miR-340-3p:MIMAT0000750
chr6:48607662..48607717:+	2.9	caaaaguaauugaaguuuugc	caaaaaucgcaacuacuuu	caaaaguaauugaaguuuugccauuaaaaguaacggcaaaaaucgcaacuacuuu	68 +/- 8%	4	3	0	1	yes	-
chr8:99213608..99213666:+	2.1	aggacuagaccugaauuucag	gaaaucuaggucuagucccugg	aggacuagaccugaauuucaggaauaggcuuuucuugaaaucuaggucuagucccugg	68 +/- 8%	4	4	0	0	yes	hsa-miR-6503-3p:MIMAT0025463
chr3:101595705..101595771:-	2.5	ucuagcuaccuugucugcaaca	cugcagaaaaguuagcuagaa	cugcagaaaaguuagcuagaauuuuaagagggauuauauugaauucuagcuaccuugucugcaaca	68 +/- 8%	3	2	0	1	yes	-
chr12:23738631..23738692:-	2.5	acuagauuuagggauugacac	gucaauucccaaaucuaguga	acuagauuuagggauugacacuggagcacuuggacagugugucaauucccaaaucuaguga	68 +/- 8%	3	2	0	1	yes	-
chr10:83327878..83327932:+	2.4	ccagaagagugacugagac	ucaguuacucucccuggcacu	ucaguuacucucccuggcacuuggaggucccagugccagaagagugacugagac	68 +/- 8%	2	1	0	1	yes	-
chr13:43359942..43360006:-	2.3	aacggucccuuugcaccccugucc	augggugcaaagggauugu	aacggucccuuugcaccccuguccagacacugcuaauggguccagaugggugcaaagggauugu	68 +/- 8%	2	1	0	1	yes	-
chr9:122034307..122034365:+	2.1	acacacaacugaacaucauag	ugaugcucuguuguguguaga	ugaugcucuguuguguguagauugaaagcccuaauuuacacacaacugaacaucauag	68 +/- 8%	2	1	0	1	yes	-
chr8:96489951..96490009:-	3.6	acuggacuuggagucagaag	ucccugcucuaagucccauuu	acuggacuuggagucagaagaccuucauccaagucauucccugcucuaagucccauuu	66 +/- 9%	8036	8036	0	0	yes	hsa-miR-378a-3p:MIMAT0000732
chr10:78360529..78360586:+	3.7	cucccaccuuuuucuccc	gaucaaaaggggaugac	cucccaccuuuuucucccuacucugagcauucaccgaaaggaucaaaaggggaugac	66 +/- 9%	3767	3767	0	0	yes	hsa-miR-1260a:MIMAT0005911
chr10:84006376..84006433:+	3.9	acgauaacacccaaguccgaa	uuggacuuuggugcuaccaua	uuggacuuuggugcuaccauaaaggaauauauacuuacgauaacacccaaguccgaa	66 +/- 9%	7	5	0	2	yes	-
chr8:1902655..1902719:+	3.9	uggccccagugucgugaucuc	ugucaugauaucuguguggcccca	ugucaugauaucuguguggccccacaguguuaugaugucugcguggccccagugucgugaucuc	66 +/- 9%	6	4	0	2	yes	-
chr7:163376692..163376752:-	2.4	ucgaggagcucacagucuag	cucuucggggcucccgaga	cucuucggggcucccgagacacagaaacagacaccugcccucgaggagcucacagucuag	63 +/- 7%	3368	3368	0	0	yes	hsa-miR-151a-5p:MIMAT0004697
chr4:32922243..32922297:-	2	ucgagaauugcguuuggacaa	guccagacucaacucucggcc	guccagacucaacucucggccagagccauagacucgagaauugcguuuggacaa	63 +/- 7%	13	13	0	0	yes	-
chr16:63341749..63341805:-	2.1	cagccccgggcacuucucugc	ggggagggcuggggggaagcc	ggggagggcuggggggaagccgggucgaaauccggcagccccgggcacuucucugc	63 +/- 7%	11	11	0	0	yes	-
chr16:56897246..56897302:+	2	cagccccgggcacuucucugc	ggggagggcuugggggaaguc	ggggagggcuugggggaagucgggccgaaauccggcagccccgggcacuucucugc	63 +/- 7%	11	11	0	0	yes	-
chr8:11661529..11661591:-	2.7	ugcagcucugguggaaaacggaga	uccaucucccccagggccuggug	ugcagcucugguggaaaacggagaagacuuuuccuuuccuccaucucccccagggccuggug	63 +/- 7%	7	7	0	0	yes	hsa-miR-4660:MIMAT0019728
chr2:101860128..101860172:-	2.1	acuggacuuggaguuaga	uuguuccaggcggguca	uuguuccaggcgggucauaguuguggacuggacuuggaguuaga	63 +/- 7%	7	7	0	0	yes	hsa-miR-378a-3p:MIMAT0000732
chr11:105706126..105706186:+	2.3	ugugggaccucuggccuuggc	caaggccacagguccuacaac	caaggccacagguccuacaacagggcuggaaagcacaccugugggaccucuggccuuggc	63 +/- 7%	5	5	0	0	yes	hsa-miR-4648:MIMAT0019710
chr16:72424817..72424880:+	2.1	aucauguaugauacugcaaaca	uuugcaguaacaggugugagc	uuugcaguaacaggugugagcauucuagcagcaguuuggugaucauguaugauacugcaaaca	63 +/- 7%	4	3	0	1	yes	-
chr1:67829480..67829540:-	2.7	aguguuucaaauuacuugaaga	ccucaaguaauuugaaauacucg	ccucaaguaauuugaaauacucguaauguuaaaaauuuaguguuucaaauuacuugaaga	63 +/- 7%	3	2	0	1	yes	-
chr15:39613002..39613057:+	2.5	ucuuuaggaacucuggcuaac	uuugccagaguuccugaagaa	uuugccagaguuccugaagaaagugggacuauuuucuuuaggaacucuggcuaac	63 +/- 7%	2	1	0	1	yes	-
chr9:103084714..103084773:-	5.1	ucgaccggaccucgaccggc	cucggcguggcgucggucg	ucgaccggaccucgaccggcucgucuguguugccaaucgacucggcguggcgucggucg	62 +/- 26%	162	147	0	15	yes	hsa-miR-1307-5p:MIMAT0022727
chr17:28813574..28813632:-	4.4	uguuguacuuuuuuuuuugu	acaaaaaaaaaagcccaaccc	uguuguacuuuuuuuuuuguucguugcauuuuuaggaacaaaaaaaaaagcccaaccc	62 +/- 19%	28	24	0	4	yes	hsa-miR-3613-5p:MIMAT0017990
chr8:37403745..37403794:+	4	uuugaggugacagugaac	ccacugcacuccagccugggc	uuugaggugacagugaaccguaauugcaccacugcacuccagccugggc	62 +/- 19%	9	6	0	3	yes	-
chr9:125405380..125405458:+	4	aaaaggcgggagaagccc	guuuccucugccuuuuuu	guuuccucugccuuuuuuccaaugaaaauaacaaaaccucuuauuucccauugagggggaaaaaggcgggagaagccc	62 +/- 19%	9	9	0	0	yes	hsa-miR-4484:MIMAT0019018
chr6:3094841..3094896:+	1	cgucugucugagcgucgc	gugcaucagccugaugug	gugcaucagccugaugugcaguuagcacugaaagccgcgucugucugagcgucgc	61 +/- 7%	281	281	0	0	yes	-
chr12:105723427..105723493:+	1.6	uuucuaaacuaacugaagcc	uuucaguuaauuuagaaagu	uuucuaaacuaacugaagccuaugaacaucccaaauuugagacagguuucaguuaauuuagaaagu	61 +/- 7%	100	100	0	0	yes	-
chr19:23155990..23156043:-	1.5	cuguggugagccuugaagcc	uggagcugccacgggu	cuguggugagccuugaagccuagggcaugagccuggguggagcugccacgggu	61 +/- 7%	82	82	0	0	yes	-
chr3:176724099..176724152:-	1.9	cugugguuccuguaugaagaca	ucuucaugcaggaaccacauuu	cugugguuccuguaugaagacaguagcggugucuucaugcaggaaccacauuu	61 +/- 7%	49	49	0	0	yes	-
chr9:97043596..97043648:-	1.4	uuaacccuguacaguacuc	guucucuacagggugaug	guucucuacagggugaugcuaaaaugguggucauuaacccuguacaguacuc	61 +/- 7%	17	17	0	0	yes	-
chr15:31479650..31479716:+	1.8	uacgucucauagaagccacugcccc	ggaguggcuucuaugagacauaca	uacgucucauagaagccacugcccccaaauucacuuucugggggaguggcuucuaugagacauaca	61 +/- 7%	11	11	0	0	yes	-
chr2:39064945..39065005:+	1.8	uaugucugacuauacaaagcc	cuuuguauagucagacauauu	uaugucugacuauacaaagcccaugaacuuuuacauaggcuuuguauagucagacauauu	61 +/- 7%	11	11	0	0	yes	-
chr1:199922779..199922824:+	1	uuucugucuauugaugag	ugaacaggagacaggaagug	ugaacaggagacaggaaguggcagucauuucugucuauugaugag	61 +/- 7%	4	4	0	0	yes	hsa-miR-4743-3p:MIMAT0022978
chr11:66573296..66573356:-	1.3	uuugggacugaucuugacac	aucaagaucagucccaaaua	uuugggacugaucuugacacucuuacauguuuuggcagacaucaagaucagucccaaaua	61 +/- 7%	3	3	0	0	yes	hsa-miR-3122:MIMAT0014984
chr12:65415276..65415326:-	1.2	auuggcacacauugaaccc	guucacugugugccaauug	guucacugugugccaauugccucucccuucaauuggcacacauugaaccc	61 +/- 7%	3	3	0	0	yes	hsa-miR-96-5p:MIMAT0000095
chr1:169270142..169270202:-	1.2	cugagguggcaucuagguacc	augccuagacugcaccccagac	augccuagacugcaccccagacuaauuaaaucagaaucucugagguggcaucuagguacc	61 +/- 7%	2	1	0	1	yes	-
chr9:125976486..125976543:-	9	uugggugacauuuguagauguc	cauuuacacgugucgcucgggac	uugggugacauuuguagaugucucuguaucuugacauuuacacgugucgcucgggac	61 +/- 29%	9	7	0	2	yes	hsa-miR-1262:MIMAT0005914
chr14:75755622..75755687:-	1.3	uccacuccuggcuggcucgcca	gcugcagcccuccauaggcagagg	gcugcagcccuccauaggcagaggagacaguaagccugucaucuccacuccuggcuggcucgcca	54 +/- 9%	338	338	0	0	yes	-
chr19:23155990..23156043:-	1.6	cuguggugagccuugaagcc	uggagcugccacgggu	cuguggugagccuugaagccuagggcaugagccuggguggagcugccacgggu	54 +/- 9%	189	189	0	0	yes	-
chr3:176724099..176724152:-	1.9	cugugguuccuguaugaagaca	ucuucaugcaggaaccacauuu	cugugguuccuguaugaagacaguagcggugucuucaugcaggaaccacauuu	54 +/- 9%	149	149	0	0	yes	-
chr1:222050325..222050377:+	1	caaaaaccgcaauuacuuu	aguaaucgcgguuuucacc	aguaaucgcgguuuucaccauuacuuuuaguggcaaaaaccgcaauuacuuu	54 +/- 9%	74	74	0	0	yes	-
chr9:97043596..97043648:-	1.4	uuaacccuguacaguacuc	guucucuacagggugaug	guucucuacagggugaugcuaaaaugguggucauuaacccuguacaguacuc	54 +/- 9%	39	39	0	0	yes	-
chrX:116366553..116366607:+	1.2	acuagacuuggagucagaag	ugugacauuaaguuagugc	acuagacuuggagucagaagacaauuuaugugcuaugugacauuaaguuagugc	54 +/- 9%	15	15	0	0	yes	-
chr2:107041441..107041500:-	1.8	uaacuccagaggguacuacuca	aguggugcccuugcaguugug	uaacuccagaggguacuacucauaacuuggucuuuuugaguggugcccuugcaguugug	54 +/- 9%	13	13	0	0	yes	-
chr3:283196..283255:-	1.7	caugccacugcaccugccuaa	gggcaaggcgcgguggcuuacg	caugccacugcaccugccuaauuaaaaaaaaaaaauugggcaaggcgcgguggcuuacg	54 +/- 9%	11	11	0	0	yes	-
chr4:32922243..32922297:-	1.6	ucgagaauugcguuuggacaa	guccagacucaacucucggcc	guccagacucaacucucggccagagccauagacucgagaauugcguuuggacaa	54 +/- 9%	11	11	0	0	yes	-
chr14:109970181..109970240:-	1.9	uggcaguggaguuagugauugu	aaucagcuaaugacacugccuac	uggcaguggaguuagugauuguaaccaccacaguacaaucagcuaaugacacugccuac	54 +/- 9%	5	5	0	0	yes	hsa-miR-34a-5p:MIMAT0000255
chrX:9574155..9574230:-	1	acagucacugucagagaag	cuuuugacaucucuguuu	acagucacugucagagaaggguccuucagguacauauugaauugccuggggaaagaccuuuugacaucucuguuu	54 +/- 9%	4	4	0	0	yes	hsa-miR-4704-3p:MIMAT0019804
chr13:75089548..75089609:+	1.2	uccugggcuuuggcagacagc	uguugagcugagcccagggug	uccugggcuuuggcagacagcucuuugccucucauacagcuguugagcugagcccagggug	54 +/- 9%	3	3	0	0	yes	hsa-miR-939-3p:MIMAT0022939
chr12:52619657..52619712:-	1	uaggccuuuagaucaucuaa	agaugagcuaaaggccuaua	uaggccuuuagaucaucuaaagaguauucaacauuagaugagcuaaaggccuaua	54 +/- 9%	3	3	0	0	yes	hsa-miR-3142:MIMAT0015011
chr19:13518242..13518302:+	1	guuccugcugaacugagccag	guguuucagcucaguaggcacgg	guuccugcugaacugagccagugugcacaaaccaacuguguuucagcucaguaggcacgg	54 +/- 9%	3	3	0	0	yes	hsa-miR-3074-5p:MIMAT0019208
chr9:123805384..123805425:+	0.6	aagcugccaguucaagaac	ucagggaucuggcacauca	ucagggaucuggcacaucagugaagcugccaguucaagaac	53 +/- 5%	19841	19841	0	0	yes	-
chr1:96517748..96517787:-	0.6	accgggugcuguaggcuu	gccugguuaguauuugggua	gccugguuaguauuuggguauaccgggugcuguaggcuu	53 +/- 5%	1430	1430	0	0	yes	-
chr19:59640358..59640412:+	0.9	cgucaauuacguuugcacuga	aaaaguaauugggguuuuugc	aaaaguaauugggguuuuugccauuaccuuuaacgucaauuacguuugcacuga	53 +/- 5%	145	139	0	6	yes	-
chr11:29889969..29890040:+	0	acuggauuuggagucagaagcc	uuuuuguggcaggauagaua	uuuuuguggcaggauagauaggaaacugcuuugguggaguggaaaaauaacuggauuuggagucagaagcc	53 +/- 5%	83	83	0	0	yes	-
chr2:32492880..32492933:+	0.8	cuggacuuggagccagaagac	uuacauucuggcuccacugucaucau	cuggacuuggagccagaagacccagguuuacauucuggcuccacugucaucau	53 +/- 5%	30	30	0	0	yes	-
chr20:47810070..47810152:-	0	aagagauggaacuuggguguga	ccacccccaggguuuguaucuuca	aagagauggaacuugggugugaggaggccuggaaaucuggguagccaacaaguauccuccacccccaggguuuguaucuuca	53 +/- 5%	13	13	0	0	yes	-
chr20:55999278..55999340:+	0.9	ugugggcauccagcucugcca	gccagcugcugugccacacagg	gccagcugcugugccacacaggaugagguucugucugugucugugggcauccagcucugcca	53 +/- 5%	10	10	0	0	yes	-
chr6:103295371..103295430:-	0.1	auaggaugaacacauuaauga	guuaauguguucauacuacaugu	guuaauguguucauacuacaugucuggcaugaacauacauaggaugaacacauuaauga	53 +/- 5%	10	10	0	0	yes	-
chr4:32922243..32922297:-	0.6	ucgagaauugcguuuggacaa	guccagacucaacucucggcc	guccagacucaacucucggccagagccauagacucgagaauugcguuuggacaa	53 +/- 5%	9	9	0	0	yes	-
chr2:87318808..87318882:+	0.5	cguucaccuccccuuaucccu	ggaaggagggaggggacagc	cguucaccuccccuuaucccuuguucuccucuucaggauggagcugaccucaagggaaggagggaggggacagc	53 +/- 5%	9	9	0	0	yes	-
chr2:117047798..117047855:-	0.2	caccccauccucuggccuuag	aaggccacgguaauugggguagc	caccccauccucuggccuuagcuguccugaaauuaaggccacgguaauugggguagc	53 +/- 5%	9	9	0	0	yes	-
chr11:112946430..112946487:-	0.1	uguguccuguuauuggugauu	ucaccaauaaugggacacuaa	ucaccaauaaugggacacuaaugugauucauguuguuguguccuguuauuggugauu	53 +/- 5%	8	8	0	0	yes	-
chr14:7894413..7894468:-	0	cucaacgccucuucuccccag	gggggccuggggcagggcauagga	gggggccuggggcagggcauaggaccuguggguccucaacgccucuucuccccag	53 +/- 5%	8	8	0	0	yes	-
chr6:96835784..96835846:+	0	acuggauccuagauaucugugc	acagaggucgggaaucagggu	acuggauccuagauaucugugcuacuuuuuucagucuaagcacagaggucgggaaucagggu	53 +/- 5%	8	8	0	0	yes	-
chr3:11689321..11689381:-	0.8	cucauauuuuguuuuacuucuc	gaaguugggccaaauaucaac	cucauauuuuguuuuacuucucuguuuuuaaaguaucaggaaguugggccaaauaucaac	53 +/- 5%	5	4	0	1	yes	-
chrX:79424104..79424164:-	0.7	cuucccuuguuuuagucaaag	uugacuaaaacaaaggaauaa	cuucccuuguuuuagucaaagcaaaguucuuuguuuucuuugacuaaaacaaaggaauaa	53 +/- 5%	4	4	0	0	yes	hsa-miR-4755-5p:MIMAT0019895
chr8:50415605..50415653:+	0.1	aaaagcuggguugagagga	uucucuuccugguucuucc	uucucuuccugguucuucccuaagucaggaaaagcuggguugagagga	53 +/- 5%	4	4	0	0	yes	hsa-miR-320a:MIMAT0000510
chr13:75089548..75089609:+	0.7	uccugggcuuuggcagacagc	uguugagcugagcccagggug	uccugggcuuuggcagacagcucuuugccucucauacagcuguugagcugagcccagggug	53 +/- 5%	2	2	0	0	yes	hsa-miR-939-3p:MIMAT0022939
chr2:84768326..84768390:-	0.7	aucccugacgcucgccggcaccg	ggccuccgagcggaggggaaac	aucccugacgcucgccggcaccggccgcacgcguucaugccgggccuccgagcggaggggaaac	53 +/- 5%	2	2	0	0	yes	hsa-miR-670:MIMAT0010357
chr5:146312253..146312316:+	0.5	ucuggacugagaauagauuga	aaucuaucuauucucaguccagagc	aaucuaucuauucucaguccagagcuccuucaccuagagaguucuggacugagaauagauuga	53 +/- 5%	2	2	0	0	yes	hsa-miR-378a-3p:MIMAT0000732
chr9:111967487..111967538:+	0.5	ccaaaccaguugugccug	ggcacagccgguuugagca	ggcacagccgguuugagcauuuuuacugaauugccaaaccaguugugccug	53 +/- 5%	2	2	0	0	yes	hsa-miR-6715a-3p:MIMAT0025841
chr1:167900970..167901052:+	0.4	uucccucuuuuaccccca	gggguagaggagcugccu	gggguagaggagcugccuagggguucugaugggccaugaaggagggucccauggcagggccacauucccucuuuuaccccca	53 +/- 5%	2	2	0	0	yes	hsa-miR-642a-5p:MIMAT0003312
chr9:97043599..97043651:+	0.4	ucacccuguagagaacac	guacuguacaggguuaaug	guacuguacaggguuaaugaccaccauuuuagcaucacccuguagagaacac	53 +/- 5%	2	2	0	0	yes	hsa-miR-3620-3p:MIMAT0018001
chr3:13010378..13010442:-	0.3	aguugccagggcugccuuugg	agagcagccugcgguaacagu	aguugccagggcugccuuuggugacagcagcaguagaguugccagagcagccugcgguaacagu	53 +/- 5%	2	2	0	0	yes	hsa-miR-6501-5p:MIMAT0025458
chr4:158187926..158187985:-	0.3	acugggcgugagcugucccaccac	ggugugaccucauucccaaggugg	acugggcgugagcugucccaccaccgugaugugauggugugaccucauucccaaggugg	53 +/- 5%	2	2	0	0	yes	hsa-miR-4486:MIMAT0019020
chr6:147766442..147766514:+	0.2	uuccugagucucuguacauaga	uaugggcagaggcucaggaagc	uaugggcagaggcucaggaagcuucauauugaagcucuaaacccucuagcuuccugagucucuguacauaga	53 +/- 5%	2	2	0	0	yes	hsa-miR-1200:MIMAT0005863
chr13:97408756..97408798:+	0.2	aacacaccaaggccgagggc	acucggcuucacucuguuuu	acucggcuucacucuguuuuuuaacacaccaaggccgagggc	53 +/- 5%	2	2	0	0	yes	hsa-miR-362-3p:MIMAT0004683
chr19:45067639..45067721:+	0	ugggcugggagcagcugcucacc	ggacaguucacagcgcccagcccaca	ggacaguucacagcgcccagcccacagucacaccccugucuucccgcagcacauucgcgugggcugggagcagcugcucacc	53 +/- 5%	2	2	0	0	yes	hsa-miR-762:MIMAT0010313
chr1:165750166..165750223:+	0	uucugagcuuagcuacuguu	caguaccuaagcucagaaag	caguaccuaagcucagaaaggucuaagacccuaugcuuucugagcuuagcuacuguu	53 +/- 5%	2	2	0	0	yes	hsa-miR-4303:MIMAT0016856
chr11:118159264..118159327:-	0	aaugguucugacaggaugggcag	gcccuccuacagcaccagugc	aaugguucugacaggaugggcaguccagaugccugagccccugcccuccuacagcaccagugc	53 +/- 5%	2	2	0	0	yes	hsa-miR-218-2-3p:MIMAT0004566
chr1:17505356..17505423:+	0.6	auggacuuggagucagaaggcu	cguucgggcuucagucccuuaaauua	cguucgggcuucagucccuuaaauuacccuucuuuggaaggaauaauggacuuggagucagaaggcu	50 +/- 5%	521	521	0	0	yes	-
