# Supplementary material for: Age-associated miRNA Alterations in Skeletal Muscle from Rhesus Monkeys reversed by caloric restriction
Source: Aging (Albany NY). 2013 Sep 9;5(9):692–703. doi: 10.18632/aging.100598 (PMC3808701; doi:10.18632/aging.100598)
Supplement: Supplementary file 4 [file aging-05-692-s004.xlsx]

## Sheet: miRNA_novel_all_read_counts_dif
ID	O12352	O17517	O192	O22383	O509	O652	Y1	Y3	Y33	Y64	pval	padj	baseMean	baseMeanA	baseMeanB	foldChange
chr20:3276171..3276212:+	0	0	0	0	0	0	0	0	0	0	NA	NA	0	0	0	NA
chr21:116366553..116366607:+	0	0	0	0	0	0	0	0	0	0	NA	NA	0	0	0	NA
chr21:118065500..118065567:-	0	0	0	0	0	0	0	0	0	0	NA	NA	0	0	0	NA
chr21:140873385..140873471:-	0	0	0	0	0	0	0	0	0	0	NA	NA	0	0	0	NA
chr21:144121480..144121529:-	0	0	0	0	0	0	0	0	0	0	NA	NA	0	0	0	NA
chr21:145374891..145374950:-	0	0	0	0	0	0	0	0	0	0	NA	NA	0	0	0	NA
chr21:15145582..15145642:+	0	0	0	0	0	0	0	0	0	0	NA	NA	0	0	0	NA
chr21:151801811..151801873:+	0	0	0	0	0	0	0	0	0	0	NA	NA	0	0	0	NA
chr21:152105082..152105151:+	0	0	0	0	0	0	0	0	0	0	NA	NA	0	0	0	NA
chr21:152473428..152473489:+	0	0	0	0	0	0	0	0	0	0	NA	NA	0	0	0	NA
chr21:17618695..17618757:-	0	0	0	0	0	0	0	0	0	0	NA	NA	0	0	0	NA
chr21:25075117..25075178:-	0	0	0	0	0	0	0	0	0	0	NA	NA	0	0	0	NA
chr21:36294278..36294342:+	0	0	0	0	0	0	0	0	0	0	NA	NA	0	0	0	NA
chr21:51519323..51519397:-	0	0	0	0	0	0	0	0	0	0	NA	NA	0	0	0	NA
chr21:54516593..54516633:+	0	0	0	0	0	0	0	0	0	0	NA	NA	0	0	0	NA
chr21:62639455..62639519:-	0	0	0	0	0	0	0	0	0	0	NA	NA	0	0	0	NA
chr21:67327501..67327587:-	0	0	0	0	0	0	0	0	0	0	NA	NA	0	0	0	NA
chr21:79424104..79424164:-	0	0	0	0	0	0	0	0	0	0	NA	NA	0	0	0	NA
chr21:9574155..9574230:-	0	0	0	0	0	0	0	0	0	0	NA	NA	0	0	0	NA
chr11:76906354..76906413:-	0	0	0	0	0	0	0	0	40	0	0.0554924	1	10.6609	0	26.6523	Inf
chr3:47373132..47373181:-	0	0	0	0	0	0	0	0	0	48	0.0652272	1	5.59837	0	13.9959	Inf
chr20:56916252..56916315:-	0	0	0	0	0	0	0	22	0	0	0.156172	1	3.04219	0	7.60549	Inf
chr9:118676410..118676469:-	0	0	0	0	0	0	0	18	0	0	0.188863	1	2.48907	0	6.22267	Inf
chr13:4020954..4021030:+	0	0	0	0	0	0	0	14	0	0	0.232223	1	1.93594	0	4.83986	Inf
chr13:4020999..4021075:+	0	0	0	0	0	0	0	14	0	0	0.232223	1	1.93594	0	4.83986	Inf
chr14:55319364..55319422:-	0	0	0	0	0	0	2	0	0	0	0.289866	1	0.18316	0	0.4579	Inf
chr19:56662177..56662257:+	0	0	0	0	0	0	2	0	0	0	0.289866	1	0.18316	0	0.4579	Inf
chr3:4407402..4407459:-	0	0	0	0	0	0	2	0	0	0	0.289866	1	0.18316	0	0.4579	Inf
chr7:155409882..155409944:+	0	0	0	0	0	0	2	0	0	0	0.289866	1	0.18316	0	0.4579	Inf
chr9:816782..816846:-	0	0	0	0	0	0	2	0	0	0	0.289866	1	0.18316	0	0.4579	Inf
chr19:54397787..54397829:+	0	0	0	0	0	0	0	0	0	9	0.304983	1	1.04969	0	2.62423	Inf
chr3:81456399..81456454:-	0	0	0	0	0	0	7	0	0	0	0.31619	1	0.641061	0	1.60265	Inf
chr3:44174834..44174894:-	0	0	0	0	0	0	3	0	0	0	0.326184	1	0.27474	0	0.686851	Inf
chr6:135690253..135690314:+	0	0	0	0	0	0	3	0	0	0	0.326184	1	0.27474	0	0.686851	Inf
chr11:84224795..84224872:-	0	0	0	0	0	0	0	0	0	2	0.399514	1	0.233265	0	0.583163	Inf
chr5:72847321..72847376:+	0	0	0	0	0	0	0	0	0	2	0.399514	1	0.233265	0	0.583163	Inf
chr6:169678784..169678860:+	0	0	0	0	0	0	0	0	0	2	0.399514	1	0.233265	0	0.583163	Inf
chr7:162743091..162743179:-	0	0	0	0	0	0	0	0	0	2	0.399514	1	0.233265	0	0.583163	Inf
chr8:146720351..146720420:+	0	0	0	0	0	0	0	0	0	2	0.399514	1	0.233265	0	0.583163	Inf
chr14:38921264..38921340:+	0	0	0	0	0	0	0	0	0	3	0.408417	1	0.349898	0	0.874745	Inf
chr16:33719592..33719634:+	0	0	0	0	0	0	0	0	0	3	0.408417	1	0.349898	0	0.874745	Inf
chr12:37847355..37847408:-	0	0	0	0	0	0	0	4	0	0	0.420631	1	0.553126	0	1.38282	Inf
chr11:7037590..7037655:+	0	0	0	0	0	0	0	0	0	1	0.512099	1	0.116633	0	0.291582	Inf
chr14:7208642..7208731:-	0	0	0	0	0	0	0	0	0	1	0.512099	1	0.116633	0	0.291582	Inf
chr14:8374353..8374410:-	0	0	0	0	0	0	0	0	0	1	0.512099	1	0.116633	0	0.291582	Inf
chr15:72531828..72531868:-	0	0	0	0	0	0	0	0	0	1	0.512099	1	0.116633	0	0.291582	Inf
chr15:98695232..98695305:-	0	0	0	0	0	0	0	0	0	1	0.512099	1	0.116633	0	0.291582	Inf
chr16:17730381..17730439:-	0	0	0	0	0	0	0	0	0	1	0.512099	1	0.116633	0	0.291582	Inf
chr16:1854846..1854914:+	0	0	0	0	0	0	0	0	0	1	0.512099	1	0.116633	0	0.291582	Inf
chr19:45132566..45132617:-	0	0	0	0	0	0	0	0	0	1	0.512099	1	0.116633	0	0.291582	Inf
chr2:127233431..127233487:+	0	0	0	0	0	0	0	0	0	1	0.512099	1	0.116633	0	0.291582	Inf
chr2:166405705..166405741:-	0	0	0	0	0	0	0	0	0	1	0.512099	1	0.116633	0	0.291582	Inf
chr20:2230312..2230352:+	0	0	0	0	0	0	0	0	0	1	0.512099	1	0.116633	0	0.291582	Inf
chr4:139758445..139758508:-	0	0	0	0	0	0	0	0	0	1	0.512099	1	0.116633	0	0.291582	Inf
chr8:143937951..143938014:-	0	0	0	0	0	0	0	0	0	1	0.512099	1	0.116633	0	0.291582	Inf
chr8:19421211..19421284:-	0	0	0	0	0	0	0	0	0	1	0.512099	1	0.116633	0	0.291582	Inf
chr8:92649055..92649124:-	0	0	0	0	0	0	0	0	0	1	0.512099	1	0.116633	0	0.291582	Inf
chr8:92649100..92649177:-	0	0	0	0	0	0	0	0	0	1	0.512099	1	0.116633	0	0.291582	Inf
chr1:112589381..112589438:+	0	0	0	0	0	0	1	0	0	0	0.512099	1	0.0915801	0	0.22895	Inf
chr1:123224009..123224064:-	0	0	0	0	0	0	1	0	0	0	0.512099	1	0.0915801	0	0.22895	Inf
chr1:160647625..160647695:+	0	0	0	0	0	0	1	0	0	0	0.512099	1	0.0915801	0	0.22895	Inf
chr10:79247283..79247344:+	0	0	0	0	0	0	1	0	0	0	0.512099	1	0.0915801	0	0.22895	Inf
chr13:45768837..45768883:+	0	0	0	0	0	0	1	0	0	0	0.512099	1	0.0915801	0	0.22895	Inf
chr14:123008667..123008729:-	0	0	0	0	0	0	1	0	0	0	0.512099	1	0.0915801	0	0.22895	Inf
chr14:76266237..76266286:-	0	0	0	0	0	0	1	0	0	0	0.512099	1	0.0915801	0	0.22895	Inf
chr16:34777261..34777319:-	0	0	0	0	0	0	1	0	0	0	0.512099	1	0.0915801	0	0.22895	Inf
chr16:76568325..76568408:-	0	0	0	0	0	0	1	0	0	0	0.512099	1	0.0915801	0	0.22895	Inf
chr20:20741936..20741991:+	0	0	0	0	0	0	1	0	0	0	0.512099	1	0.0915801	0	0.22895	Inf
chr20:66604648..66604713:+	0	0	0	0	0	0	1	0	0	0	0.512099	1	0.0915801	0	0.22895	Inf
chr5:63114198..63114255:-	0	0	0	0	0	0	1	0	0	0	0.512099	1	0.0915801	0	0.22895	Inf
chr8:23344142..23344209:-	0	0	0	0	0	0	1	0	0	0	0.512099	1	0.0915801	0	0.22895	Inf
chr9:57772673..57772735:-	0	0	0	0	0	0	1	0	0	0	0.512099	1	0.0915801	0	0.22895	Inf
chr10:83327870..83327939:+	0	0	0	0	0	0	0	1	0	0	0.543737	1	0.138282	0	0.345704	Inf
chr10:84921897..84921949:+	0	0	0	0	0	0	0	1	0	0	0.543737	1	0.138282	0	0.345704	Inf
chr14:117726284..117726344:-	0	0	0	0	0	0	0	1	0	0	0.543737	1	0.138282	0	0.345704	Inf
chr14:6835223..6835279:+	0	0	0	0	0	0	0	1	0	0	0.543737	1	0.138282	0	0.345704	Inf
chr19:45005125..45005187:+	0	0	0	0	0	0	0	1	0	0	0.543737	1	0.138282	0	0.345704	Inf
chr3:166162901..166162970:+	0	0	0	0	0	0	0	1	0	0	0.543737	1	0.138282	0	0.345704	Inf
chr4:105989897..105989948:-	0	0	0	0	0	0	0	1	0	0	0.543737	1	0.138282	0	0.345704	Inf
chr4:26148333..26148400:+	0	0	0	0	0	0	0	1	0	0	0.543737	1	0.138282	0	0.345704	Inf
chr7:79149797..79149871:+	0	0	0	0	0	0	0	1	0	0	0.543737	1	0.138282	0	0.345704	Inf
chr13:63862324..63862382:-	0	0	0	0	0	0	0	0	2	0	0.592807	1	0.533047	0	1.33262	Inf
chr19:44843913..44843961:+	0	0	0	0	0	0	0	0	2	0	0.592807	1	0.533047	0	1.33262	Inf
chr16:17416097..17416154:+	0	0	0	0	0	0	0	0	1	0	0.73997	1	0.266523	0	0.666308	Inf
chr19:53556528..53556575:-	0	0	0	0	0	0	0	0	1	0	0.73997	1	0.266523	0	0.666308	Inf
chr5:52513596..52513654:+	0	0	0	0	0	0	0	0	1	0	0.73997	1	0.266523	0	0.666308	Inf
chr5:76727709..76727790:-	0	0	0	0	0	0	0	0	1	0	0.73997	1	0.266523	0	0.666308	Inf
chr6:130948644..130948707:-	0	0	0	0	0	0	0	0	1	0	0.73997	1	0.266523	0	0.666308	Inf
chr16:1525341..1525408:+	0	0	1	0	0	0	0	2	0	0	0.675258	1	0.335567	0.0983399	0.691408	7.0308
chr1:48529707..48529767:-	0	0	0	0	1	0	0	1	0	0	0.902176	1	0.179221	0.0682322	0.345704	5.06658
chr16:49761736..49761810:+	0	0	1	0	0	0	2	0	0	0	0.579241	1	0.242164	0.0983399	0.4579	4.6563
chr15:10478591..10478655:-	0	0	0	0	3	0	0	0	0	3	0.712531	1	0.472716	0.204697	0.874745	4.27337
chr8:146751538..146751607:-	0	0	3	0	0	0	0	0	0	4	0.672503	1	0.643542	0.29502	1.16633	3.95338
chr17:35647636..35647706:-	27	0	0	0	0	96	75	30	46	0	0.432818	1	32.3828	15.1763	58.1926	3.83443
chr4:113453286..113453356:+	27	0	0	0	0	96	75	30	46	0	0.432818	1	32.3828	15.1763	58.1926	3.83443
chr14:7902219..7902284:-	0	0	0	0	11	0	0	8	0	0	0.731463	1	1.55659	0.750554	2.76563	3.68479
chr10:67850046..67850102:+	22	0	15	0	0	50	59	0	30	20	0.454143	1	22.2669	10.8922	39.3289	3.61075
chr15:41836288..41836351:+	2	0	0	0	0	0	0	0	2	0	0.851534	1	0.761743	0.381161	1.33262	3.49621
chr10:2472512..2472579:-	0	0	0	2	0	0	0	0	0	2	0.752815	1	0.339138	0.176455	0.583163	3.30488
chr12:82680493..82680557:-	1	0	0	1	0	0	0	0	0	3	0.685763	1	0.517183	0.278808	0.874745	3.13744
chr9:67567377..67567444:-	3	0	17	0	12	0	7	6	6	5	0.695275	1	5.49044	3.06231	9.13263	2.98227
chr16:41110465..41110525:-	0	0	1	0	0	0	0	0	0	1	0.900345	1	0.175637	0.0983399	0.291582	2.96504
chr2:50831105..50831154:+	0	0	1	0	0	0	0	0	0	1	0.900345	1	0.175637	0.0983399	0.291582	2.96504
chr3:123916880..123916937:-	0	0	0	4	0	0	4	0	0	0	0.683047	1	0.578067	0.352911	0.915801	2.59499
chr14:8979130..8979179:-	0	0	0	2	0	0	2	0	0	0	0.71583	1	0.289033	0.176455	0.4579	2.59499
chr14:1908091..1908145:+	0	0	1	0	0	0	1	0	0	0	0.889579	1	0.150584	0.0983399	0.22895	2.32815
chr13:75089548..75089609:+	2	0	0	6	2	3	5	3	1	1	0.722605	1	2.07217	1.36045	3.13975	2.30788
chr15:1147236..1147297:-	0	0	0	9	0	0	8	0	0	0	0.670418	1	1.20907	0.794049	1.8316	2.30666
chr7:163376692..163376752:-	3368	0	6952	0	0	6043	4645	3004	1806	3639	0.111535	1	2920.72	1956.94	4366.39	2.23123
chr1:17505356..17505423:+	507	0	0	521	0	1128	468	467	262	398	0.394308	1	379.957	260.451	559.215	2.1471
chr12:52619657..52619712:-	1	0	0	0	0	3	0	3	0	0	0.807603	1	0.717268	0.504039	1.03711	2.0576
chr3:13010378..13010442:-	0	0	2	0	2	0	0	0	1	0	1	1	0.46641	0.333144	0.666308	2.00006
chr10:29091320..29091386:+	0	0	11	0	0	14	8	0	0	9	0.700719	1	3.30906	2.54455	4.45584	1.75113
chr20:87818449..87818510:+	0	0	24	0	0	0	0	0	6	0	1	1	3.01523	2.36016	3.99785	1.69389
chr10:83327878..83327931:+	0	0	0	0	2	0	1	0	0	0	1	1	0.173459	0.136464	0.22895	1.67773
chr14:8864887..8864952:-	0	0	0	2	0	0	0	0	0	1	1	1	0.222506	0.176455	0.291582	1.65244
chr15:4088778..4088844:-	0	0	2	1	2	0	3	0	0	0	0.779624	1	0.527563	0.421372	0.686851	1.63003
chr2:32492880..32492933:+	17	0	27	13	30	39	23	10	12	16	0.781919	1	16.4519	13.1639	21.3839	1.62443
chr18:6923491..6923553:+	113	66	373	626	137	373	340	141	155	281	0.616041	1	240.168	192.413	311.8	1.62047
chr1:201833034..201833097:+	0	0	2	2	1	0	3	0	0	0	0.783965	1	0.539561	0.441367	0.686851	1.55619
chr18:29631715..29631773:+	0	0	3	0	0	0	2	0	0	0	0.807026	1	0.360172	0.29502	0.4579	1.5521
chr7:138904276..138904337:+	0	0	3	0	0	0	2	0	0	0	0.807026	1	0.360172	0.29502	0.4579	1.5521
chr1:212022327..212022385:-	26	0	102	51	0	87	37	40	20	29	0.774365	1	34.7779	28.5757	44.0813	1.54262
chr9:102037434..102037488:+	1	0	0	0	0	0	0	0	0	1	0.925783	1	0.230981	0.19058	0.291582	1.52997
chr2:101860128..101860172:-	7	0	8	5	10	7	9	0	3	4	0.838919	1	4.47571	3.97565	5.2258	1.31445
chr16:18891355..18891409:-	99	69	179	460	305	223	244	98	81	170	0.763509	1	169.236	153.205	193.283	1.2616
chr8:96489951..96490009:-	8036	2792	12791	11246	12775	14352	8474	4593	4664	7376	0.737787	1	7984.06	7449.23	8786.31	1.17949
chr17:90323138..90323199:-	0	0	5	4	10	0	1	2	0	3	1	1	1.6342	1.52693	1.7951	1.17563
chr16:56897246..56897302:+	11	9	41	50	74	70	21	42	7	26	0.867724	1	28.8782	27.0818	31.5728	1.16583
chr16:63341749..63341805:-	11	9	41	50	74	70	21	42	7	26	0.867724	1	28.8782	27.0818	31.5728	1.16583
chr6:85254273..85254330:+	0	0	0	359	0	0	161	0	0	0	0.681919	1	33.7486	31.6737	36.861	1.16377
chr2:40118461..40118523:-	260	106	458	536	728	396	379	215	138	246	0.841016	1	299.2	282.149	324.778	1.15109
chr9:103084714..103084773:-	780	162	0	1535	0	953	880	486	0	511	0.552429	1	482.721	458.878	518.486	1.1299
chr9:53379321..53379396:-	0	0	163	0	0	230	20	110	0	0	1	1	41.0793	40.0612	42.6064	1.06353
chr9:123805384..123805425:+	0	2257	15045	17232	19841	16861	10209	0	4236	7729	0.913762	1	7263.42	7163.38	7413.47	1.03491
chr20:87818411..87818469:+	12	0	34	24	37	21	12	4	7	13	1	1	12.514	12.4668	12.5849	1.00948
chr10:64151927..64151986:+	26	6	30	36	18	26	18	10	10	12	0.934624	1	17.7834	17.8123	17.7402	0.995955
chr9:99144420..99144457:+	0	0	52	36	57	43	23	20	0	15	1	1	16.6247	16.672	16.5537	0.992901
chr3:176724097..176724153:-	49	18	246	259	346	149	121	92	27	83	1	1	103.029	103.916	101.699	0.978672
chr14:109970181..109970240:-	14	0	16	28	0	5	12	4	2	5	0.884806	1	7.10892	7.23437	6.92074	0.956648
chr1:213763515..213763574:-	12	0	17	34	20	30	6	6	6	11	1	1	11.1359	11.4577	10.6532	0.929782
chr8:1902655..1902719:+	6	0	0	9	0	0	5	0	0	2	0.83754	1	1.85368	1.93753	1.72791	0.891812
chr13:26638811..26638859:-	29	0	47	37	58	64	31	21	0	24	1	1	22.9768	24.0578	21.3552	0.887662
chr12:91013998..91014057:-	0	0	0	22	18	0	0	3	0	6	1	1	3.01615	3.16919	2.7866	0.879279
chr2:139320934..139320997:-	0	0	0	45	0	0	15	0	0	0	1	1	3.75585	3.97024	3.43425	0.864998
chr3:21758853..21758909:-	0	0	0	44	0	0	14	0	0	0	1	1	3.61133	3.88202	3.2053	0.82568
chr18:51716515..51716573:-	14	7	44	14	23	20	29	9	2	4	0.894815	1	13.9837	15.1396	12.2498	0.809125
chr16:11829814..11829892:+	148	58	305	216	319	187	117	82	49	91	0.897653	1	133.023	145.493	114.318	0.78573
chr16:72424817..72424880:+	4	0	0	0	0	0	0	0	0	2	0.926243	1	0.690658	0.762322	0.583163	0.764983
chr11:66573296..66573356:-	3	0	0	0	5	0	0	0	1	0	0.997712	1	0.814265	0.912902	0.666308	0.729879
chr2:19051377..19051440:-	0	0	17	247	0	0	74	0	0	0	1	1	20.8553	23.464	16.9423	0.722056
chr16:59542464..59542528:-	14	7	21	5	7	14	7	9	0	9	0.926456	1	9.15435	10.3651	7.33822	0.707973
chr1:13052429..13052487:+	0	0	4	3	5	0	3	0	0	0	1	1	0.874262	0.999204	0.686851	0.687398
chr1:199922779..199922824:+	4	0	3	0	0	16	0	0	0	6	1	1	2.33727	2.72912	1.74949	0.641045
chr3:189830110..189830198:-	211	0	168	57	0	267	17	0	18	139	0.849552	1	76.3624	89.6603	56.4155	0.629214
chr7:164309589..164309643:-	2	1	1	1	0	1	3	0	0	0	0.889814	1	0.956664	1.13654	0.686851	0.604335
chr3:189815411..189815469:+	76	0	219	325	432	0	118	86	0	0	0.83306	1	79.2012	94.1708	56.7467	0.602593
chr19:59640352..59640412:+	36	11	77	108	145	43	26	32	0	27	0.865553	1	36.0287	43.4558	24.8879	0.572718
chr15:31479650..31479716:+	11	0	0	15	11	0	0	0	0	8	1	1	3.43527	4.17035	2.33265	0.559342
chr10:84714589..84714645:-	33	22	51	62	115	48	22	26	6	14	0.832422	1	32.7532	39.8518	22.1052	0.554685
chr2:179144831..179144887:+	0	0	12	25	0	14	0	0	0	9	0.984556	1	3.95884	4.84858	2.62423	0.541238
chr14:70119266..70119323:-	0	0	34	0	0	0	7	0	0	0	1	1	2.6472	3.34356	1.60265	0.479325
chr4:32922243..32922297:-	13	0	11	19	9	11	0	0	0	11	0.933562	1	5.48239	6.99905	3.2074	0.458262
chr13:62933909..62933968:+	14	0	33	11	19	29	8	9	0	0	0.88271	1	8.70339	11.2104	4.94294	0.440926
chr5:151294973..151295038:+	2	0	0	0	0	4	0	1	0	0	1	1	0.617745	0.799105	0.345704	0.432614
chr9:97043594..97043656:+	17	0	52	88	41	39	28	0	0	12	0.873515	1	17.7579	22.9901	9.90959	0.431038
chr4:2595466..2595525:-	0	0	2	0	11	2	2	0	0	0	1	1	0.876884	1.15621	0.4579	0.396037
chr9:125976485..125976543:-	17	9	40	20	7	31	10	5	0	7	0.840864	1	12.5238	16.8336	6.05909	0.35994
chr4:110159736..110159794:-	0	0	0	0	16	14	0	0	0	3	0.937127	1	1.88261	2.55452	0.874745	0.34243
chr3:56592609..56592661:-	0	0	10	10	17	10	2	0	0	3	0.907293	1	2.97535	4.07048	1.33265	0.327392
chr17:28813574..28813632:-	88	28	100	80	93	103	0	18	11	15	0.432187	1	45.4335	63.7721	17.9258	0.281092
chr10:84006376..84006433:+	7	6	0	32	23	4	10	0	0	0	0.847426	1	6.27415	8.93058	2.2895	0.256366
chr11:29889969..29890040:+	55	20	121	0	83	106	0	0	0	40	0.543378	1	33.7091	48.4064	11.6633	0.240945
chr11:105706123..105706189:+	5	0	12	3	30	12	0	1	1	1	0.688105	1	3.94052	5.69846	1.30359	0.228762
chr20:47810129..47810198:-	0	3	8	11	13	0	4	0	0	0	0.888711	1	2.78865	4.03722	0.915801	0.22684
chr7:164844828..164844886:-	11	0	0	115	10	15	14	0	0	0	0.730175	1	9.97743	14.4922	3.2053	0.221175
chr6:167769227..167769281:-	5	0	4	9	7	6	0	0	1	0	0.705098	1	2.21343	3.24485	0.666308	0.205343
chr6:96835783..96835847:+	0	0	0	31	8	0	0	0	1	0	0.693882	1	2.23507	3.28091	0.666308	0.203086
chr13:101252003..101252085:+	2	0	17	0	0	0	0	1	0	0	0.84309	1	1.37005	2.05294	0.345704	0.168395
chr1:205580546..205580606:-	32	9	50	42	69	40	17	0	0	0	0.528159	1	18.2294	27.7875	3.89215	0.140068
chr9:64236493..64236550:-	8	0	0	9	5	0	0	1	0	0	0.783046	1	1.73419	2.65985	0.345704	0.129971
chr12:41976864..41976919:+	22	0	17	28	39	16	7	0	0	0	0.609053	1	8.24171	12.6678	1.60265	0.126514
chr20:78265916..78265983:+	109	0	119	0	0	203	22	0	0	0	0.330141	1	34.2266	53.6864	5.03691	0.0938209
chr10:78360529..78360586:+	3767	0	4776	0	0	0	0	0	0	0	5.61706e-10	2.58385e-07	712.553	1187.59	0	0
chr15:24915238..24915294:+	85	0	136	696	232	13	0	0	0	0	0.00334943	0.662284	64.9009	108.168	0	0
chr1:96517748..96517787:-	0	0	0	0	1430	0	0	0	0	0	0.00431924	0.662284	58.5432	97.572	0	0
chr7:155788602..155788677:-	0	240	0	0	0	0	0	0	0	0	0.00828832	0.918241	66.8628	111.438	0	0
chr14:75755622..75755687:-	0	0	0	450	0	338	0	0	0	0	0.00998088	0.918241	45.0113	75.0188	0	0
chr4:26295490..26295543:-	0	0	0	0	0	662	0	0	0	0	0.0126505	0.969869	41.5019	69.1698	0	0
chr2:174977471..174977532:-	0	0	0	317	428	0	0	0	0	0	0.0188471	1	34.3029	57.1715	0	0
chr19:23155989..23156044:-	82	0	108	0	136	189	0	0	0	0	0.0218524	1	33.1655	55.2758	0	0
chr12:105723427..105723493:+	100	0	27	314	59	0	0	0	0	0	0.0235532	1	32.0654	53.4424	0	0
chr6:3094841..3094896:+	281	0	0	0	0	0	0	0	0	0	0.0286095	1	32.1319	53.5531	0	0
chr15:15619720..15619788:+	22	87	15	0	111	14	0	0	0	0	0.0288332	1	33.0604	55.1007	0	0
chr6:113492585..113492643:+	0	0	0	0	397	0	0	0	0	0	0.0799411	1	16.2529	27.0882	0	0
chr1:222050321..222050380:+	30	0	91	0	60	74	0	0	0	0	0.0866764	1	15.8954	26.4923	0	0
chr5:95158258..95158318:-	0	0	0	289	0	0	0	0	0	0	0.089793	1	15.2987	25.4978	0	0
chr10:89230947..89230989:-	0	63	0	0	0	0	0	0	0	0	0.126198	1	17.5515	29.2525	0	0
chr12:33451867..33451931:+	0	0	0	209	0	0	0	0	0	0	0.140152	1	11.0637	18.4396	0	0
chr12:42369965..42370028:-	0	0	172	0	0	0	0	0	0	0	0.157262	1	10.1487	16.9145	0	0
chr2:39064942..39065002:-	22	7	22	56	0	23	0	0	0	0	0.163386	1	10.1703	16.9505	0	0
chr15:78189797..78189834:+	76	0	0	0	0	0	0	0	0	0	0.210107	1	8.69047	14.4841	0	0
chr1:180297397..180297466:+	0	0	0	91	65	0	0	0	0	0	0.215254	1	7.47828	12.4638	0	0
chr16:24273082..24273139:-	63	0	0	0	0	0	0	0	0	0	0.251916	1	7.20394	12.0066	0	0
chr5:30881924..30881985:-	0	0	20	59	48	0	0	0	0	0	0.254904	1	6.26842	10.4474	0	0
chr14:72822792..72822839:+	0	0	67	0	51	0	0	0	0	0	0.263947	1	6.04117	10.0686	0	0
chr16:77114927..77115011:-	0	0	101	0	0	0	0	0	0	0	0.26961	1	5.9594	9.93233	0	0
chr2:159384107..159384167:-	0	0	25	23	23	25	0	0	0	0	0.300818	1	5.20154	8.66923	0	0
chr2:50553483..50553564:+	0	0	84	0	0	0	0	0	0	0	0.3145	1	4.95633	8.26055	0	0
chr2:107569798..107569851:+	0	0	0	0	91	0	0	0	0	0	0.385845	1	3.72548	6.20913	0	0
chr4:146792635..146792684:+	0	0	0	0	90	0	0	0	0	0	0.388882	1	3.68454	6.1409	0	0
chr12:88134550..88134615:-	0	18	0	0	0	0	0	0	0	0	0.430335	1	5.01471	8.35785	0	0
chr3:176527467..176527525:-	0	0	14	20	0	19	0	0	0	0	0.441905	1	3.07593	5.12655	0	0
chr7:132931859..132931907:+	18	0	19	0	0	0	0	0	0	0	0.447553	1	3.17934	5.29891	0	0
chr3:9554566..9554624:+	17	0	0	0	15	8	0	0	0	0	0.452567	1	3.05954	5.09924	0	0
chr7:37664521..37664572:-	11	0	17	0	14	0	0	0	0	0	0.469073	1	2.83405	4.72341	0	0
chr2:189418374..189418433:+	0	0	19	0	33	0	0	0	0	0	0.500737	1	2.47207	4.12012	0	0
chr11:43532169..43532230:+	8	0	0	30	0	0	0	0	0	0	0.503069	1	2.50288	4.17147	0	0
chr3:167134029..167134093:+	0	0	0	46	0	0	0	0	0	0	0.505779	1	2.43508	4.05847	0	0
chr14:77189313..77189372:+	24	0	0	0	0	0	0	0	0	0	0.508581	1	2.74436	4.57393	0	0
chr4:63704720..63704765:-	10	0	0	25	0	0	0	0	0	0	0.50954	1	2.4669	4.11149	0	0
chr13:70772282..70772348:+	0	0	0	44	0	0	0	0	0	0	0.518149	1	2.32921	3.88202	0	0
chr1:45801667..45801720:+	0	0	12	0	19	13	0	0	0	0	0.521399	1	2.30089	3.83481	0	0
chr19:44838431..44838484:+	0	13	0	0	0	0	0	0	0	0	0.527928	1	3.62174	6.03623	0	0
chr3:4476594..4476643:-	22	0	0	0	0	0	0	0	0	0	0.5334	1	2.51566	4.19277	0	0
chr8:128128281..128128334:+	0	0	0	0	52	0	0	0	0	0	0.543078	1	2.12884	3.54807	0	0
chr14:94546886..94546938:-	0	0	0	0	51	0	0	0	0	0	0.548437	1	2.08791	3.47984	0	0
chr10:80239560..80239621:-	0	0	35	0	0	0	0	0	0	0	0.553104	1	2.06514	3.4419	0	0
chr3:4476595..4476674:-	0	0	12	0	0	18	0	0	0	0	0.585507	1	1.8365	3.06083	0	0
chr3:283196..283255:-	0	0	9	0	12	11	0	0	0	0	0.60139	1	1.71192	2.85319	0	0
chr15:38068457..38068539:-	0	10	0	0	0	0	0	0	0	0	0.608535	1	2.78595	4.64325	0	0
chr2:189095822..189095879:+	0	0	9	0	27	0	0	0	0	0	0.612516	1	1.6364	2.72733	0	0
chr7:20273425..20273492:+	0	0	2	20	8	0	0	0	0	0	0.63379	1	1.50425	2.50709	0	0
chr10:80038507..80038567:-	0	0	0	28	0	0	0	0	0	0	0.637858	1	1.48222	2.47037	0	0
chr10:80038547..80038603:-	0	0	0	28	0	0	0	0	0	0	0.637858	1	1.48222	2.47037	0	0
chr8:37403745..37403794:+	0	9	0	0	0	0	0	0	0	0	0.640554	1	2.50736	4.17893	0	0
chr9:125405380..125405458:+	0	9	0	0	0	0	0	0	0	0	0.640554	1	2.50736	4.17893	0	0
chr2:87318808..87318882:+	0	0	0	9	9	9	0	0	0	0	0.650122	1	1.40911	2.34851	0	0
chr8:109369882..109369940:+	14	0	0	0	0	0	0	0	0	0	0.657186	1	1.60088	2.66813	0	0
chr6:103295371..103295430:-	0	0	0	18	10	0	0	0	0	0	0.657934	1	1.36225	2.27042	0	0
chr6:140789268..140789336:+	9	0	0	0	8	0	0	0	0	0	0.672796	1	1.35665	2.26108	0	0
chr16:63179063..63179131:-	0	0	0	0	0	20	0	0	0	0	0.681229	1	1.25383	2.08972	0	0
chr3:172982712..172982770:-	0	0	0	23	0	0	0	0	0	0	0.684607	1	1.21754	2.02924	0	0
chr4:95368101..95368155:+	0	0	11	0	0	9	0	0	0	0	0.687861	1	1.21327	2.02211	0	0
chr5:26247110..26247168:-	0	0	0	0	29	0	0	0	0	0	0.691438	1	1.18724	1.97873	0	0
chr19:55429831..55429885:-	0	0	0	0	15	9	0	0	0	0	0.691536	1	1.17832	1.96386	0	0
chr10:88062438..88062494:-	0	0	20	0	0	0	0	0	0	0	0.693449	1	1.18008	1.9668	0	0
chr2:33609266..33609322:-	0	0	20	0	0	0	0	0	0	0	0.693449	1	1.18008	1.9668	0	0
chr12:13829208..13829286:+	4	0	0	14	0	0	0	0	0	0	0.693521	1	1.19851	1.99751	0	0
chr7:119843137..119843195:-	12	0	0	0	0	0	0	0	0	0	0.696153	1	1.37218	2.28696	0	0
chr18:14675846..14675894:+	0	0	12	7	0	0	0	0	0	0	0.712329	1	1.0786	1.79767	0	0
chr5:5091273..5091338:-	0	0	0	20	0	0	0	0	0	0	0.715247	1	1.05873	1.76455	0	0
chr7:99154942..99154997:+	0	0	0	20	0	0	0	0	0	0	0.715247	1	1.05873	1.76455	0	0
chr11:75794211..75794266:-	0	0	0	0	25	0	0	0	0	0	0.723467	1	1.02348	1.7058	0	0
chr12:35075131..35075195:-	0	0	0	0	11	9	0	0	0	0	0.723774	1	1.01456	1.69093	0	0
chr9:31903226..31903286:+	0	0	0	19	0	0	0	0	0	0	0.725912	1	1.0058	1.67633	0	0
chr2:75873991..75874048:+	0	0	17	0	0	0	0	0	0	0	0.728358	1	1.00307	1.67178	0	0
chr1:120066849..120066909:-	6	0	0	6	1	0	0	0	0	0	0.732617	1	1.04465	1.74108	0	0
chr11:112946430..112946487:-	0	0	0	12	8	0	0	0	0	0	0.734226	1	0.962753	1.60459	0	0
chr15:106899507..106899566:-	0	0	6	0	10	3	0	0	0	0	0.736644	1	0.951492	1.58582	0	0
chr10:87993366..87993426:+	0	0	0	7	14	0	0	0	0	0	0.738468	1	0.943706	1.57284	0	0
chr12:65415275..65415327:-	3	0	4	6	1	0	0	0	0	0	0.745986	1	0.937619	1.5627	0	0
chr3:100688605..100688663:+	0	0	0	17	0	0	0	0	0	0	0.747918	1	0.899922	1.49987	0	0
chr5:172858268..172858327:-	0	0	0	17	0	0	0	0	0	0	0.747918	1	0.899922	1.49987	0	0
chr12:90414201..90414262:+	0	0	0	16	0	0	0	0	0	0	0.759255	1	0.846985	1.41164	0	0
chr17:75978336..75978394:-	0	0	0	16	0	0	0	0	0	0	0.759255	1	0.846985	1.41164	0	0
chr9:6438081..6438147:+	0	0	0	16	0	0	0	0	0	0	0.759255	1	0.846985	1.41164	0	0
chr6:85262494..85262557:+	0	0	6	9	0	0	0	0	0	0	0.763556	1	0.830453	1.38409	0	0
chr2:107041441..107041500:-	0	0	0	0	0	13	0	0	0	0	0.770235	1	0.814992	1.35832	0	0
chr7:64116256..64116318:-	0	0	0	15	0	0	0	0	0	0	0.770941	1	0.794049	1.32341	0	0
chr3:95309196..95309260:+	0	0	0	0	19	0	0	0	0	0	0.775287	1	0.777847	1.29641	0	0
chr4:102370143..102370202:+	0	0	13	0	0	0	0	0	0	0	0.779303	1	0.767051	1.27842	0	0
chr3:167133810..167133874:+	2	0	2	8	0	0	0	0	0	0	0.78132	1	0.770197	1.28366	0	0
chr1:67829475..67829540:-	3	0	0	8	0	0	0	0	0	0	0.785698	1	0.766537	1.27756	0	0
chr11:84199803..84199859:-	0	0	6	0	0	6	0	0	0	0	0.78887	1	0.730174	1.21696	0	0
chr12:71858145..71858199:-	0	0	0	0	17	0	0	0	0	0	0.793997	1	0.695968	1.15995	0	0
chr11:45212699..45212767:+	0	0	0	13	0	0	0	0	0	0	0.795569	1	0.688176	1.14696	0	0
chr7:20411433..20411490:-	0	0	10	2	0	0	0	0	0	0	0.795666	1	0.695913	1.15985	0	0
chr8:99213608..99213663:+	1	0	4	3	4	0	0	0	0	0	0.80041	1	0.672931	1.12155	0	0
chr11:99295969..99296040:-	0	0	11	0	0	0	0	0	0	0	0.807729	1	0.649043	1.08174	0	0
chr12:85389055..85389113:-	0	0	0	12	0	0	0	0	0	0	0.808528	1	0.635239	1.05873	0	0
chr15:50337260..50337321:+	0	0	0	12	0	0	0	0	0	0	0.808528	1	0.635239	1.05873	0	0
chr3:93319819..93319883:+	0	0	0	12	0	0	0	0	0	0	0.808528	1	0.635239	1.05873	0	0
chr8:11661529..11661591:-	7	0	0	0	0	0	0	0	0	0	0.815014	1	0.800438	1.33406	0	0
chr12:83406811..83406876:-	0	0	0	11	0	0	0	0	0	0	0.821913	1	0.582302	0.970504	0	0
chr3:47870164..47870241:-	0	0	0	11	0	0	0	0	0	0	0.821913	1	0.582302	0.970504	0	0
chr3:90592517..90592581:+	0	0	0	11	0	0	0	0	0	0	0.821913	1	0.582302	0.970504	0	0
chr5:120882665..120882724:-	0	0	0	11	0	0	0	0	0	0	0.821913	1	0.582302	0.970504	0	0
chr3:101595705..101595771:-	0	0	0	0	3	0	0	0	0	0	0.823497	1	0.122818	0.204697	0	0
chr12:90626365..90626428:-	0	0	6	0	5	0	0	0	0	0	0.827243	1	0.55872	0.931201	0	0
chr16:74155004..74155054:+	0	0	0	0	0	9	0	0	0	0	0.832056	1	0.564225	0.940376	0	0
chr20:47810070..47810152:-	0	0	0	0	13	0	0	0	0	0	0.833595	1	0.532211	0.887019	0	0
chr6:92974949..92975008:-	0	0	0	0	13	0	0	0	0	0	0.833595	1	0.532211	0.887019	0	0
chr1:192038893..192038945:-	0	0	0	10	0	0	0	0	0	0	0.835697	1	0.529366	0.882276	0	0
chr11:105545325..105545387:+	0	0	0	10	0	0	0	0	0	0	0.835697	1	0.529366	0.882276	0	0
chr3:85799460..85799515:-	0	0	0	10	0	0	0	0	0	0	0.835697	1	0.529366	0.882276	0	0
chr9:59172735..59172794:+	0	0	0	10	0	0	0	0	0	0	0.835697	1	0.529366	0.882276	0	0
chr13:70054656..70054719:+	0	0	9	0	0	0	0	0	0	0	0.838577	1	0.531036	0.885059	0	0
chr14:374652..374714:+	0	0	9	0	0	0	0	0	0	0	0.838577	1	0.531036	0.885059	0	0
chr15:5688523..5688578:-	0	0	9	0	0	0	0	0	0	0	0.838577	1	0.531036	0.885059	0	0
chr6:48607662..48607717:+	0	0	0	0	4	0	0	0	0	0	0.842564	1	0.163757	0.272929	0	0
chr8:50415605..50415653:+	0	0	0	0	4	0	0	0	0	0	0.842564	1	0.163757	0.272929	0	0
chr3:43499680..43499737:+	0	0	0	0	12	0	0	0	0	0	0.843701	1	0.491272	0.818786	0	0
chr9:124954955..124955004:+	0	0	0	0	12	0	0	0	0	0	0.843701	1	0.491272	0.818786	0	0
chr9:70141769..70141825:+	0	0	0	0	12	0	0	0	0	0	0.843701	1	0.491272	0.818786	0	0
chr19:45067639..45067721:+	0	3	0	0	2	0	0	0	0	0	0.844752	1	0.917664	1.52944	0	0
chr10:79595166..79595231:+	0	0	0	9	0	0	0	0	0	0	0.849812	1	0.476429	0.794049	0	0
chr13:11765713..11765772:+	0	0	0	9	0	0	0	0	0	0	0.849812	1	0.476429	0.794049	0	0
chr14:109810243..109810303:-	0	0	0	9	0	0	0	0	0	0	0.849812	1	0.476429	0.794049	0	0
chr2:128798640..128798697:-	0	0	0	9	0	0	0	0	0	0	0.849812	1	0.476429	0.794049	0	0
chr2:188563826..188563884:-	0	0	0	9	0	0	0	0	0	0	0.849812	1	0.476429	0.794049	0	0
chr9:101882573..101882627:-	0	0	0	9	0	0	0	0	0	0	0.849812	1	0.476429	0.794049	0	0
chr4:127494813..127494867:+	0	0	8	0	0	0	0	0	0	0	0.85491	1	0.472032	0.786719	0	0
chr12:23738631..23738692:-	0	0	0	6	3	0	0	0	0	0	0.857439	1	0.440437	0.734062	0	0
chr20:55999278..55999340:+	0	0	0	0	10	0	0	0	0	0	0.863246	1	0.409393	0.682322	0	0
chr13:26794690..26794747:+	0	0	0	8	0	0	0	0	0	0	0.864105	1	0.423493	0.705821	0	0
chr9:122034307..122034365:+	0	0	0	1	2	0	0	0	0	0	0.864744	1	0.134815	0.224692	0	0
chr1:6543847..6543905:-	0	0	0	0	5	0	0	0	0	0	0.865715	1	0.204697	0.341161	0	0
chr14:92292768..92292828:-	0	0	0	0	5	0	0	0	0	0	0.865715	1	0.204697	0.341161	0	0
chr3:11689321..11689381:-	0	0	0	0	5	0	0	0	0	0	0.865715	1	0.204697	0.341161	0	0
chr12:42670436..42670506:-	0	0	0	5	3	0	0	0	0	0	0.870617	1	0.387501	0.645835	0	0
chr2:117047798..117047855:-	0	0	0	0	9	0	0	0	0	0	0.871665	1	0.368454	0.61409	0	0
chr2:153386617..153386674:+	0	0	0	0	6	0	0	0	0	0	0.875813	1	0.245636	0.409393	0	0
chr14:7894413..7894468:-	0	0	0	0	8	0	0	0	0	0	0.877439	1	0.327515	0.545858	0	0
chr9:46683321..46683380:+	0	0	0	0	8	0	0	0	0	0	0.877439	1	0.327515	0.545858	0	0
chr11:123662408..123662476:+	0	0	0	7	0	0	0	0	0	0	0.878006	1	0.370556	0.617593	0	0
chr1:81985878..81985936:+	0	0	0	0	7	0	0	0	0	0	0.879268	1	0.286575	0.477625	0	0
chr14:43728075..43728133:+	0	0	0	0	7	0	0	0	0	0	0.879268	1	0.286575	0.477625	0	0
chr12:103268946..103269008:-	0	0	2	0	4	0	0	0	0	0	0.887	1	0.281765	0.469609	0	0
chr1:86028005..86028066:+	0	0	6	0	0	0	0	0	0	0	0.888385	1	0.354024	0.59004	0	0
chr11:133992901..133992953:+	0	0	6	0	0	0	0	0	0	0	0.888385	1	0.354024	0.59004	0	0
chr6:7364661..7364728:+	0	0	6	0	0	0	0	0	0	0	0.888385	1	0.354024	0.59004	0	0
chr6:147766442..147766514:+	0	0	0	4	2	0	0	0	0	0	0.888543	1	0.293625	0.489375	0	0
chr10:14947278..14947341:-	0	0	0	6	0	0	0	0	0	0	0.889785	1	0.317619	0.529366	0	0
chr1:199850276..199850339:+	0	0	0	5	0	0	0	0	0	0	0.899341	1	0.264683	0.441138	0	0
chr17:30375395..30375450:+	0	0	0	5	0	0	0	0	0	0	0.899341	1	0.264683	0.441138	0	0
chr5:120518512..120518571:+	0	0	0	5	0	0	0	0	0	0	0.899341	1	0.264683	0.441138	0	0
chr9:118617501..118617559:-	0	0	0	5	0	0	0	0	0	0	0.899341	1	0.264683	0.441138	0	0
chr9:51242411..51242475:+	0	0	0	5	0	0	0	0	0	0	0.899341	1	0.264683	0.441138	0	0
chr4:36382314..36382371:+	0	0	0	4	0	0	0	0	0	0	0.910228	1	0.211746	0.352911	0	0
chr6:4273924..4273982:+	0	0	0	4	0	0	0	0	0	0	0.910228	1	0.211746	0.352911	0	0
chr7:83355568..83355627:+	0	0	0	4	0	0	0	0	0	0	0.910228	1	0.211746	0.352911	0	0
chr11:7147503..7147560:-	0	0	0	2	1	0	0	0	0	0	0.91059	1	0.146812	0.244687	0	0
chr16:76575886..76575949:+	0	0	3	0	1	0	0	0	0	0	0.913497	1	0.217951	0.363252	0	0
chr4:157077308..157077379:+	4	0	0	0	0	0	0	0	0	0	0.918845	1	0.457393	0.762322	0	0
chr13:64603820..64603875:-	0	0	4	0	0	0	0	0	0	0	0.92075	1	0.236016	0.39336	0	0
chr7:157181066..157181132:-	0	0	4	0	0	0	0	0	0	0	0.92075	1	0.236016	0.39336	0	0
chr7:143728755..143728813:+	0	0	0	0	0	4	0	0	0	0	0.924569	1	0.250767	0.417945	0	0
chr1:165750164..165750225:+	2	0	0	0	2	0	0	0	0	0	0.929487	1	0.310575	0.517625	0	0
chr1:26584177..26584243:+	0	0	0	3	0	0	0	0	0	0	0.93661	1	0.15881	0.264683	0	0
chr13:43749985..43750069:-	0	0	0	3	0	0	0	0	0	0	0.93661	1	0.15881	0.264683	0	0
chr4:40877029..40877109:+	0	0	0	3	0	0	0	0	0	0	0.93661	1	0.15881	0.264683	0	0
chr8:69686243..69686302:-	0	0	3	0	0	0	0	0	0	0	0.957841	1	0.177012	0.29502	0	0
chr19:13518242..13518302:+	0	0	0	0	0	3	0	0	0	0	0.964773	1	0.188075	0.313459	0	0
chr2:84372106..84372163:+	3	0	0	0	0	0	0	0	0	0	0.971465	1	0.343045	0.571741	0	0
chr1:112526078..112526141:+	0	0	2	0	0	0	0	0	0	0	1	1	0.118008	0.19668	0	0
chr1:115690624..115690706:-	0	0	0	0	1	0	0	0	0	0	1	1	0.0409393	0.0682322	0	0
chr1:117532919..117533002:+	0	0	1	0	0	0	0	0	0	0	1	1	0.059004	0.0983399	0	0
chr1:162561175..162561252:+	0	0	0	0	1	0	0	0	0	0	1	1	0.0409393	0.0682322	0	0
chr1:167900970..167901052:+	0	0	0	0	2	0	0	0	0	0	1	1	0.0818786	0.136464	0	0
chr1:169270142..169270202:-	2	0	0	0	0	0	0	0	0	0	1	1	0.228696	0.381161	0	0
chr1:200795081..200795142:+	0	0	1	0	0	0	0	0	0	0	1	1	0.059004	0.0983399	0	0
chr1:21911525..21911574:+	0	0	0	1	0	0	0	0	0	0	1	1	0.0529366	0.0882276	0	0
chr1:22246118..22246191:-	0	0	1	0	0	0	0	0	0	0	1	1	0.059004	0.0983399	0	0
chr1:30075183..30075240:-	0	0	0	0	1	0	0	0	0	0	1	1	0.0409393	0.0682322	0	0
chr1:40156335..40156409:-	0	0	0	0	1	0	0	0	0	0	1	1	0.0409393	0.0682322	0	0
chr1:4292014..4292083:-	0	0	1	0	0	0	0	0	0	0	1	1	0.059004	0.0983399	0	0
chr1:45797831..45797894:-	0	0	0	0	1	0	0	0	0	0	1	1	0.0409393	0.0682322	0	0
chr1:46271853..46271916:-	0	0	0	0	0	2	0	0	0	0	1	1	0.125383	0.208972	0	0
chr1:46356226..46356296:+	0	0	2	0	0	0	0	0	0	0	1	1	0.118008	0.19668	0	0
chr1:46923416..46923469:-	0	0	1	0	0	0	0	0	0	0	1	1	0.059004	0.0983399	0	0
chr1:81745044..81745103:-	0	0	0	2	0	0	0	0	0	0	1	1	0.105873	0.176455	0	0
chr10:10878625..10878684:-	0	0	0	1	0	0	0	0	0	0	1	1	0.0529366	0.0882276	0	0
chr10:20257597..20257668:+	0	0	1	0	0	0	0	0	0	0	1	1	0.059004	0.0983399	0	0
chr10:56374534..56374571:-	1	0	0	0	0	0	0	0	0	0	1	1	0.114348	0.19058	0	0
chr10:613982..614028:+	0	0	0	0	1	0	0	0	0	0	1	1	0.0409393	0.0682322	0	0
chr10:62611414..62611488:+	0	0	2	0	0	0	0	0	0	0	1	1	0.118008	0.19668	0	0
chr10:64901683..64901761:+	0	0	1	0	0	0	0	0	0	0	1	1	0.059004	0.0983399	0	0
chr10:65247194..65247250:+	0	0	1	0	0	0	0	0	0	0	1	1	0.059004	0.0983399	0	0
chr11:118159264..118159327:-	0	0	0	0	2	0	0	0	0	0	1	1	0.0818786	0.136464	0	0
chr11:133221459..133221527:-	0	0	0	0	1	0	0	0	0	0	1	1	0.0409393	0.0682322	0	0
chr11:43919093..43919154:-	0	0	0	0	2	0	0	0	0	0	1	1	0.0818786	0.136464	0	0
chr11:87151554..87151626:+	0	0	0	0	1	0	0	0	0	0	1	1	0.0409393	0.0682322	0	0
chr12:42256455..42256500:-	0	0	0	2	0	0	0	0	0	0	1	1	0.105873	0.176455	0	0
chr12:80577003..80577081:-	0	0	0	0	0	2	0	0	0	0	1	1	0.125383	0.208972	0	0
chr13:11480076..11480126:-	0	0	1	0	0	0	0	0	0	0	1	1	0.059004	0.0983399	0	0
chr13:136749624..136749706:-	0	0	0	1	0	0	0	0	0	0	1	1	0.0529366	0.0882276	0	0
chr13:19249733..19249785:+	0	0	1	0	0	0	0	0	0	0	1	1	0.059004	0.0983399	0	0
chr13:19949173..19949232:+	1	0	0	0	0	0	0	0	0	0	1	1	0.114348	0.19058	0	0
chr13:20373181..20373249:-	0	0	0	0	1	0	0	0	0	0	1	1	0.0409393	0.0682322	0	0
chr13:43359942..43360006:-	0	0	0	0	2	0	0	0	0	0	1	1	0.0818786	0.136464	0	0
chr13:71792902..71792959:-	0	0	0	2	0	0	0	0	0	0	1	1	0.105873	0.176455	0	0
chr13:86739074..86739154:-	0	0	2	0	0	0	0	0	0	0	1	1	0.118008	0.19668	0	0
chr13:97272088..97272160:-	0	0	0	0	1	0	0	0	0	0	1	1	0.0409393	0.0682322	0	0
chr13:97408756..97408798:+	0	0	0	0	2	0	0	0	0	0	1	1	0.0818786	0.136464	0	0
chr14:10691003..10691060:-	1	0	0	0	0	0	0	0	0	0	1	1	0.114348	0.19058	0	0
chr14:11461081..11461151:+	0	0	0	2	0	0	0	0	0	0	1	1	0.105873	0.176455	0	0
chr14:131153994..131154058:+	1	0	0	1	0	0	0	0	0	0	1	1	0.167285	0.278808	0	0
chr14:24945285..24945365:+	1	0	0	0	0	0	0	0	0	0	1	1	0.114348	0.19058	0	0
chr14:70113042..70113107:-	0	0	0	0	2	0	0	0	0	0	1	1	0.0818786	0.136464	0	0
chr14:76013506..76013595:+	0	0	0	0	1	0	0	0	0	0	1	1	0.0409393	0.0682322	0	0
chr14:8204878..8204939:-	0	0	0	0	1	0	0	0	0	0	1	1	0.0409393	0.0682322	0	0
chr15:15141811..15141859:+	0	0	0	0	1	0	0	0	0	0	1	1	0.0409393	0.0682322	0	0
chr15:1930031..1930088:+	0	0	1	0	0	0	0	0	0	0	1	1	0.059004	0.0983399	0	0
chr15:26120310..26120366:-	0	0	0	1	0	0	0	0	0	0	1	1	0.0529366	0.0882276	0	0
chr15:39613002..39613057:+	2	0	0	0	0	0	0	0	0	0	1	1	0.228696	0.381161	0	0
chr15:42357717..42357773:-	0	0	0	2	0	0	0	0	0	0	1	1	0.105873	0.176455	0	0
chr15:5495989..5496046:+	0	0	0	1	0	0	0	0	0	0	1	1	0.0529366	0.0882276	0	0
chr15:55730958..55731023:+	0	0	0	1	0	0	0	0	0	0	1	1	0.0529366	0.0882276	0	0
chr15:85302377..85302433:-	0	0	0	1	0	0	0	0	0	0	1	1	0.0529366	0.0882276	0	0
chr16:20455692..20455747:-	0	0	0	2	0	0	0	0	0	0	1	1	0.105873	0.176455	0	0
chr16:4800662..4800730:+	0	0	0	0	1	0	0	0	0	0	1	1	0.0409393	0.0682322	0	0
chr16:49116438..49116498:-	0	0	0	1	0	0	0	0	0	0	1	1	0.0529366	0.0882276	0	0
chr16:49130067..49130141:-	1	0	0	0	0	0	0	0	0	0	1	1	0.114348	0.19058	0	0
chr16:58213766..58213822:-	1	0	0	0	0	0	0	0	0	0	1	1	0.114348	0.19058	0	0
chr16:73850537..73850596:-	0	0	0	1	0	0	0	0	0	0	1	1	0.0529366	0.0882276	0	0
chr16:76449793..76449855:+	0	0	0	0	1	0	0	0	0	0	1	1	0.0409393	0.0682322	0	0
chr16:76449806..76449841:+	0	0	0	1	0	0	0	0	0	0	1	1	0.0529366	0.0882276	0	0
chr17:33512913..33512970:-	0	2	0	0	0	0	0	0	0	0	1	1	0.55719	0.92865	0	0
chr17:90925347..90925419:+	0	0	0	2	0	0	0	0	0	0	1	1	0.105873	0.176455	0	0
chr18:50876636..50876705:-	0	0	1	0	0	0	0	0	0	0	1	1	0.059004	0.0983399	0	0
chr19:1816877..1816933:-	0	0	0	2	0	0	0	0	0	0	1	1	0.105873	0.176455	0	0
chr19:1946178..1946219:-	0	0	0	1	0	0	0	0	0	0	1	1	0.0529366	0.0882276	0	0
chr19:45967162..45967233:+	1	0	0	0	0	0	0	0	0	0	1	1	0.114348	0.19058	0	0
chr19:48264280..48264350:-	0	0	0	1	0	0	0	0	0	0	1	1	0.0529366	0.0882276	0	0
chr19:4934648..4934707:+	0	0	0	1	0	0	0	0	0	0	1	1	0.0529366	0.0882276	0	0
chr2:151816131..151816199:-	0	0	1	0	0	0	0	0	0	0	1	1	0.059004	0.0983399	0	0
chr2:152841694..152841755:+	0	0	0	2	0	0	0	0	0	0	1	1	0.105873	0.176455	0	0
chr2:182937894..182937950:+	0	0	0	1	0	0	0	0	0	0	1	1	0.0529366	0.0882276	0	0
chr2:186083718..186083777:+	0	0	0	1	0	0	0	0	0	0	1	1	0.0529366	0.0882276	0	0
chr2:41604768..41604842:+	0	0	0	0	1	0	0	0	0	0	1	1	0.0409393	0.0682322	0	0
chr2:84768326..84768390:-	0	0	0	0	2	0	0	0	0	0	1	1	0.0818786	0.136464	0	0
chr20:1482023..1482082:+	0	0	0	1	0	0	0	0	0	0	1	1	0.0529366	0.0882276	0	0
chr20:29319769..29319841:+	0	0	1	0	0	0	0	0	0	0	1	1	0.059004	0.0983399	0	0
chr20:3265093..3265157:-	0	0	0	1	0	0	0	0	0	0	1	1	0.0529366	0.0882276	0	0
chr20:55220777..55220836:+	0	0	0	1	0	0	0	0	0	0	1	1	0.0529366	0.0882276	0	0
chr20:66264269..66264340:+	0	0	0	1	0	0	0	0	0	0	1	1	0.0529366	0.0882276	0	0
chr20:71973306..71973381:+	0	0	0	0	2	0	0	0	0	0	1	1	0.0818786	0.136464	0	0
chr20:86894132..86894178:-	1	0	0	0	0	0	0	0	0	0	1	1	0.114348	0.19058	0	0
chr3:108265810..108265875:+	0	0	1	0	0	0	0	0	0	0	1	1	0.059004	0.0983399	0	0
chr3:118561502..118561568:-	0	0	2	0	0	0	0	0	0	0	1	1	0.118008	0.19668	0	0
chr3:166169896..166169946:+	1	0	0	0	0	0	0	0	0	0	1	1	0.114348	0.19058	0	0
chr3:170505601..170505657:-	0	0	0	2	0	0	0	0	0	0	1	1	0.105873	0.176455	0	0
chr3:405951..406013:-	1	0	0	1	0	0	0	0	0	0	1	1	0.167285	0.278808	0	0
chr3:40781148..40781209:-	0	0	1	0	0	0	0	0	0	0	1	1	0.059004	0.0983399	0	0
chr3:42774733..42774800:+	0	0	0	1	0	0	0	0	0	0	1	1	0.0529366	0.0882276	0	0
chr3:52380767..52380806:-	0	0	0	1	0	0	0	0	0	0	1	1	0.0529366	0.0882276	0	0
chr3:54258827..54258889:-	0	0	0	2	0	0	0	0	0	0	1	1	0.105873	0.176455	0	0
chr3:81547462..81547506:+	0	0	1	0	0	0	0	0	0	0	1	1	0.059004	0.0983399	0	0
chr3:84630362..84630415:-	0	0	0	0	2	0	0	0	0	0	1	1	0.0818786	0.136464	0	0
chr4:130540062..130540125:-	0	0	1	0	0	0	0	0	0	0	1	1	0.059004	0.0983399	0	0
chr4:158187926..158187985:-	0	0	0	0	2	0	0	0	0	0	1	1	0.0818786	0.136464	0	0
chr4:79444388..79444448:-	2	0	0	0	0	0	0	0	0	0	1	1	0.228696	0.381161	0	0
chr4:83620713..83620780:-	0	0	1	0	0	0	0	0	0	0	1	1	0.059004	0.0983399	0	0
chr5:146312253..146312316:+	0	0	0	0	2	0	0	0	0	0	1	1	0.0818786	0.136464	0	0
chr5:1486642..1486701:+	0	0	0	2	0	0	0	0	0	0	1	1	0.105873	0.176455	0	0
chr5:152368390..152368450:+	0	0	0	1	0	0	0	0	0	0	1	1	0.0529366	0.0882276	0	0
chr5:165425662..165425733:+	0	0	0	0	1	0	0	0	0	0	1	1	0.0409393	0.0682322	0	0
chr5:167050889..167050952:+	0	0	1	0	0	0	0	0	0	0	1	1	0.059004	0.0983399	0	0
chr5:73260519..73260590:-	0	0	0	1	0	0	0	0	0	0	1	1	0.0529366	0.0882276	0	0
chr6:151151824..151151894:+	0	0	1	0	0	0	0	0	0	0	1	1	0.059004	0.0983399	0	0
chr7:102249465..102249523:-	0	0	0	0	0	2	0	0	0	0	1	1	0.125383	0.208972	0	0
chr7:108088213..108088271:-	0	0	0	2	0	0	0	0	0	0	1	1	0.105873	0.176455	0	0
chr7:124126206..124126262:+	0	0	0	2	0	0	0	0	0	0	1	1	0.105873	0.176455	0	0
chr7:132911019..132911075:+	0	0	0	0	1	0	0	0	0	0	1	1	0.0409393	0.0682322	0	0
chr7:134800747..134800804:+	0	0	0	0	1	0	0	0	0	0	1	1	0.0409393	0.0682322	0	0
chr7:13944925..13944985:+	0	0	0	2	0	0	0	0	0	0	1	1	0.105873	0.176455	0	0
chr7:160019594..160019680:+	0	0	0	2	0	0	0	0	0	0	1	1	0.105873	0.176455	0	0
chr7:162844942..162845001:-	0	0	0	1	0	0	0	0	0	0	1	1	0.0529366	0.0882276	0	0
chr7:168383304..168383363:-	0	0	0	0	1	0	0	0	0	0	1	1	0.0409393	0.0682322	0	0
chr7:20838769..20838828:+	0	0	0	0	1	0	0	0	0	0	1	1	0.0409393	0.0682322	0	0
chr7:30580141..30580199:-	1	0	0	0	0	0	0	0	0	0	1	1	0.114348	0.19058	0	0
chr8:107066204..107066263:-	0	0	0	2	0	0	0	0	0	0	1	1	0.105873	0.176455	0	0
chr8:134592570..134592626:+	0	0	0	2	0	0	0	0	0	0	1	1	0.105873	0.176455	0	0
chr8:3913504..3913550:-	2	0	0	0	0	0	0	0	0	0	1	1	0.228696	0.381161	0	0
chr9:111967487..111967538:+	0	0	0	0	2	0	0	0	0	0	1	1	0.0818786	0.136464	0	0
chr9:121856081..121856142:+	0	0	0	2	0	0	0	0	0	0	1	1	0.105873	0.176455	0	0
chr9:29687401..29687460:-	0	0	0	0	1	0	0	0	0	0	1	1	0.0409393	0.0682322	0	0
chr9:31341892..31341941:+	1	0	0	0	0	0	0	0	0	0	1	1	0.114348	0.19058	0	0
